# Supplementary material for: Minimalistic amino amides as models to study N–H⋯π interactions and their implication in the side chain folding of pseudopeptidic molecules
Source: Royal Society of Chemistry journal article supplement (doi:10.1039/c3ra41843j), 2013-01-01

# Supporting Information

## Minimalistic amino amides as models to study N-H... $\pi$ interactions and their implication in the side chain folding of pseudopeptidic molecules

Enrico Faggi,<sup>a</sup> Santiago V. Luis<sup>\*,b</sup> and Ignacio Alfonso<sup>\*,a</sup>

<sup>a</sup>Department of Biological Chemistry and Molecular Modelling, IQAC-CSIC, Jordi Girona 18-26, 08034 Barcelona, Spain

<sup>b</sup>Department of Inorganic and Organic Chemistry, Universitat Jaume I, Avd. Sos Baynat, Castelló, Spain.

### Table of Contents

|                                                                   |             |
|-------------------------------------------------------------------|-------------|
| <b>Synthesis procedures and characterization of new compounds</b> | <b>S-2</b>  |
| <b>NMR Spectra</b>                                                | <b>S-5</b>  |
| <b>ATR-IR Spectra</b>                                             | <b>S-49</b> |
| <b>Thermal Analysis</b>                                           | <b>S-53</b> |
| <b>Molecular Modelling</b>                                        | <b>S-55</b> |

## Synthetic procedures and characterization of new compounds

### General

Reagents and solvents were purchased from commercial suppliers (Aldrich, Fluka, or Merck) and were used without further purification. Flash chromatographic purifications and preparative reversed-phase purifications were performed on a Biotage® Isolera Prime™ equipment. TLCs were performed using 6x3 cm SiO<sub>2</sub> pre-coated aluminium plates (ALUGRAM® SIL G/UV<sub>254</sub>).

The NMR spectroscopic experiments were carried out either on an Agilent VNMRs Direct Drive 400 (400 and 101 MHz for <sup>1</sup>H and <sup>13</sup>C NMR, respectively) or on Agilent Inova 500 (500 and 125 MHz for <sup>1</sup>H and <sup>13</sup>C NMR, respectively) spectrometers. The chemical shifts are reported in ppm, using the solvent signal as internal standard (CDCl<sub>3</sub> = 7.26 ppm; CD<sub>3</sub>CN = 1.94 ppm; dmsO-*d*<sub>6</sub> = 2.50 ppm). In the experiment in which the dmsO/CDCl<sub>3</sub> ratio was varied, Tetrakis(trimethylsilyl)silane was used as a reference (0.00 ppm).

Scanning Electron Microscopy was performed on a FEI Quanta 200 microscope with a digital camera. Samples were obtained by slow evaporation of a 20 mM solution of compound X in different solvents, directly onto the glass sample holder, followed by conventional gold coating.

High Resolution Mass Spectrometry analyses were carried out at the IQAC Mass Spectrometry Facility, using an UPLC-ESI-TOF equipment: [Acquity UPLC® BEH C<sub>18</sub> 1.7 mm, 2.1x100 mm, LCT Premier Xe, Watters]. (CH<sub>3</sub>CN + 20 mM HCOOH and H<sub>2</sub>O + 20 mM HCOOH) mixtures at 0.3 mL/min were used as mobile phase.

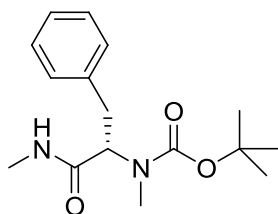

**Boc,Me-Phe-NHMe (2c).** To a solution of N-α-Boc-N-α-methyl-Phenylalanine (Boc,Me,Phe-OH, 500 mg, 1.79 mmol) in dry Tetrahydrofuran (15 ml) were added *N,N*-Diisopropylethylamine (410 μl, 2.33 mmol) and 1-[Bis(dimethylamino)methylene]-1*H*-1,2,3-triazolo[4,5-*b*]pyridinium 3-oxid hexafluorophosphate (HATU, 750 mg, 1.97 mmol). The mix was stirred at room temperature under Argon for 10 minutes, and then a solution of methylamine in Tetrahydrofuran (2.0 M, 3.6 ml, 7.2 mmol) was added. The reaction mix was stirred at room temperature for 18 hours. Solvents were removed at reduced pressure and the residue dissolved in chloroform and washed twice with water. Organic layer was dried over MgSO<sub>4</sub> and evaporated at reduced pressure. The crude product was purified by flash column chromatography (SiO<sub>2</sub>; hexane:AcOEt 1:1 to 1:2), affording the desired product as a colorless oil (418 mg, 1.43 mmol, 80% yield). Two rotamers (A and B) are observed.

<sup>1</sup>H-NMR (CD<sub>3</sub>OD, 400 MHz) δ 7.28-7.15 (m, 5H), 4.66 (d, *J* = 7.5 Hz, 1H), 3.28 (dd, *J* = 14.2, 4.9 Hz, 1H), 2.94 (dd, *J* = 14.2, 11.0 Hz, 1H), 2.75 (s, 3H), 2.73 (s, 3H), 1.33 (s, 3H), 1.28 (s, 6H). <sup>13</sup>C-NMR (CD<sub>3</sub>OD, 101 MHz) δ 173.2 (A), 172.8 (B), 157.5 (A), 156.9 (B), 139.5 (A), 138.9 (B), 130.2 (A), 130.1 (B), 129.5 (A), 129.3 (B), 127.5, 81.5 (A), 81.3 (B), 63.2, 61.0, 35.7 (A), 35.6 (B), 32.1 (A), 31.7 (B), 28.5 (A), 28.4 (B), 26.5 (A), 26.4 (B). HRMS: *m/z* calculated for C<sub>16</sub>H<sub>24</sub>N<sub>2</sub>O<sub>3</sub>Na: 315.1685, found 315.1713 (M+Na)<sup>+</sup>; *m/z* calculated for C<sub>32</sub>H<sub>48</sub>N<sub>4</sub>O<sub>6</sub>Na: 607.3472, found 607.3500 (2M+Na)<sup>+</sup>.

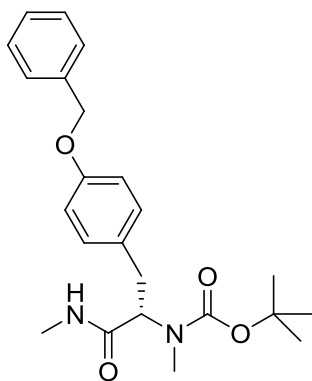

**Boc,Me-(OBn)Tyr-NHMe (2d).** Prepared following the same procedure of **2c**. Starting from 500 mg (1.30 mmol) of Boc,Me-(OBn)Tyr-OH, desired product was obtained as a pale yellow waxy solid (320 mg, 0.80 mmol, 62% yield). Two rotamers (A and B) are observed.

<sup>1</sup>H-NMR (CD<sub>3</sub>OD, 400 MHz) δ 7.81 (bs, 1H), 7.42-7.26 (m, 5H), 7.11 (d, *J* = 8.5 Hz, 2H), 6.91 (d, *J* = 8.5 Hz, 2H), 5.04 (s, 2H), 4.60 (d, *J* = 10.5 Hz, 1H), 3.20 (dd, *J* = 14.3, 5.0 Hz, 1H), 2.87 (dd, *J* = 14.3, 10.9 Hz, 1H), 2.72 (s, 6H), 1.33 (s, 3H), 1.27 (s, 6H). <sup>13</sup>C-NMR (CD<sub>3</sub>OD, 101 MHz) δ 173.4, 159.0, 157.7 (A), 157.1 (B), 138.8, 131.1, 129.5, 128.8, 128.5, 116.0, 81.7 (A), 81.4 (B), 71.0, 63.4, 61.2, 34.9, 32.0 (A), 31.7 (B), 28.5 (3C), 26.5. HRMS: *m/z* calculated for C<sub>23</sub>H<sub>30</sub>N<sub>2</sub>NaO<sub>4</sub> (M+Na)<sup>+</sup>: 421.2103, found 421.2122.

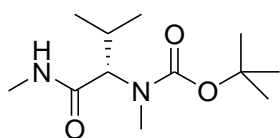

**Boc,Me-Val-NHMe (2a).** Prepared following the same procedure of **2c**. Starting from 500 mg (2.16 mmol) of Boc,Me-Val-OH, desired product was obtained as a white solid (430 mg, 1.76 mmol, 81% yield).

$^1\text{H-NMR}$  ( $\text{CDCl}_3$ , 400 MHz)  $\delta$  6.34 (bs, 1H), 3.98 (d,  $J = \text{Hz}$ , 1H), 2.76 (s, 3H), 2.70 (d,  $J = 4.9$  Hz, 3H), 2.26-2.14 (m, 1H), 1.39 (s, 9H), 0.86 (d,  $J = 6.6$  Hz, 3H), 0.79 (d,  $J = 6.7$  Hz, 3H).  $^{13}\text{C-NMR}$  ( $\text{CDCl}_3$ , 101 MHz)  $\delta$  171.2, 156.5, 79.6, 64.0, 29.8, 28.1 (3C), 26.2, 25.6, 19.4, 18.4. HRMS:  $m/z$  calculated for  $\text{C}_{24}\text{H}_{48}\text{N}_4\text{NaO}_6$  ( $2\text{M}+\text{Na}$ ) $^+$ : 511.3472, found 511.3509.

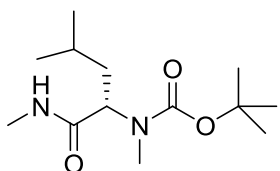

**Boc,Me,Leu-NHMe (2b).** Prepared following the same procedure of **2c**. Starting from 500 mg (2.04 mmol) of Boc,Me-Leu-OH, desired product was obtained as a pale yellow oil (350 mg, 1.36 mmol, 66% yield). Two rotamers are observed.

$^1\text{H-NMR}$  ( $\text{CD}_3\text{OD}$ , 400 MHz)  $\delta$  7.79 (bs, 1H), 4.70 (bs, 1H), 4.64 (bs, 1H), 2.80 (s, 3H), 2.75 (d,  $J = 4.5$  Hz, 3H), 1.72-1.63 (m, 2H), 1.49 (s, 9H), 0.98 (d,  $J = 6.7$  Hz, 6H).  $^{13}\text{C-NMR}$  ( $\text{CD}_3\text{OD}$ , 101 MHz)  $\delta$  174.1, 157.71 (A), 157.2 (B), 81.5 (A), 81.2 (B), 59.0 (A), 57.4 (B), 38.9 (A), 38.5 (B), 30.7 (A), 30.6 (B), 28.7 (3C), 26.4 (A), 26.0 (B), 23.7, 21.9 (2C). HRMS:  $m/z$  calculated for  $\text{C}_{13}\text{H}_{26}\text{N}_2\text{NaO}_3$  ( $\text{M}+\text{Na}$ ) $^+$ : 281.1841, found 281.1866; calculated for  $\text{C}_{26}\text{H}_{52}\text{N}_4\text{NaO}_6$  ( $2\text{M}+\text{Na}$ ) $^+$ : 539.3785, found 539.3829.

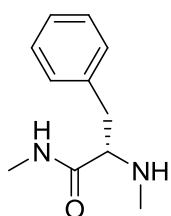

**Me-Phe-NHMe (3c).** To a solution of **2c**, 400 mg, 1.37 mmol) in dry Dichloromethane (4 ml) was added Trifluoroacetic Acid (3 ml) and the mix was stirred at room temperature under Argon for 3 hours. Solvents were removed at reduced pressure and the residue dissolved in 10% aqueous NaOH and extracted three times with DCM. Organic layers were combined, dried over  $\text{MgSO}_4$  and evaporated at reduced pressure, affording the desired product as a pale-yellow oil (184 mg, 0.96 mmol, 70% yield).  $[\alpha]_D = +19.7$  (c 0.005, MeOH).

$^1\text{H-NMR}$  ( $\text{CDCl}_3$ , 400 MHz)  $\delta$  7.33-7.20 (m, 5H, Ph), 7.13 (bs, 1H, amide NH), 3.27 (dd,  $J = 9.0, 4.5$  Hz, 1H,  $\text{H}\alpha$ ), 3.21 (dd,  $J = 13.6, 4.5$  Hz, 1H,  $\text{H}\beta$ ), 2.81 (d,  $J = 5.1$  Hz, 3H, amide Me), 2.73 (dd,  $J = 13.6, 9.0$  Hz, 1H,  $\text{H}\beta'$ ), 2.29 (s, 3H, amine Me).  $^{13}\text{C-NMR}$  ( $\text{CDCl}_3$ , 101 MHz)  $\delta$  174.0, 137.6, 129.1, 128.7, 126.9, 66.0, 39.3, 35.4, 25.8. HRMS:  $m/z$  calculated for  $\text{C}_{11}\text{H}_{17}\text{N}_2\text{O}$  ( $\text{M}+\text{H}$ ) $^+$ : 193.1341, found 193.1355; calculated for  $\text{C}_{11}\text{H}_{16}\text{N}_2\text{NaO}$  ( $\text{M}+\text{Na}$ ) $^+$ : 215.1160, found 215.1193.

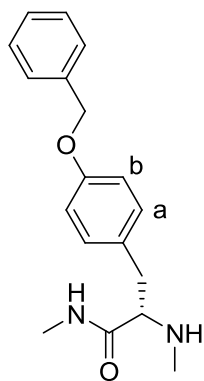

**Me-(OBn)Tyr-NHMe (3d).** Prepared following the same procedure of **3c**. Starting from 300 mg (0.75 mmol) of **2d**, desired product obtained as a white solid (202 mg, 0.68 mmol, 90% yield).  $[\alpha]_D = +11.0$  (c 0.002, MeOH).  $^1\text{H-NMR}$  ( $\text{CDCl}_3$ , 400 MHz)  $\delta$  7.44-7.31 (m, 5H, Bn), 7.12 (d,  $J = 8.6$  Hz, 2H, Ph Ha), 6.92 (d,  $J = 8.5$  Hz, 2H, Ph Hb), 5.05 (s, 2H,  $\text{CH}_2$  Bn), 3.18 (dd,  $J = 8.9, 4.3$  Hz, 1H,  $\text{H}\alpha$ ), 3.14 (dd,  $J = 13.6, 4.3$  Hz, 1H,  $\text{H}\beta$ ), 2.82 (d,  $J = 4.9$  Hz, 3H, amide Me), 2.64 (dd,  $J = 13.6, 8.9$  Hz, 1H,  $\text{H}\beta'$ ), 2.27 (s, 3H, amine Me).  $^{13}\text{C-NMR}$  ( $\text{CDCl}_3$ , 101 MHz)  $\delta$  174.1, 157.9, 137.1, 130.2, 129.8, 128.7, 128.1, 127.6, 115.2, 70.1, 66.3, 38.5, 35.6, 25.9. HRMS:  $m/z$  calculated for  $\text{C}_{18}\text{H}_{23}\text{N}_2\text{O}_2$  ( $\text{M}+\text{H}$ ) $^+$ : 299.1760, found 299.1784; calculated for  $\text{C}_{18}\text{H}_{22}\text{N}_2\text{NaO}_2$  ( $\text{M}+\text{Na}$ ) $^+$ : 221.1579, found 221.1604.

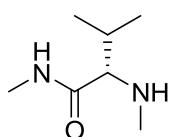

**Me,Val-NHMe (3a).** Prepared following the same procedure of **3c**. Starting from 239 mg (0.98 mmol) of **2a**, desired product obtained as a white solid (123 mg, 0.85 mmol, 87% yield).  $[\alpha]_D = -15.5$  (c 0.008, MeOH).  $^1\text{H-NMR}$  ( $\text{CDCl}_3$ , 400 MHz)  $\delta$  7.16 (bs, 1H, amide NH), 2.84 (d,  $J = 5.1$  Hz, 3H, amide Me), 2.82 (d,  $J = 4.5$  Hz, 1H,  $\text{H}\alpha$ ), 2.39 (s, 3H, amine Me), 2.16-2.08 (m, 1H,  $\text{H}\beta$ ), 1.67 (bs, 1H, amine NH), 0.99 (d,  $J = 7.0$  Hz, 3H,  $\text{H}\gamma$ ), 0.89 (d,  $J = 6.9$  Hz, 3H,  $\text{H}\gamma'$ ).

$^{13}\text{C-NMR}$  ( $\text{CDCl}_3$ , 101 MHz)  $\delta$  174.2, 70.7, 36.0, 31.2, 25.4, 19.4, 17.8. HRMS:  $m/z$  calculated for  $\text{C}_7\text{H}_{17}\text{N}_2\text{O}$  ( $\text{M}+\text{H}$ ) $^+$ : 145.1341, found 145.1367; calculated for  $\text{C}_7\text{H}_{16}\text{N}_2\text{NaO}$  ( $\text{M}+\text{Na}$ ) $^+$ : 167.1160, found 167.0890.

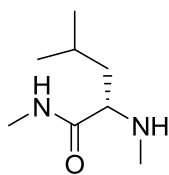

**Me-Leu-NHMe (3b).** Prepared following the same procedure of **3c**. Starting from 190 mg (0.74 mmol) of **2b**, desired product was obtained as a pale-yellow oil (109 mg, 0.69 mmol, 94% yield).  $[\alpha]_D = -5.0$  (c 0.005, MeOH).  $^1\text{H-NMR}$  ( $\text{CDCl}_3$ , 400 MHz)  $\delta$  7.20 (bs, 1H, amide NH), 3.04 (dd,  $J = 8.9, 4.9$  Hz,  $\text{H}\alpha$ ), 2.83 (d,  $J = 5.1$  Hz, 3H, amide Me), 1.72-1.57 (m, 2H,  $\text{H}\beta$  and  $\text{H}\gamma$ ), 1.39 (ddd,  $J = 13.3, 8.8, 5.6$  Hz, 1H,  $\text{H}\beta'$ ), 0.95 (d,  $J = 6.7$  Hz, 3H,  $\text{H}\delta$ ), 0.93 (d,  $J = 6.7$  Hz, 3H,  $\text{H}\delta'$ ).  $^{13}\text{C-NMR}$  ( $\text{CDCl}_3$ , 101 MHz)  $\delta$  175.4, 63.3, 42.8, 35.2, 25.6, 24.9, 23.0, 21.9.

HRMS:  $m/z$  calculated for  $\text{C}_{16}\text{H}_{36}\text{N}_4\text{NaO}_2$  ( $2\text{M}+\text{Na}$ ) $^+$ : 339.2736, found 339.3386.

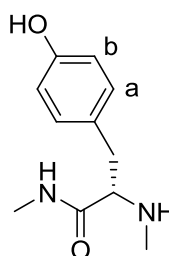

**Me-Tyr-NHMe (3e).** To a solution of **3d** (155 mg, 0.52 mmol) in THF (5.0 ml) and methanol (2.0 ml), in Argon atmosphere, was added Pd/C (10% Pd, 50 mg). Argon was replaced by hydrogen (2 atm) and the black suspension was stirred for 20 hours at room temperature. The catalyst was filtered through celite and washed thoroughly with methanol. The filtrate was concentrated under reduced pressure, affording the desired product as a pale yellow solid (106 mg, 0.51 mmol, 98% yield).  $[\alpha]_D = +32.6$  (c 0.005, MeOH).  $^1\text{H-NMR}$  ( $\text{CDCl}_3$ , 400 MHz)  $\delta$  7.14 (bs, 1H, amide NH), 7.06 (d,  $J = 8.5$  Hz, 2H, Ph Ha), 6.79 (d,  $J = 8.5$  Hz, 2H, Ph Hb), 3.15 (dd,  $J = 8.5, 4.3$  Hz, 1H,  $\text{H}\alpha$ ), 3.13 (dd,  $J = 13.2, 4.3$  Hz, 1H,  $\text{H}\beta$ ), 2.83 (d,  $J = 5.0$  Hz,

3H, amide Me), 2.62 (dd,  $J = 13.2, 8.5$  Hz, 1H,  $\text{H}\beta'$ ), 2.26 (s, 3H, amine Me).  $^{13}\text{C-NMR}$  ( $\text{CDCl}_3$ , 101 MHz)  $\delta$  174.9, 155.7, 130.2, 128.6, 115.9, 66.4, 38.6, 35.6, 26.0. HRMS:  $m/z$  calculated for  $\text{C}_{11}\text{H}_{17}\text{N}_2\text{O}_2$  ( $\text{M}+\text{H}$ ) $^+$ : 209.1290, found 209.1287; calculated for  $\text{C}_{11}\text{H}_{16}\text{N}_2\text{NaO}_2$  ( $\text{M}+\text{Na}$ ) $^+$ : 231.1109, found 231.1087; calculated for  $\text{C}_{22}\text{H}_{32}\text{N}_4\text{NaO}_4$  ( $2\text{M}+\text{Na}$ ) $^+$ : 439.2321, found 439.2285.

**NMR Spectra:** unless otherwise stated at 400 MHz ( $^1\text{H}$ ) or 101 MHz ( $^{13}\text{C}$ ) and at 298K

$^1\text{H}$  and  $^{13}\text{C}$  NMR spectra of **2a**.

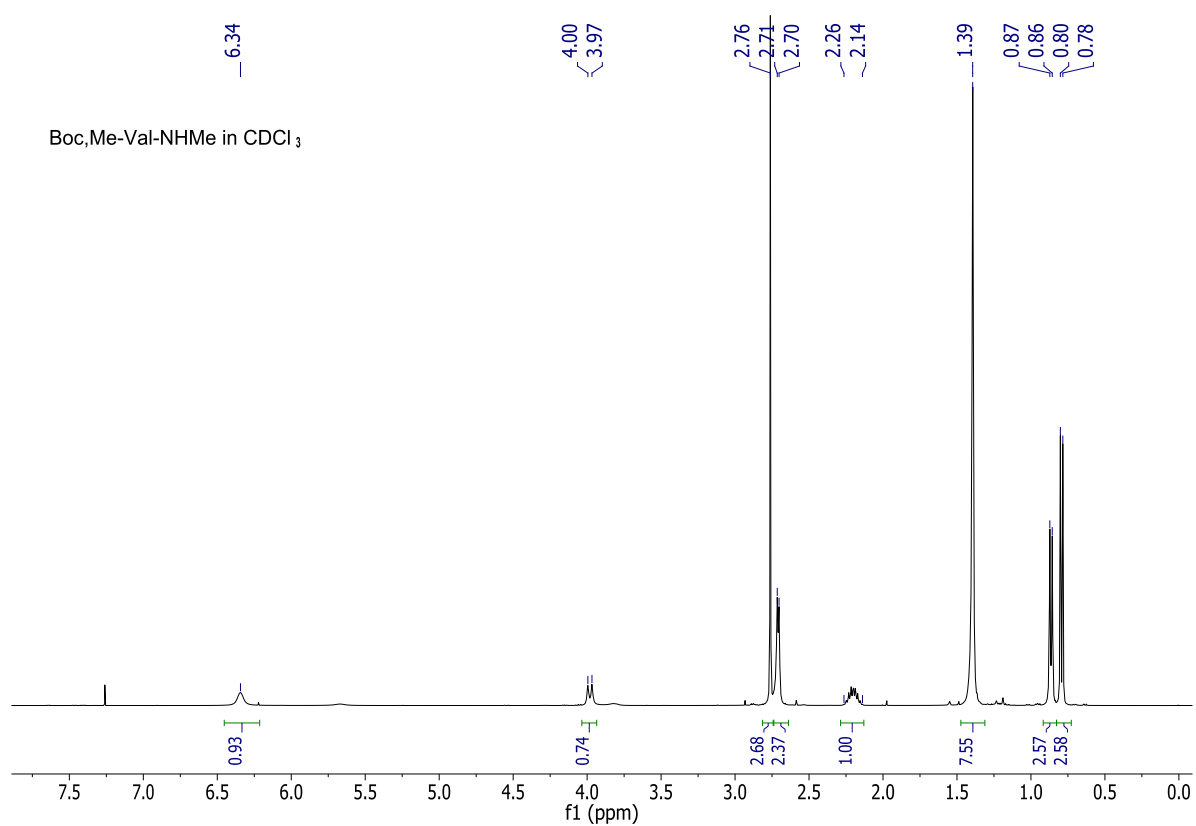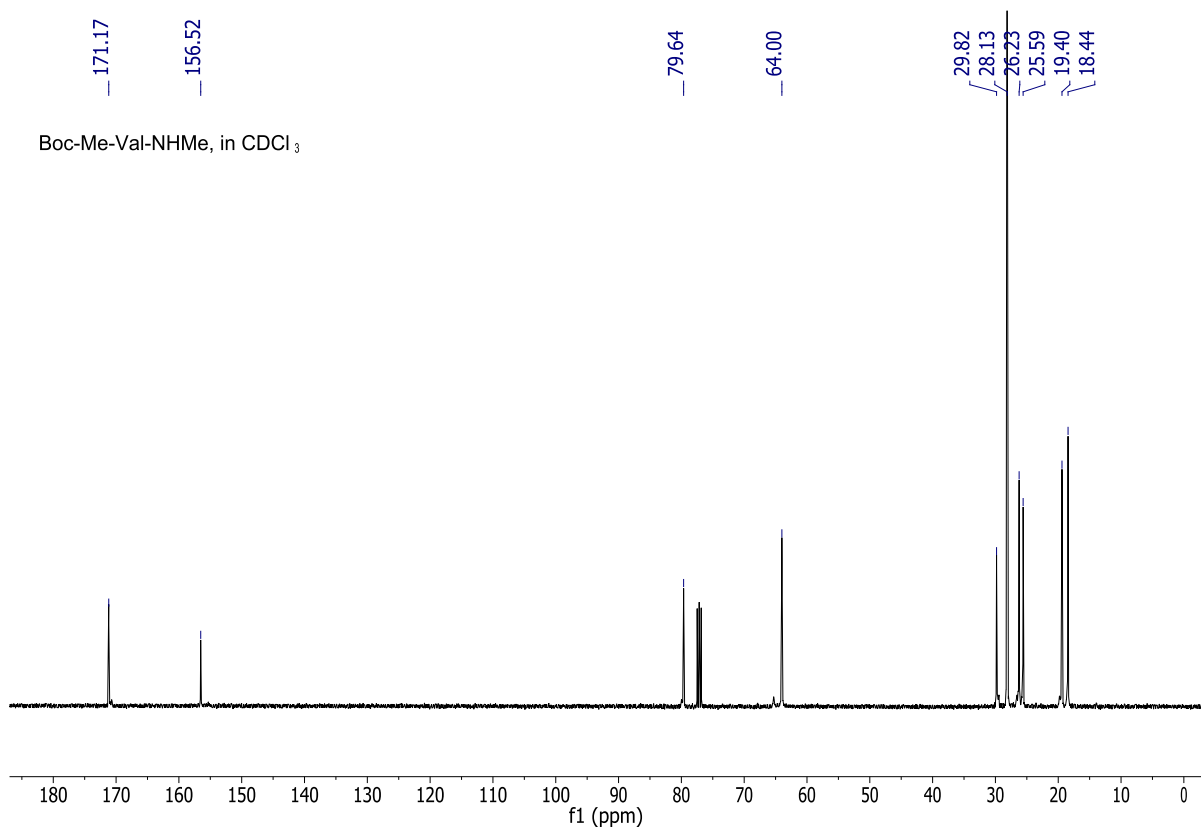

$^1\text{H}$  and  $^{13}\text{C}$  NMR spectra of **2b**.

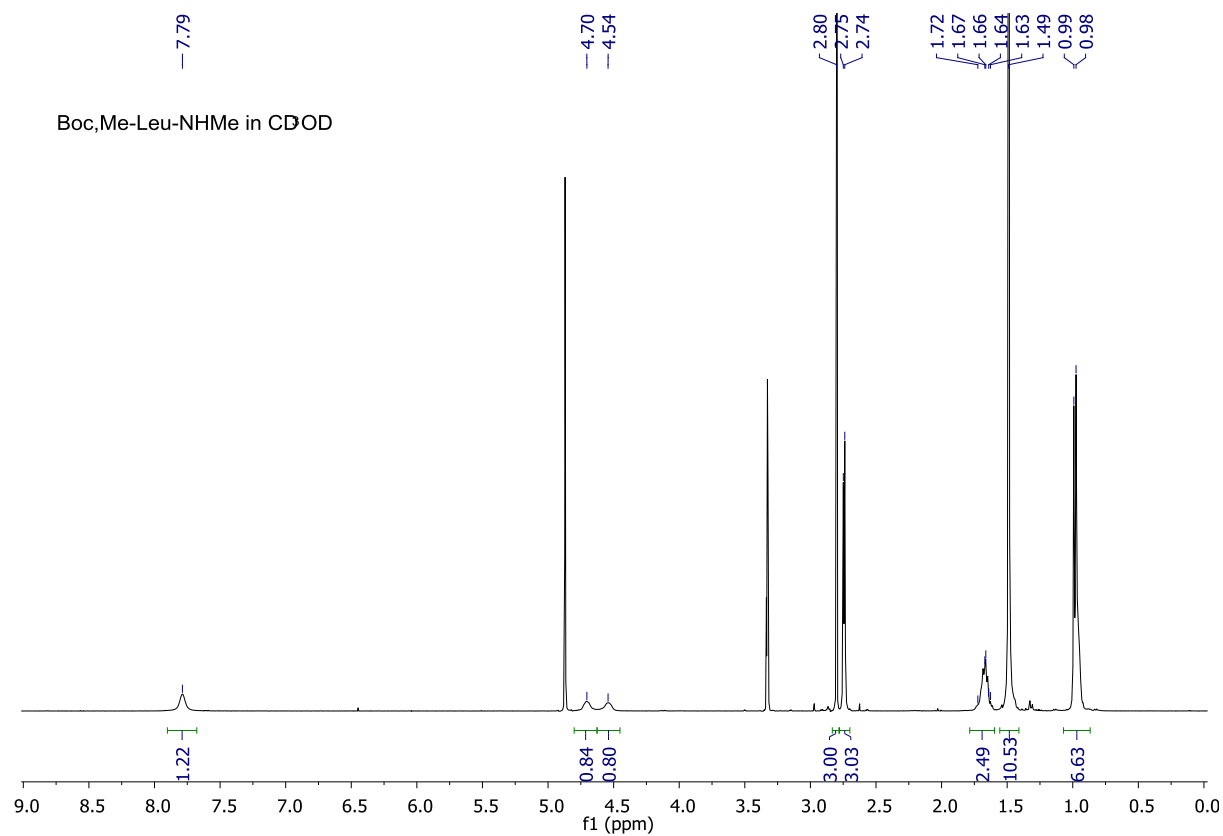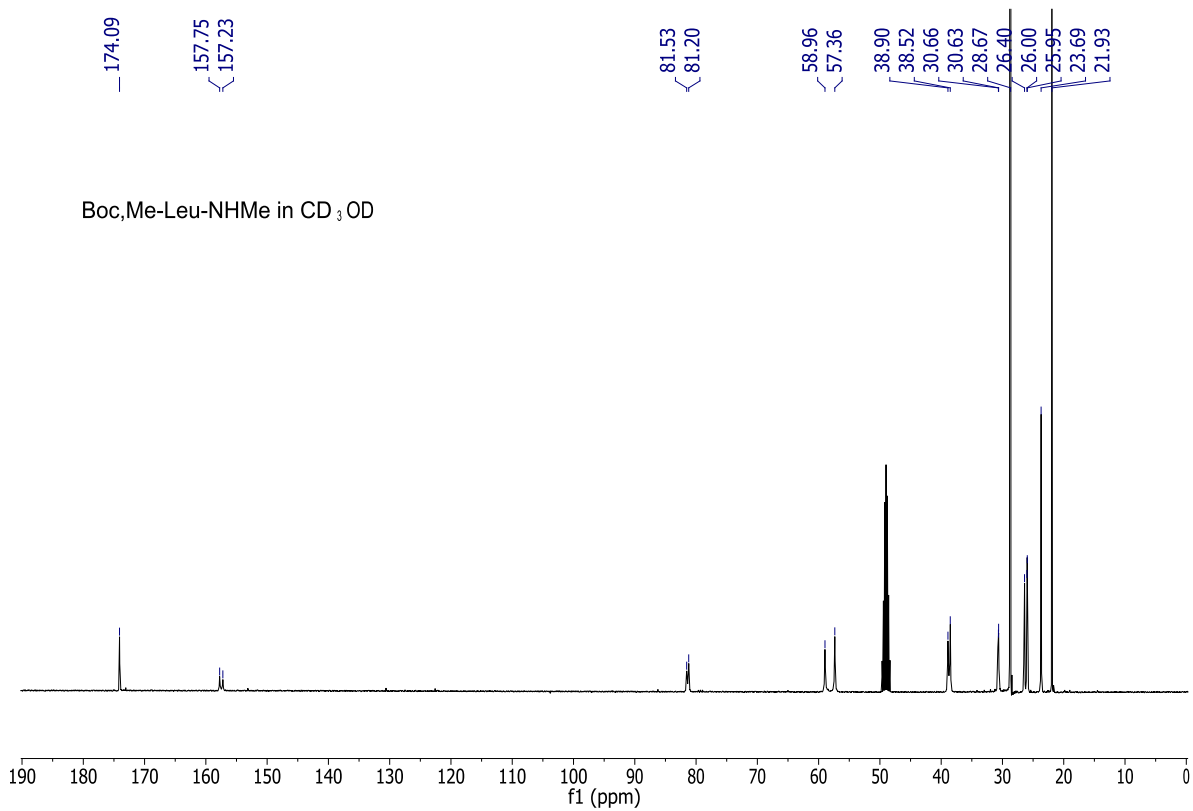

$^1\text{H}$  and  $^{13}\text{C}$  NMR spectra of **2c**.

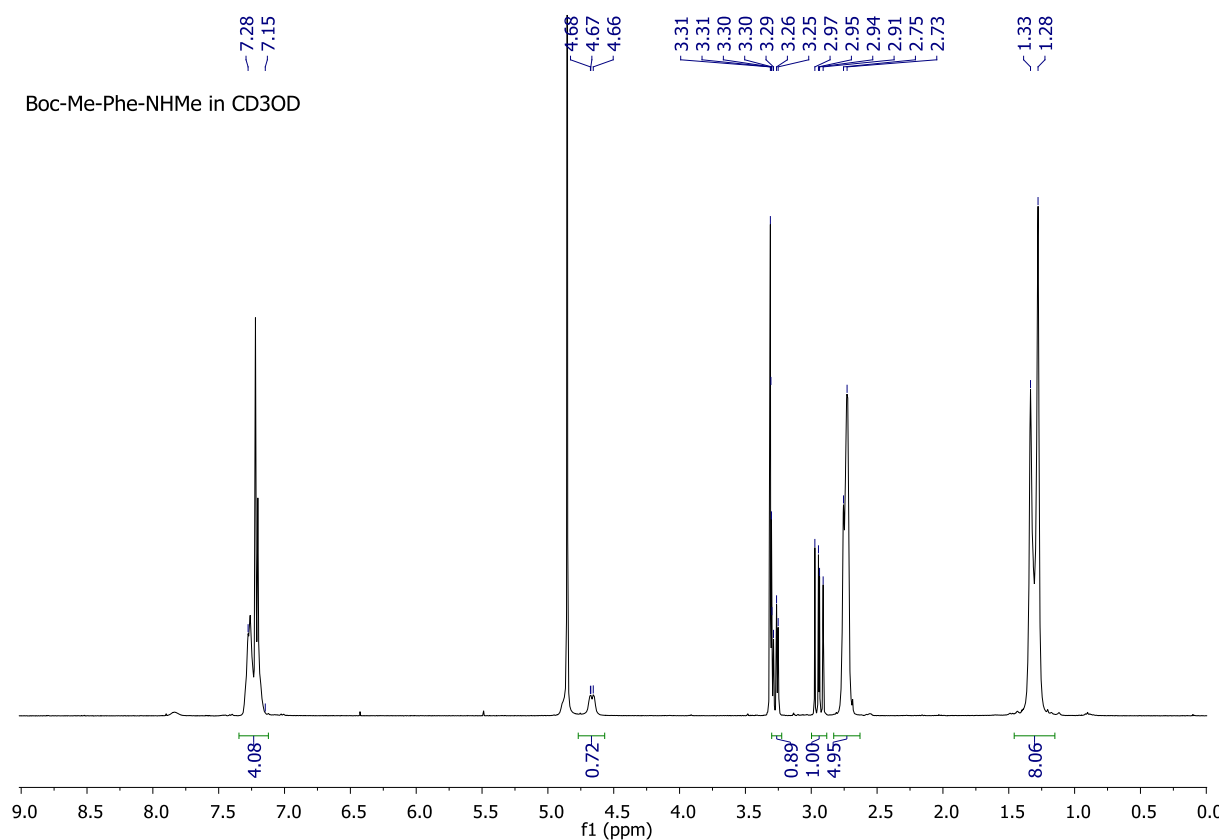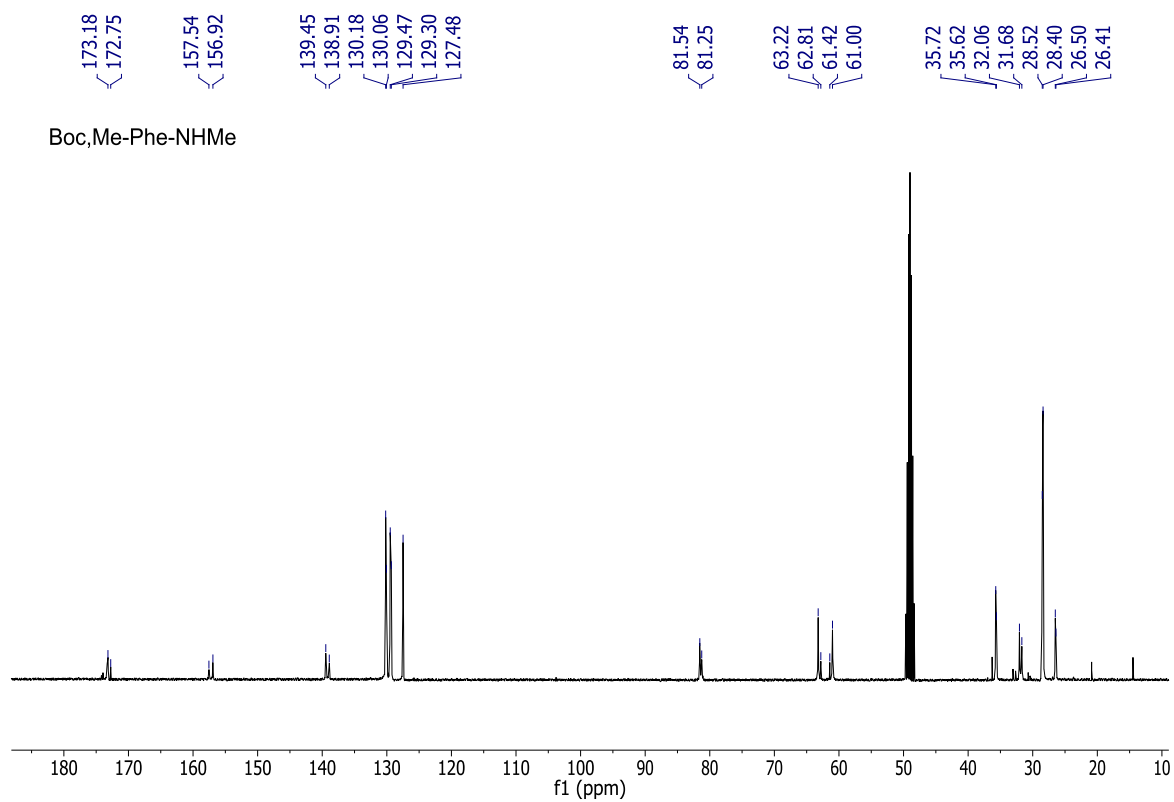

$^1\text{H}$  and  $^{13}\text{C}$  NMR spectra of **2d**.

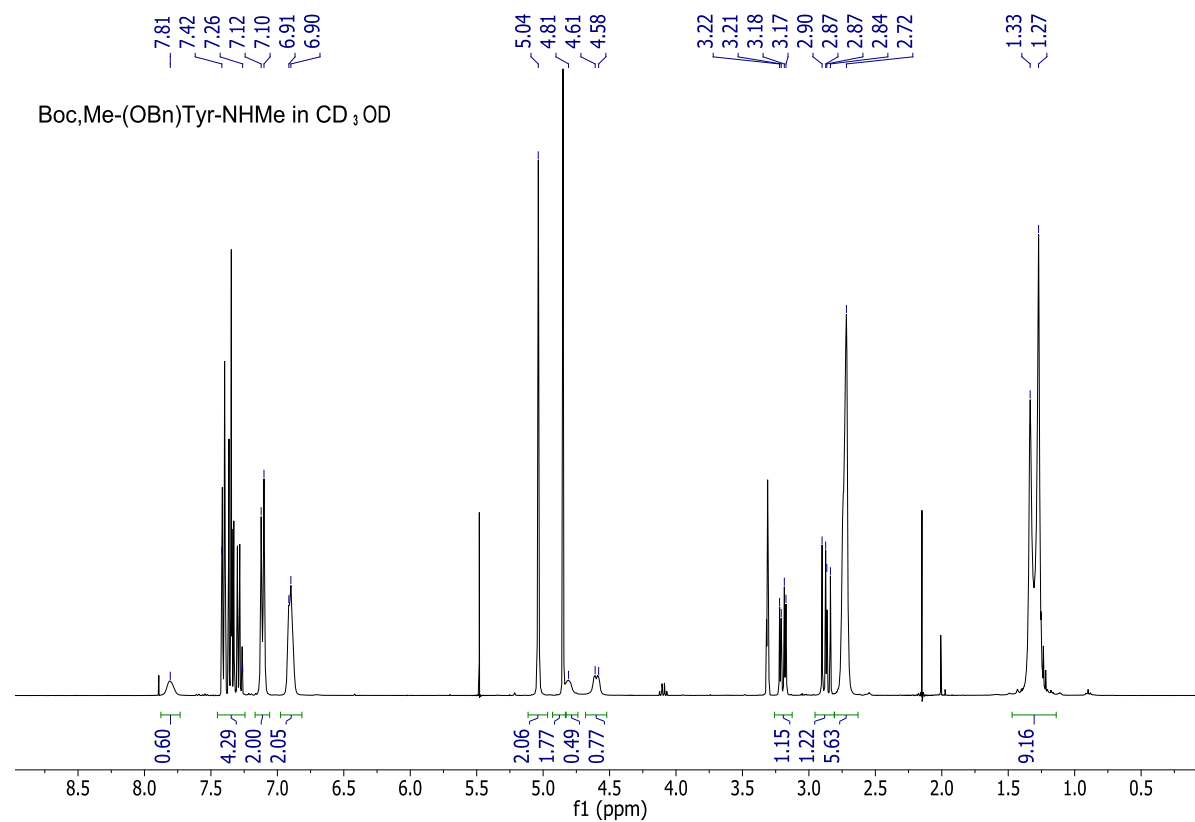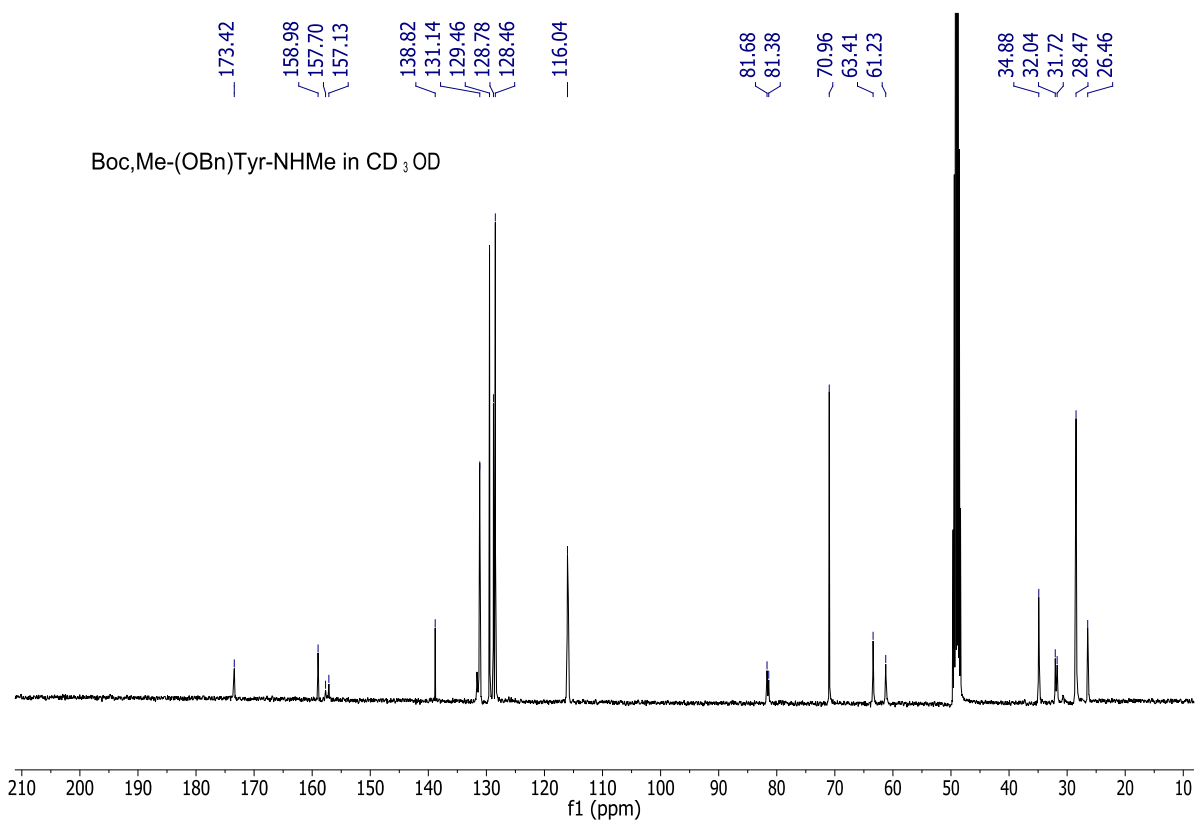



$^1\text{H}$ , gCOSY, gNOESY and  $^{13}\text{C}$  NMR spectra of **3a** in  $\text{CDCl}_3$

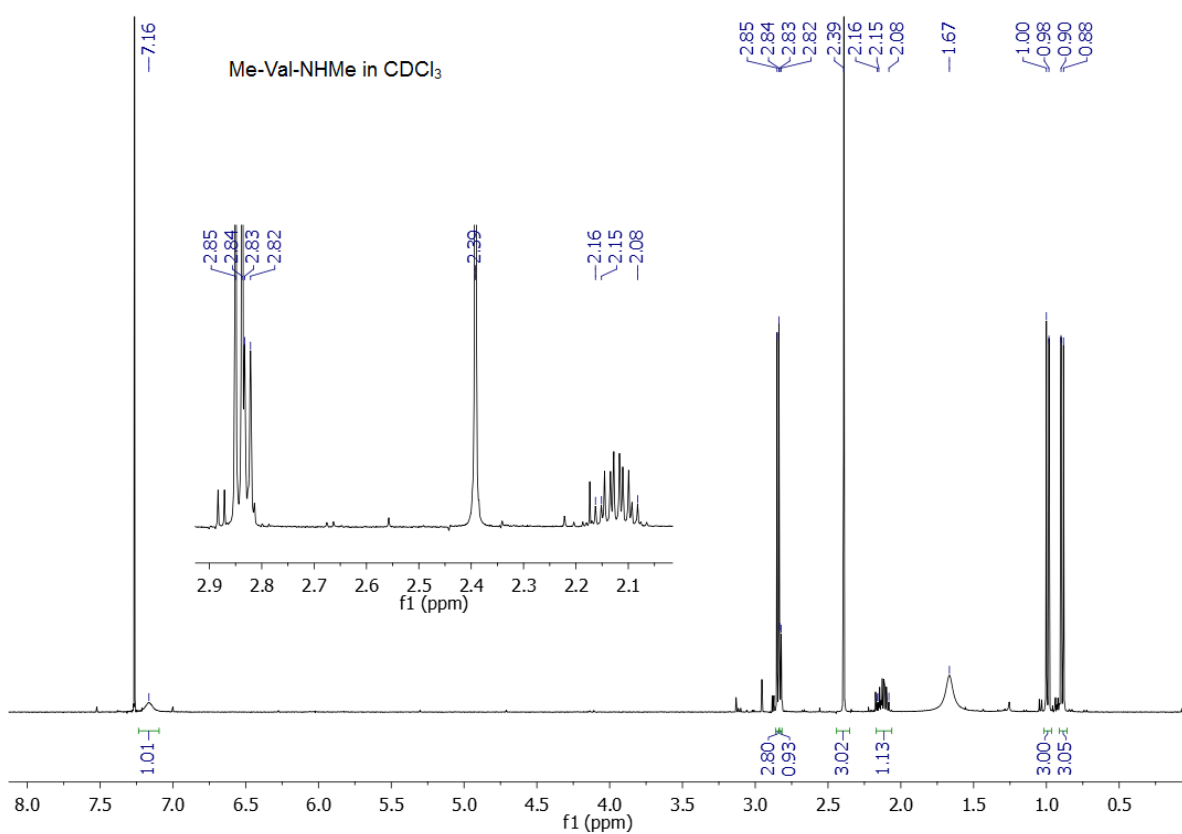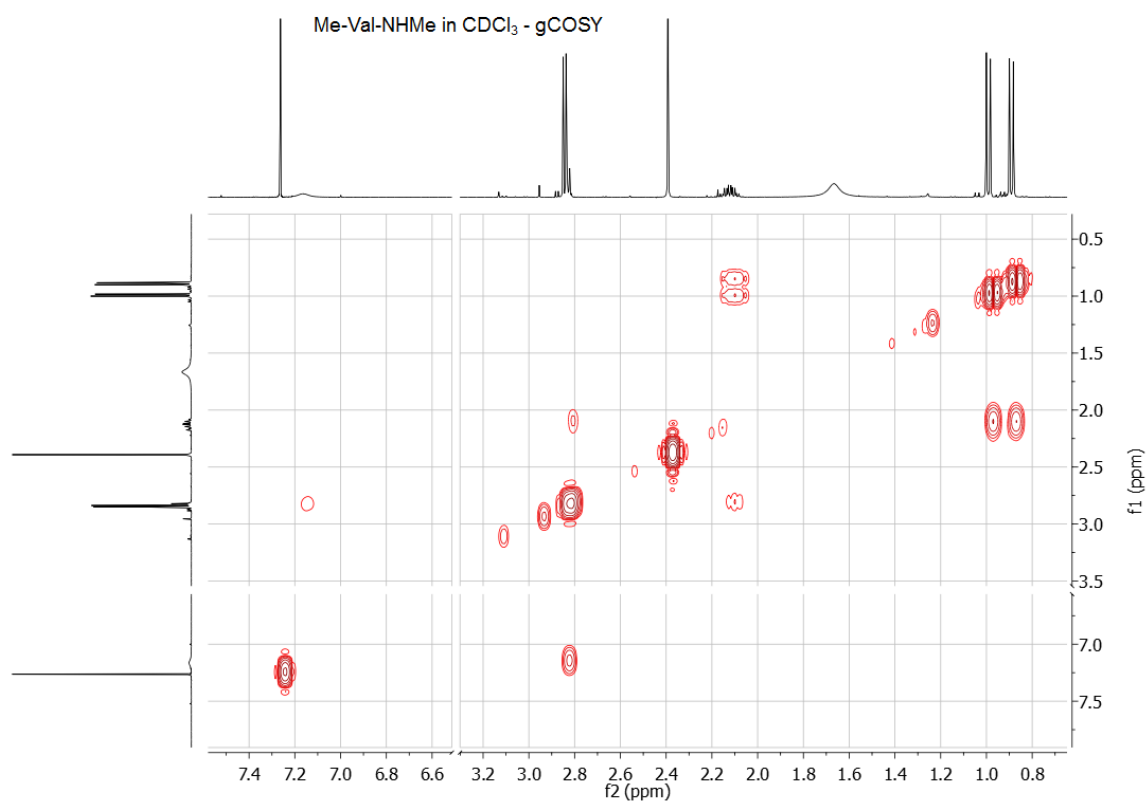

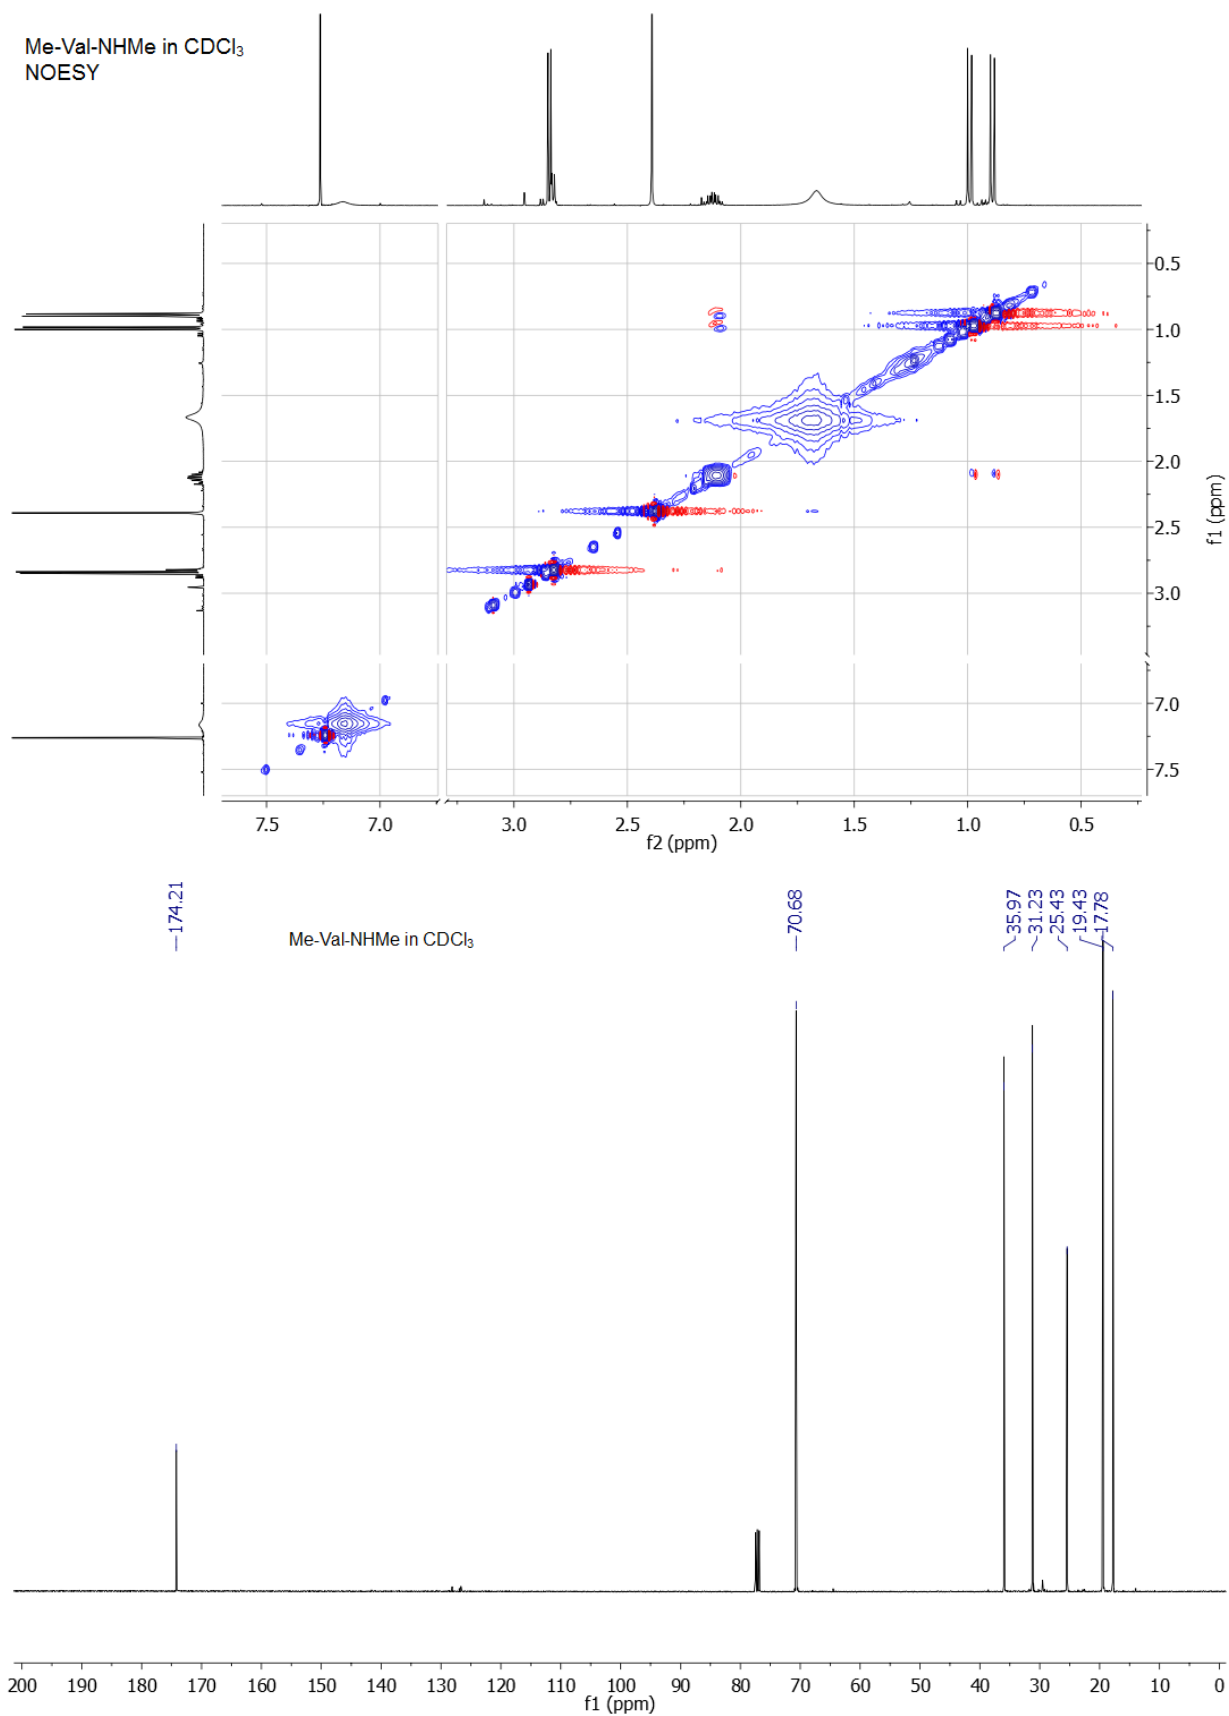

$^1\text{H}$ , gCOSY and gNOESY NMR spectra of **3a** in  $\text{CD}_3\text{CN}$

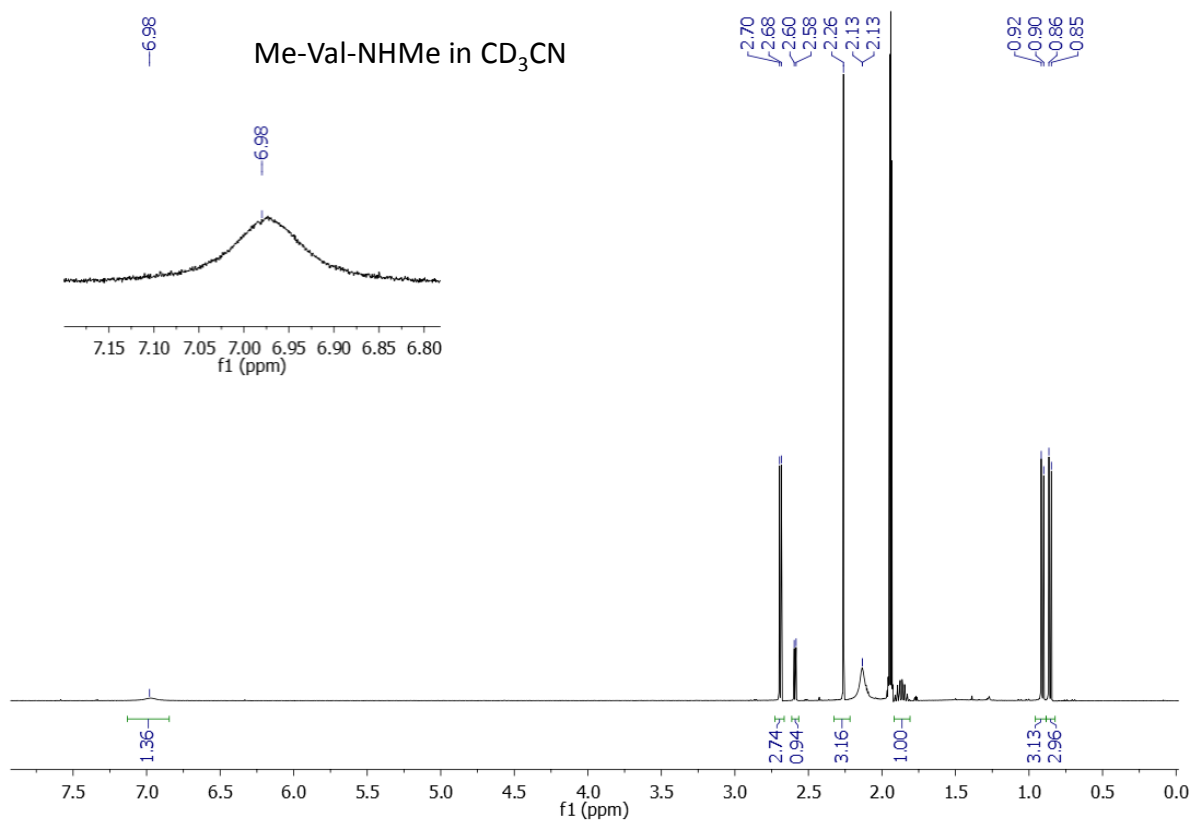

Me-Val-NHMe in  $\text{CD}_3\text{CN}$  - gCOSY

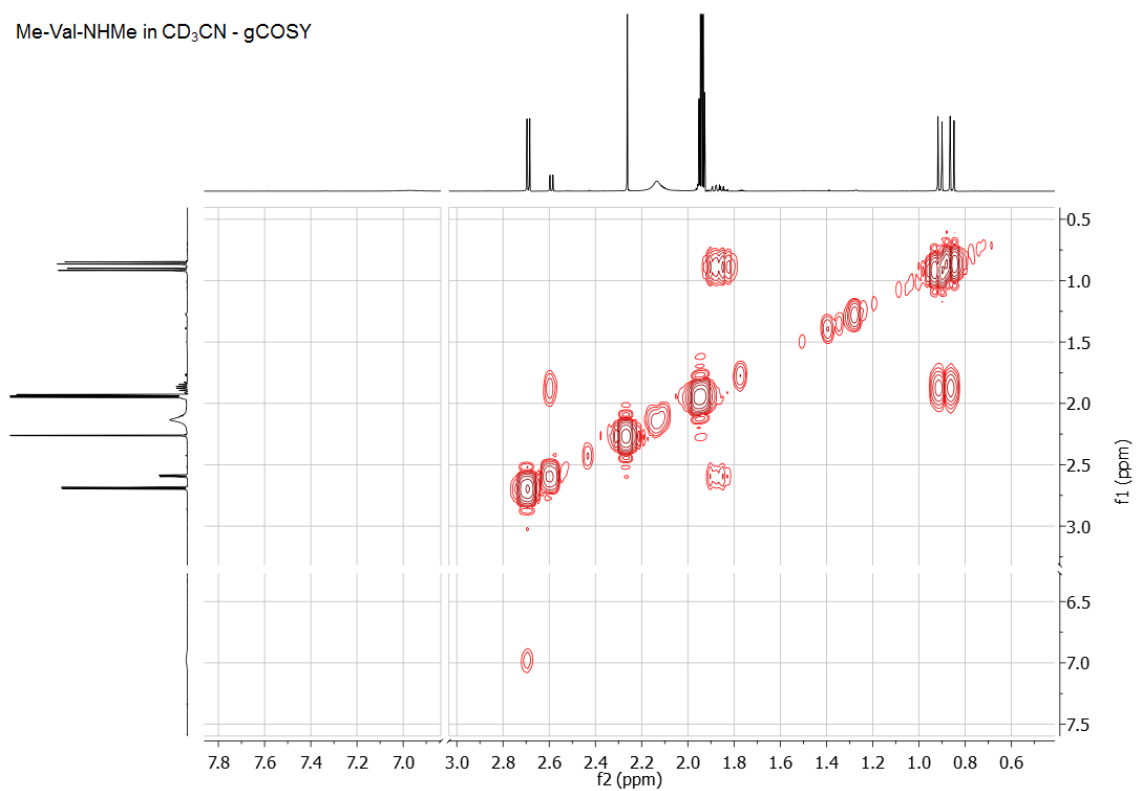

Me-Val-NHMe in CD<sub>3</sub>CN  
NOESY

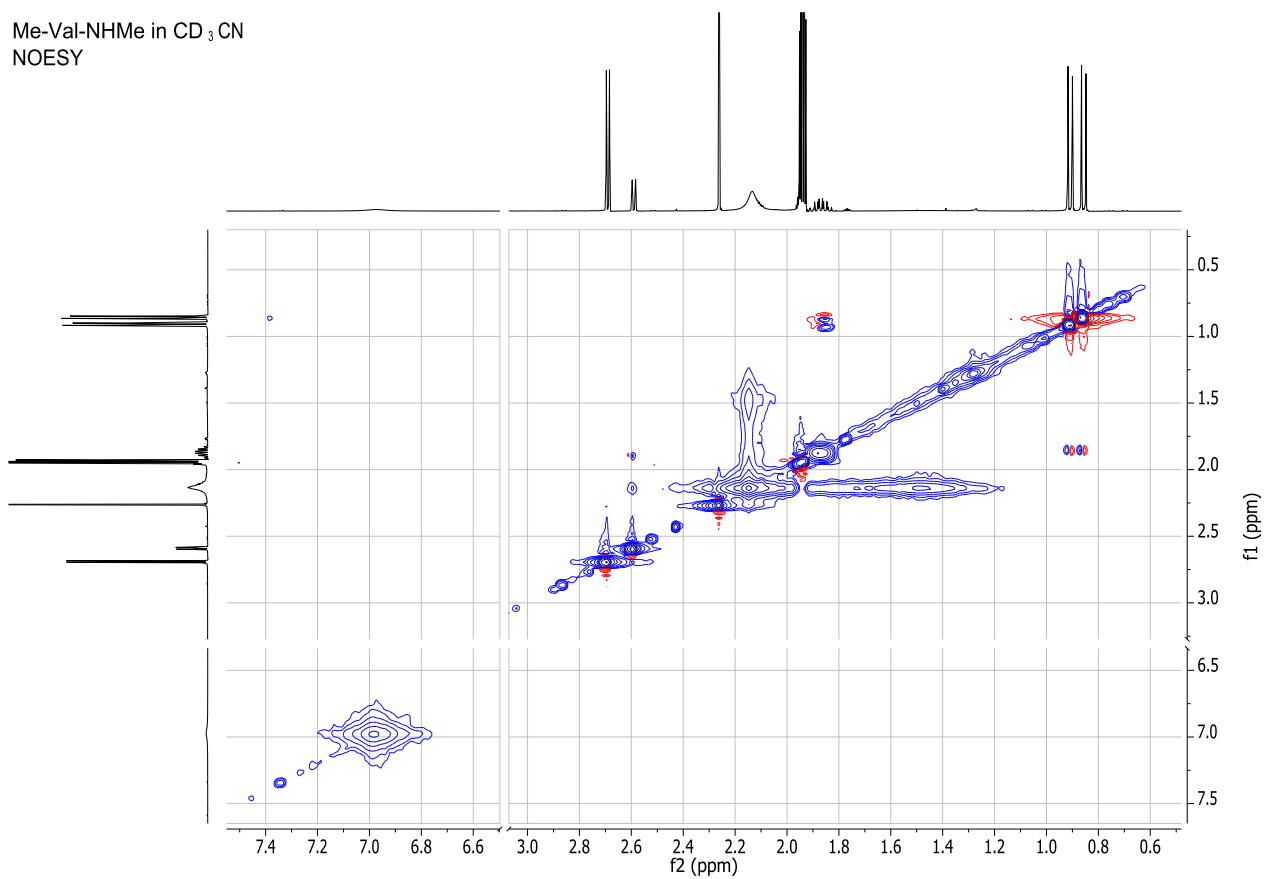

$^1\text{H}$ , gCOSY and gNOESY NMR spectra of **3a** in  $\text{dms}\text{-}d_6$

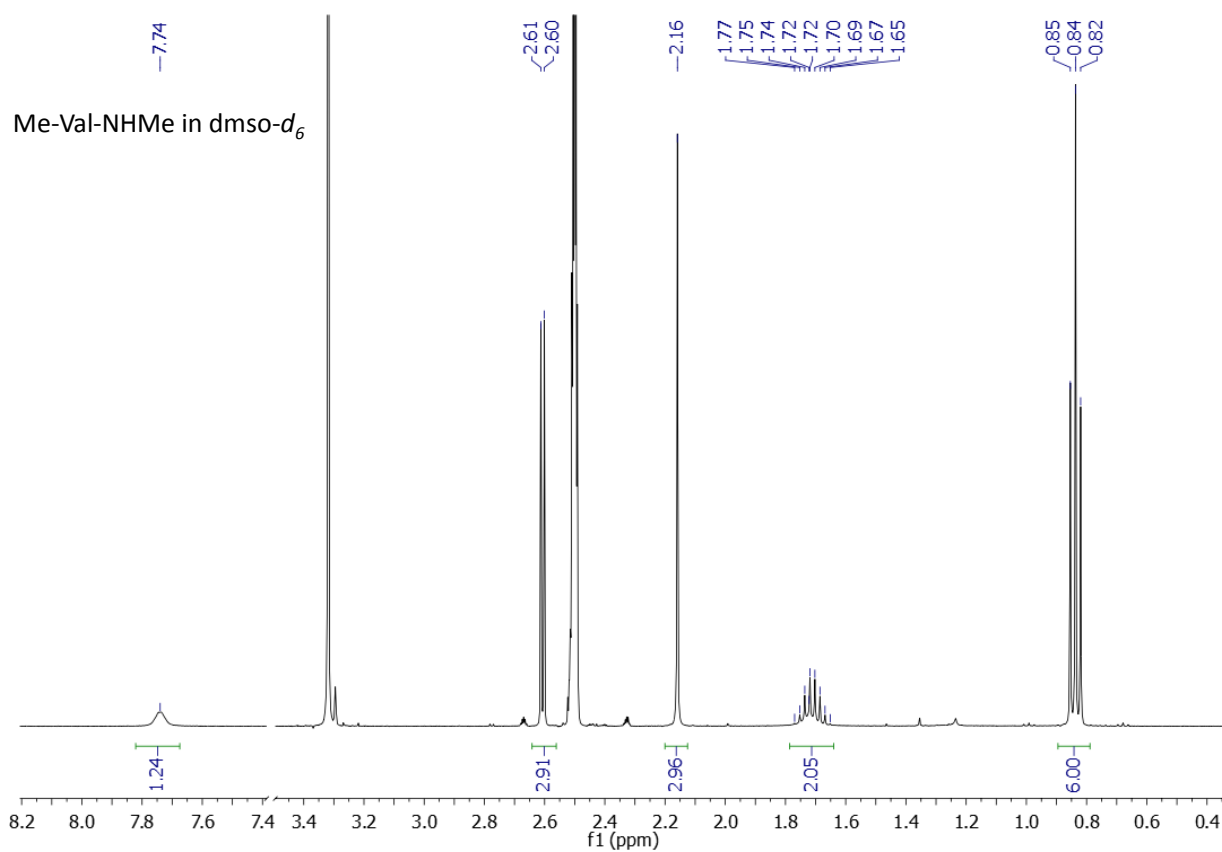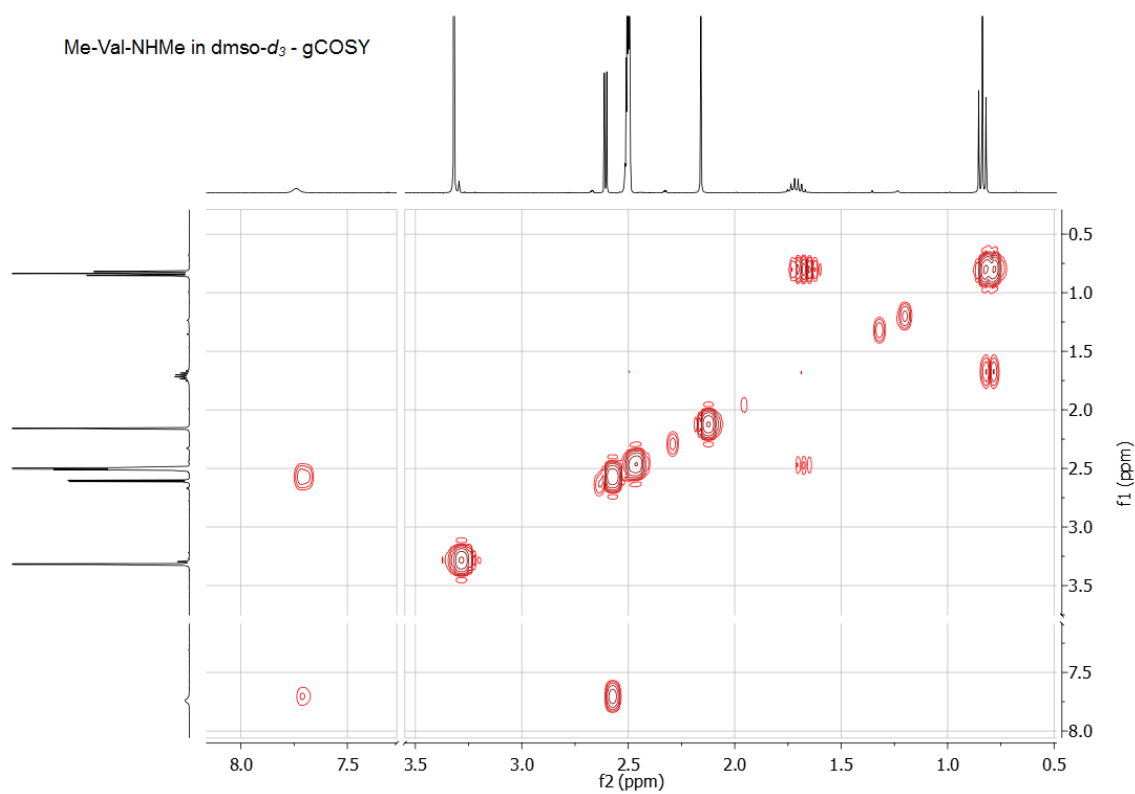

Me-Val-NHMe in  $\text{dms-}d_6$  - NOESY

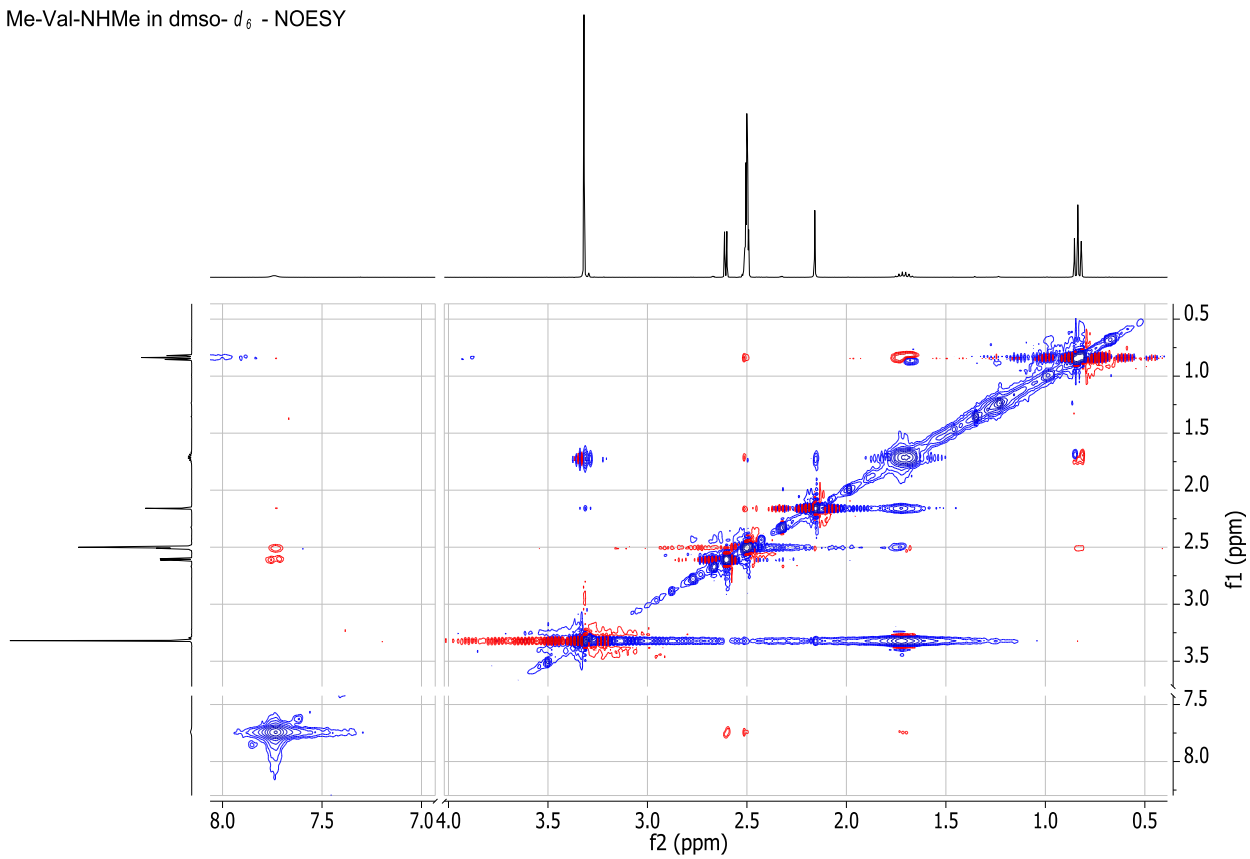

$^1\text{H}$ , gCOSY, gNOESY and  $^{13}\text{C}$  NMR spectra of **3b** in  $\text{CDCl}_3$

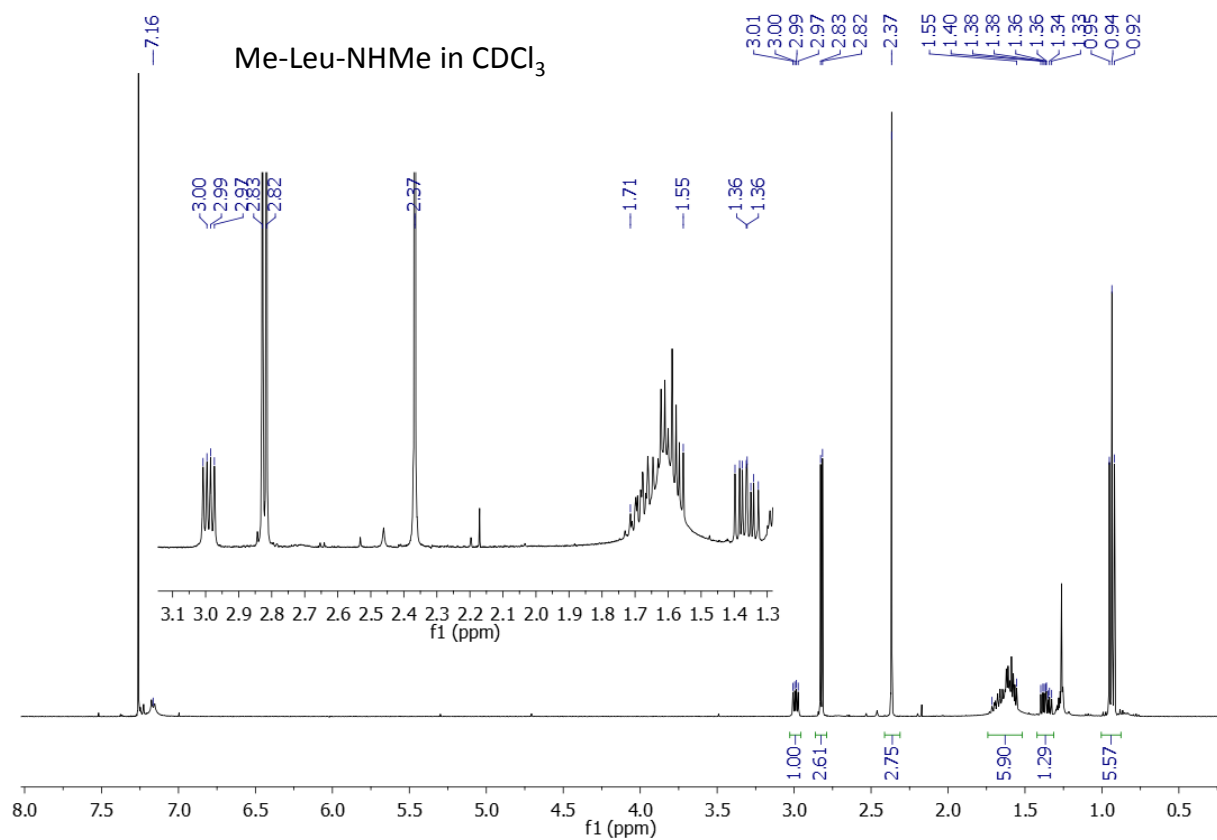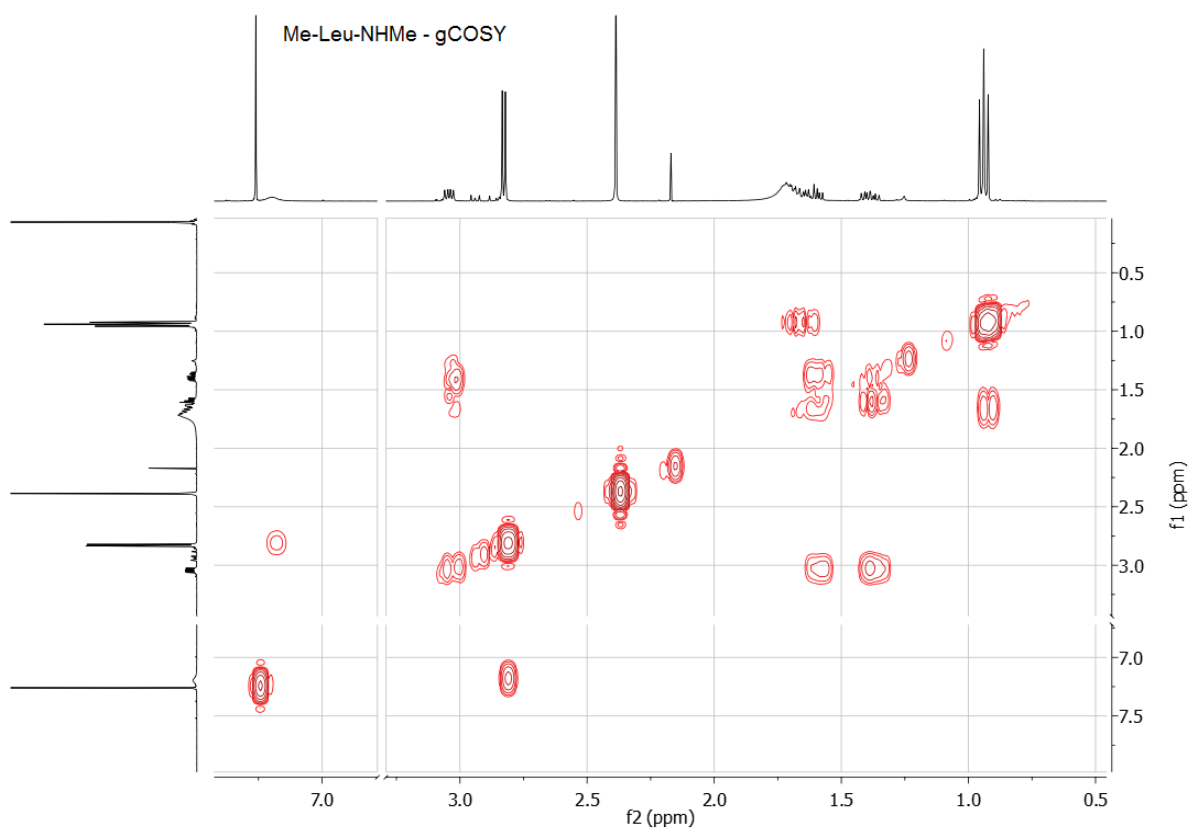

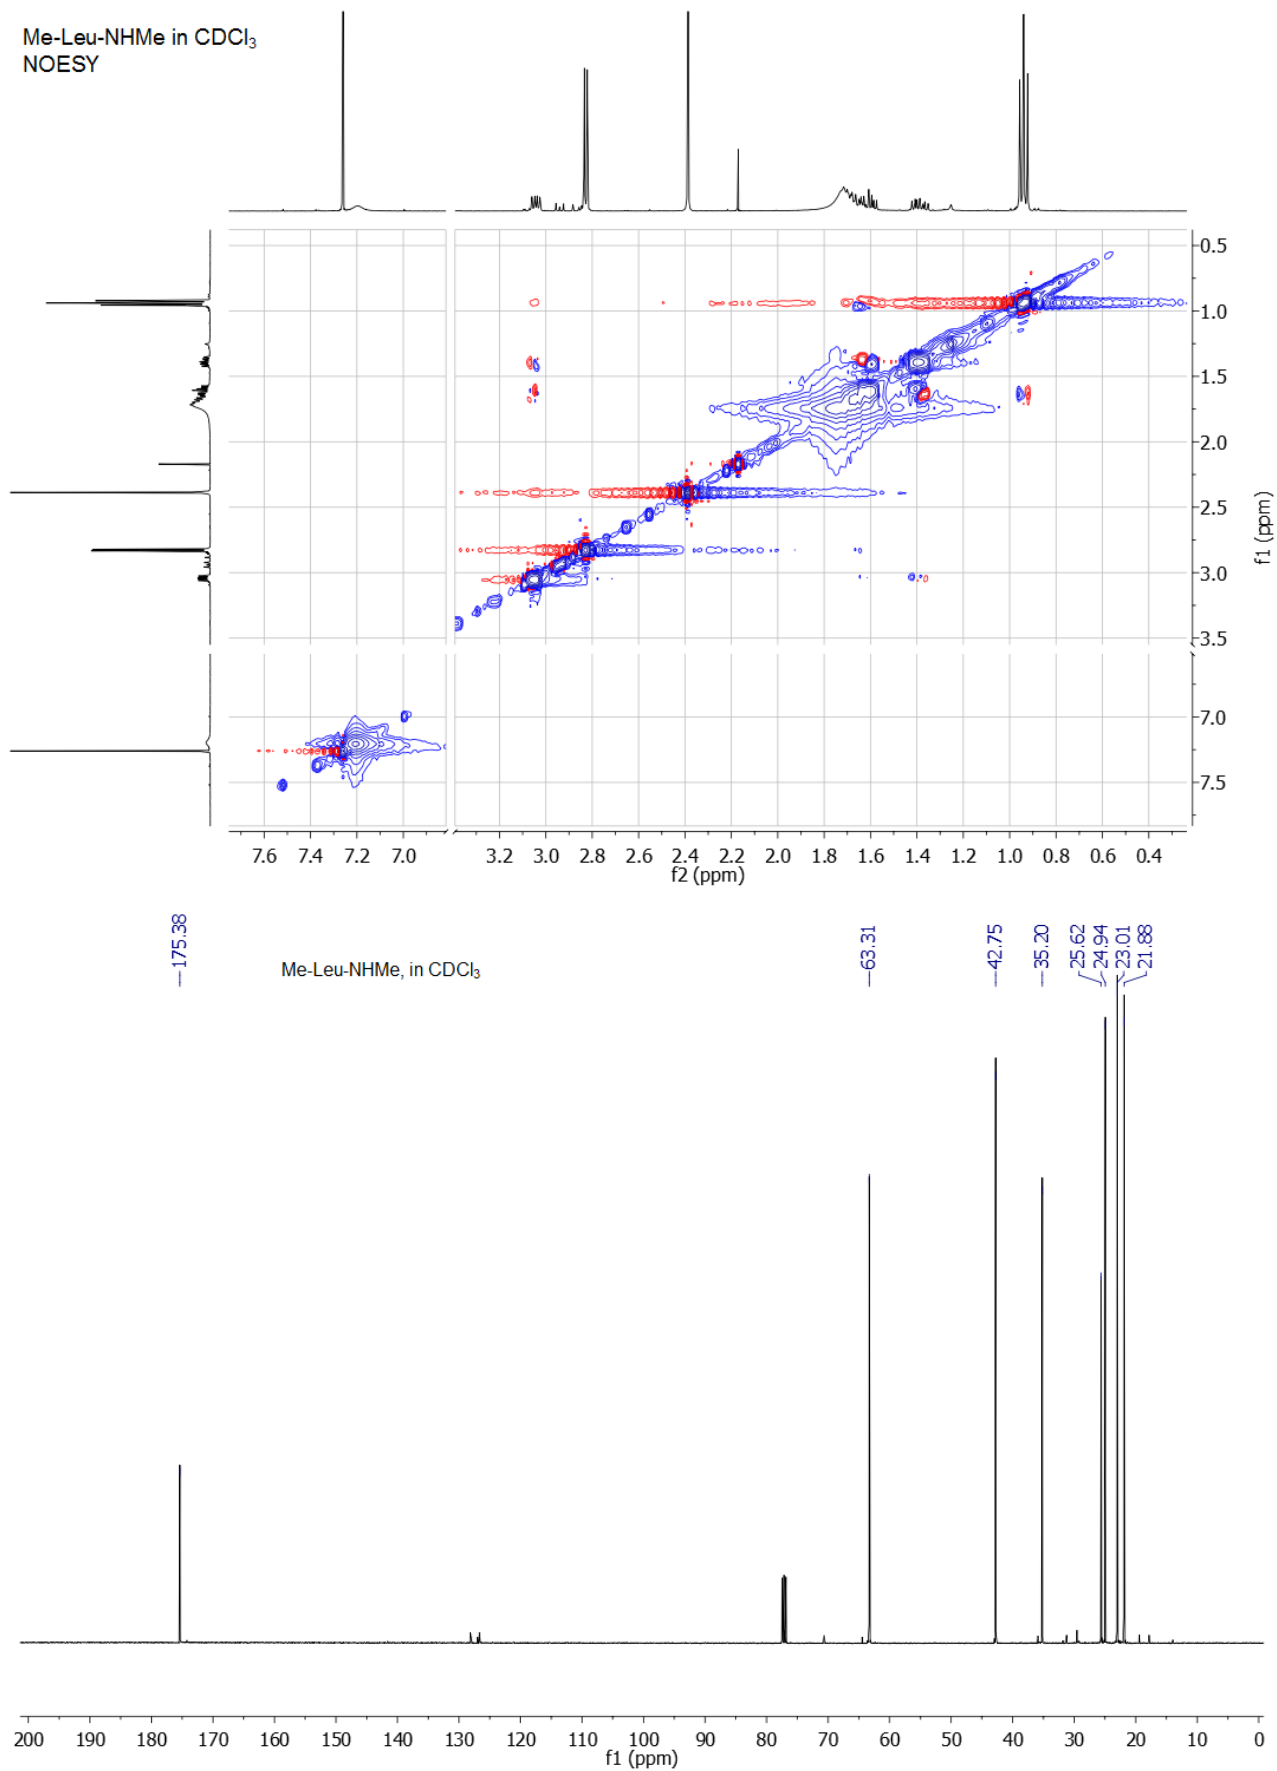



$^1\text{H}$ , gCOSY and gNOESY NMR spectra of **3b** in  $\text{CD}_3\text{CN}$

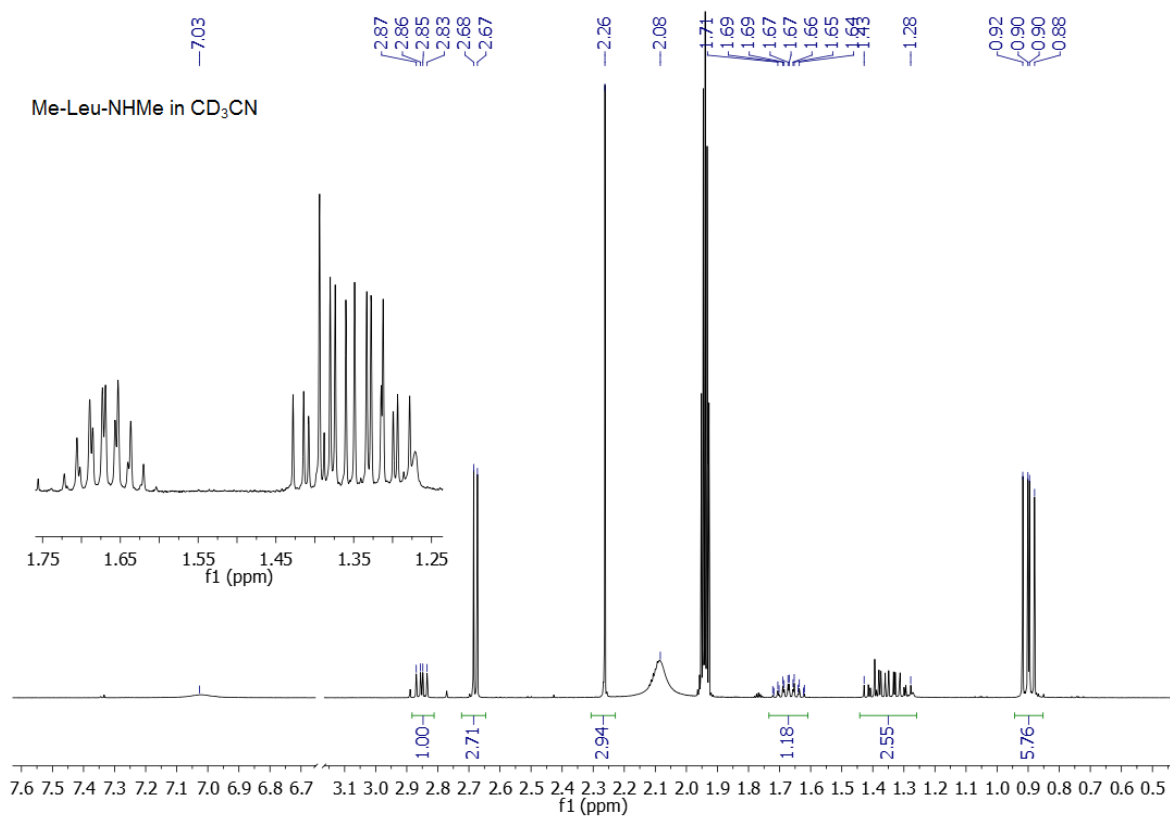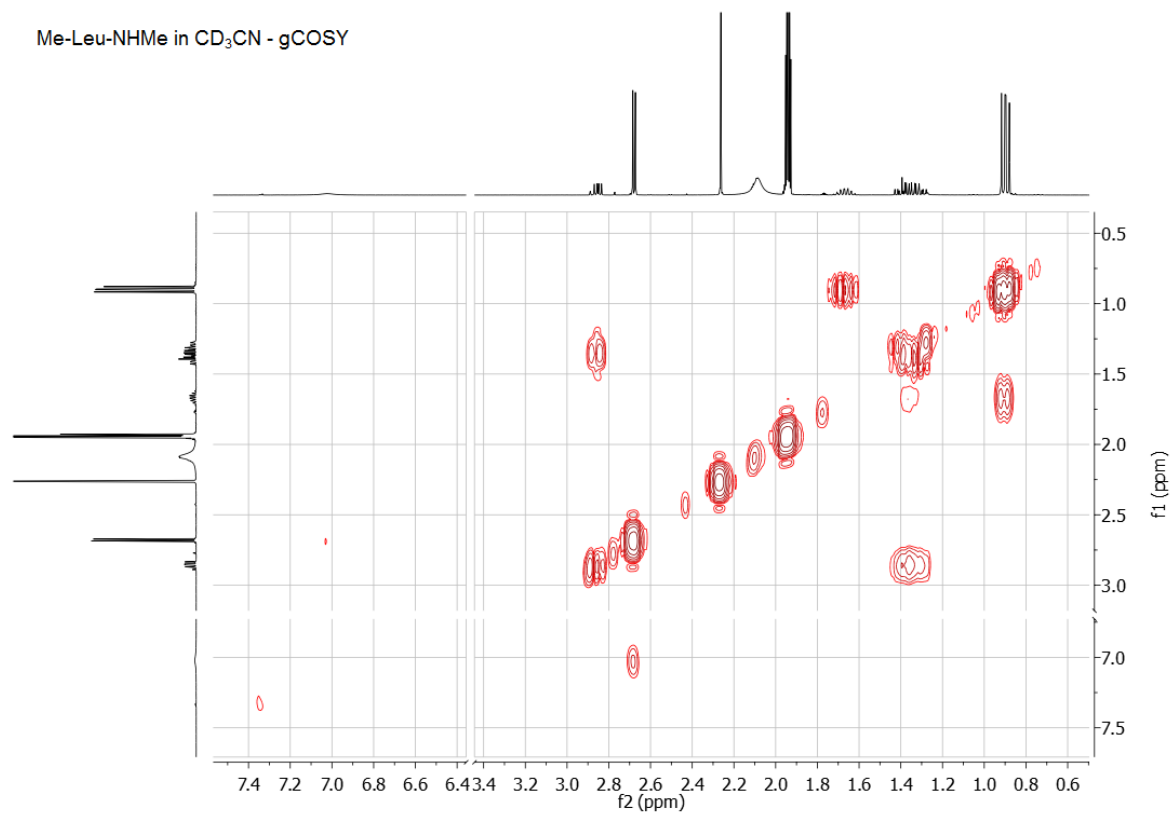

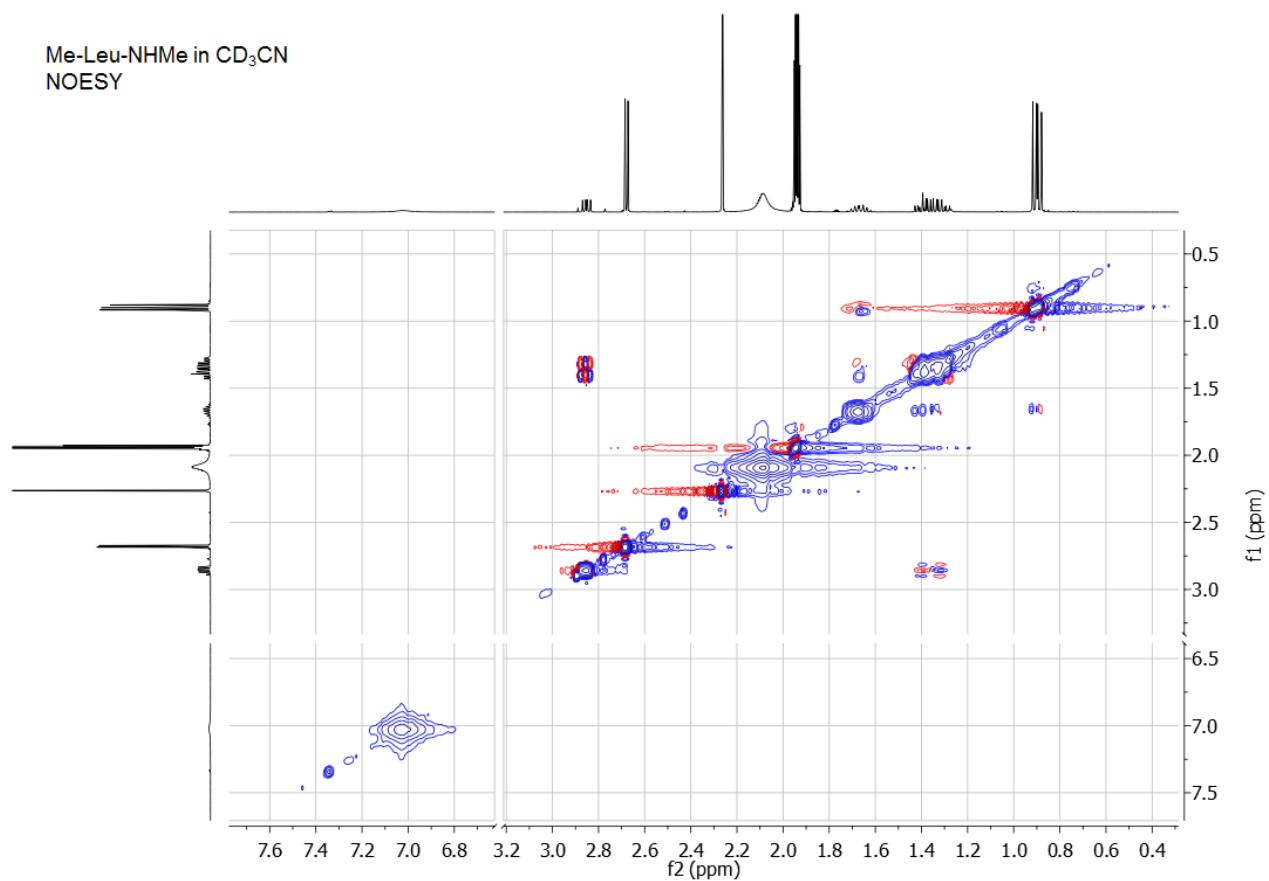

Experimental (down) and simulated (gNMR, up)  $^1\text{H}$  NMR spectra of **3b** in  $\text{CD}_3\text{CN}$  (500 MHz)

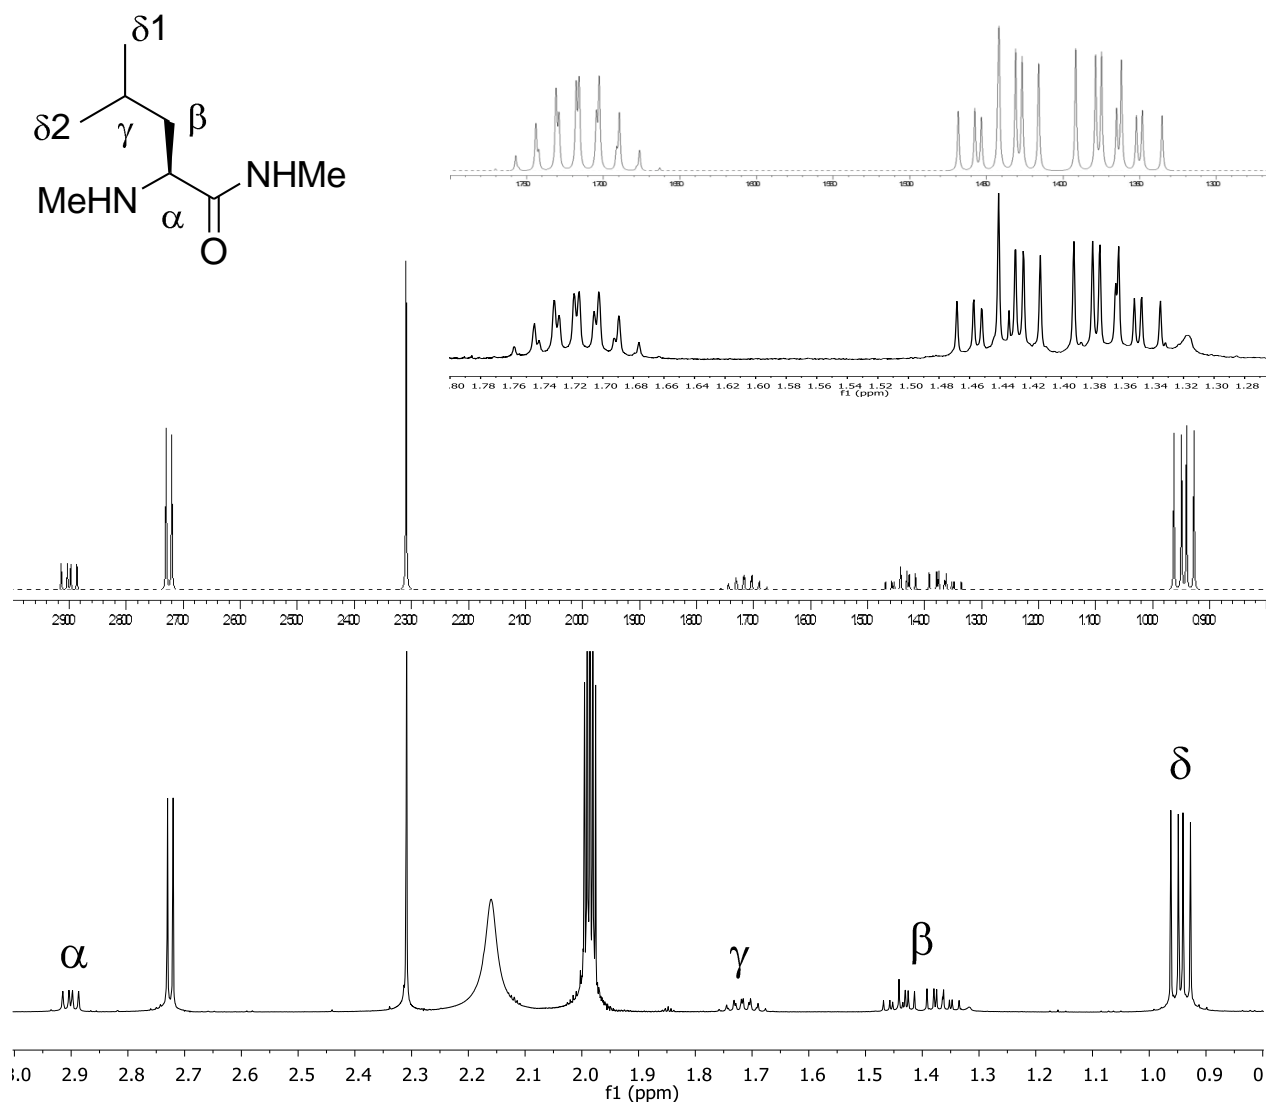

gDQCOSY spectrum of **3b** in CD<sub>3</sub>CN (500 MHz)

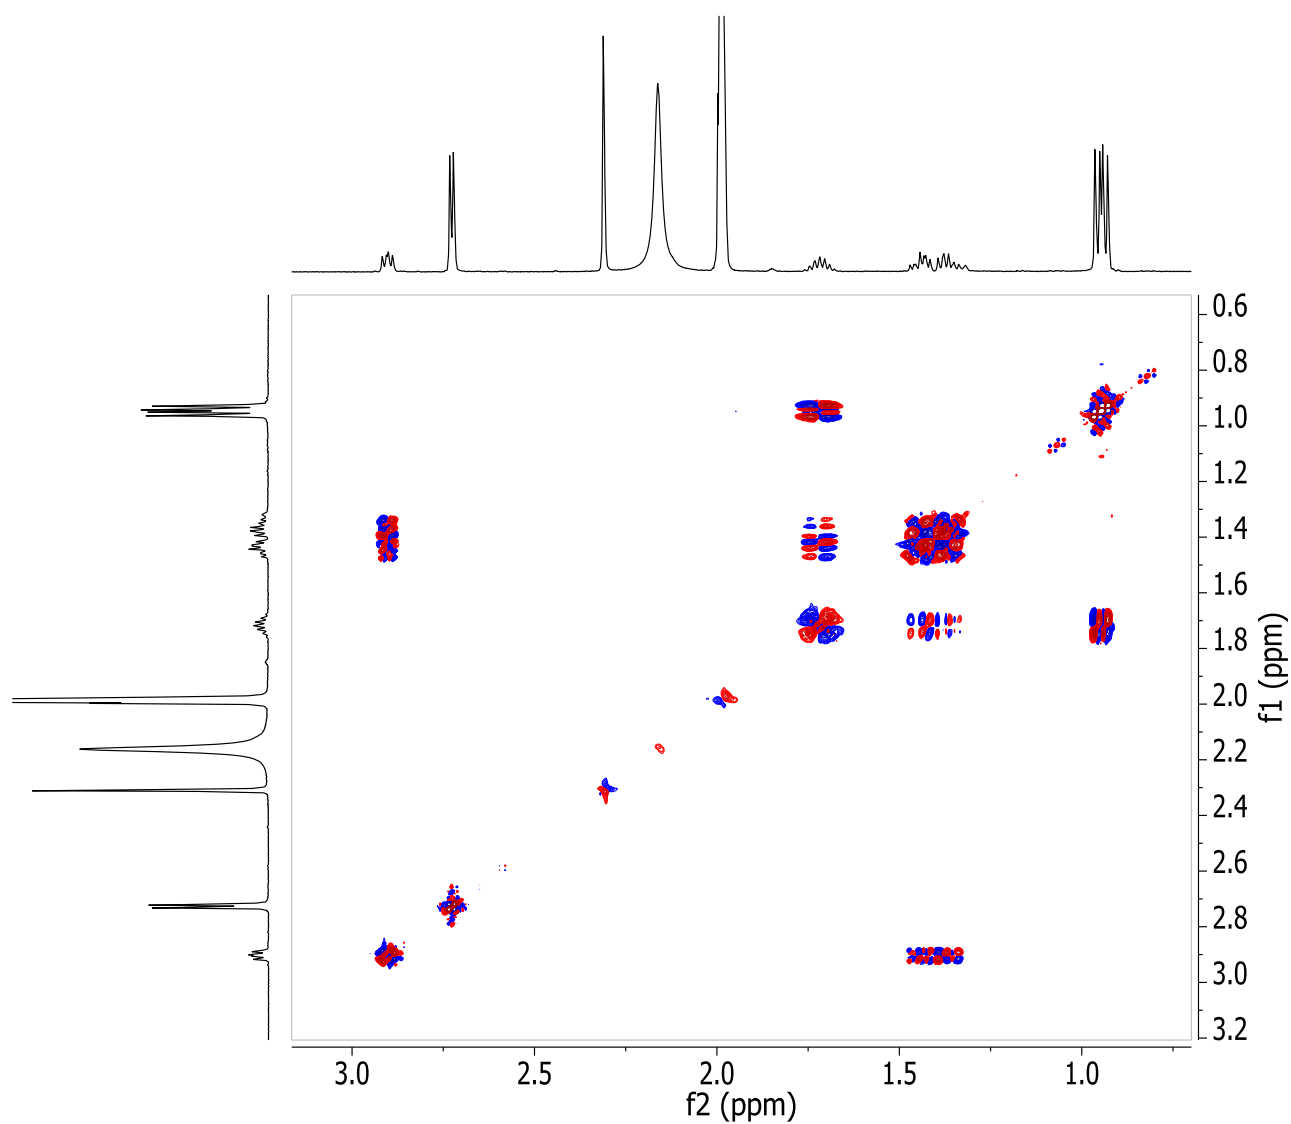

Zoomed regions of the gDQCOSY spectrum of **3b** in CD<sub>3</sub>CN (500 MHz)

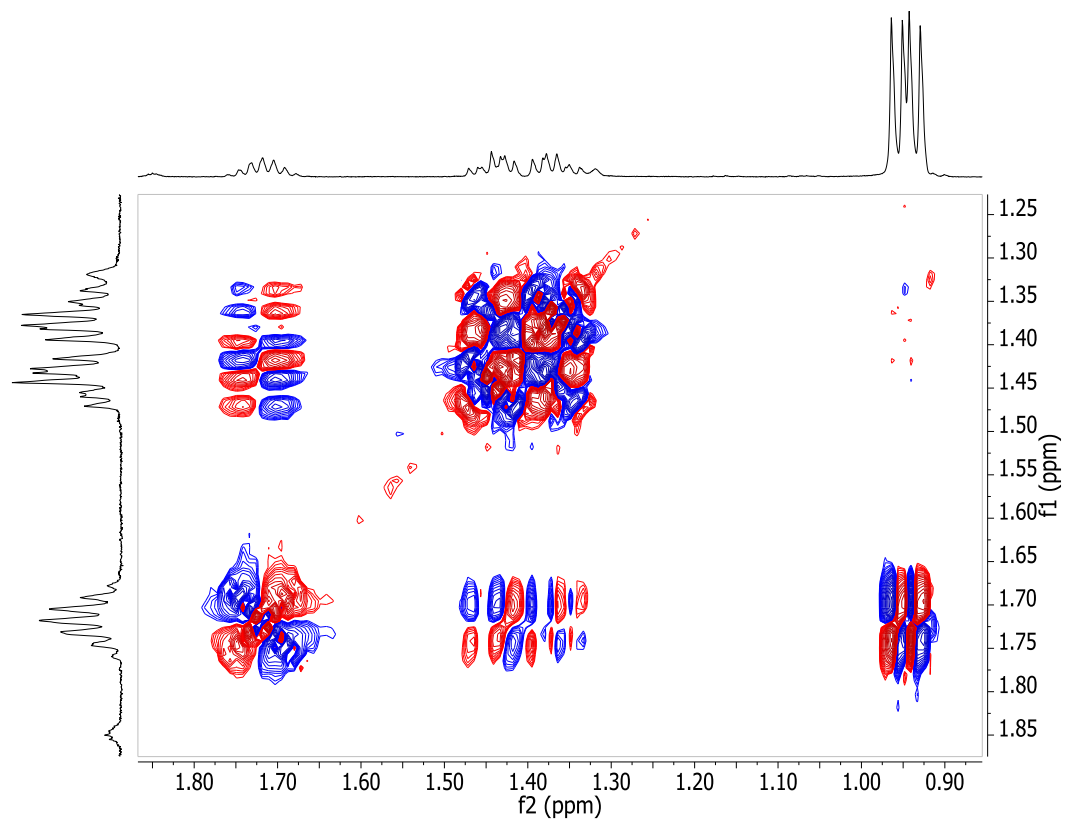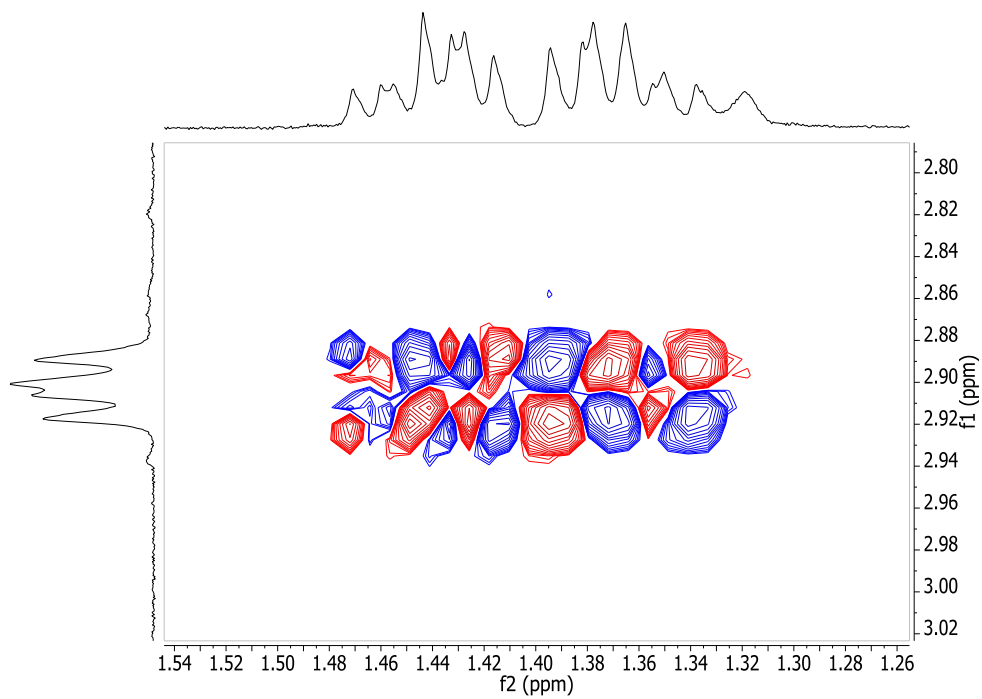

$^1\text{H}$ , gCOSY and gNOESY NMR spectra of **3b** in  $\text{dms}\text{-}d_6$

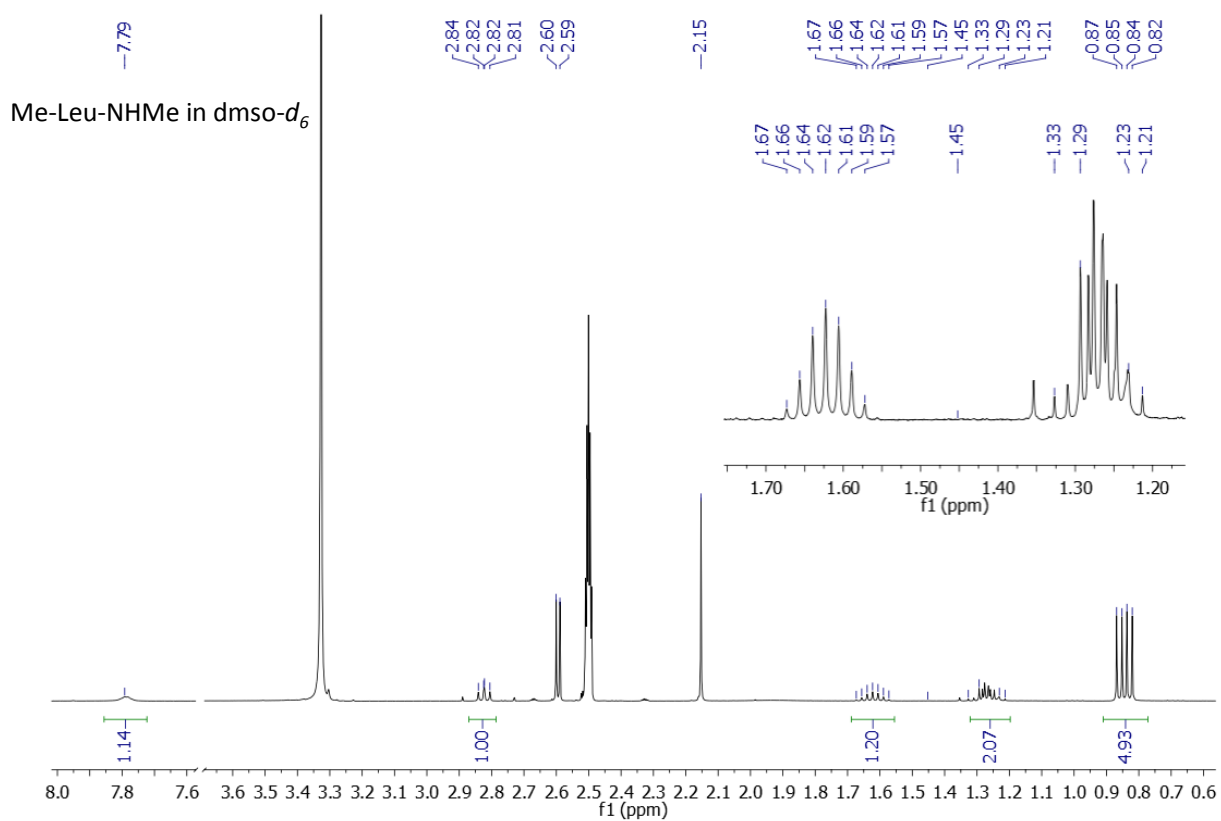

Me-Leu-NHMe in  $\text{dms}\text{-}d_6$  - gCOSY

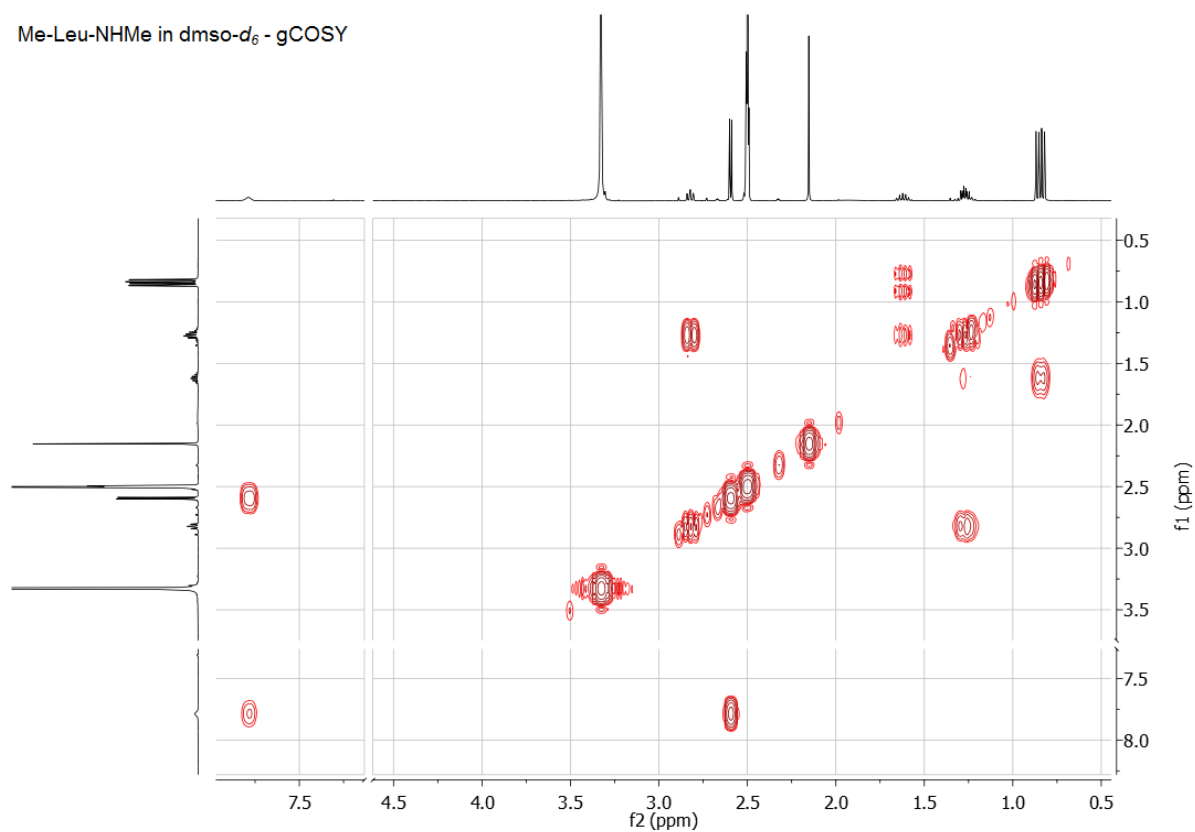

Me-Leu-NHMe in  $\text{dms-}d_6$   
NOESY

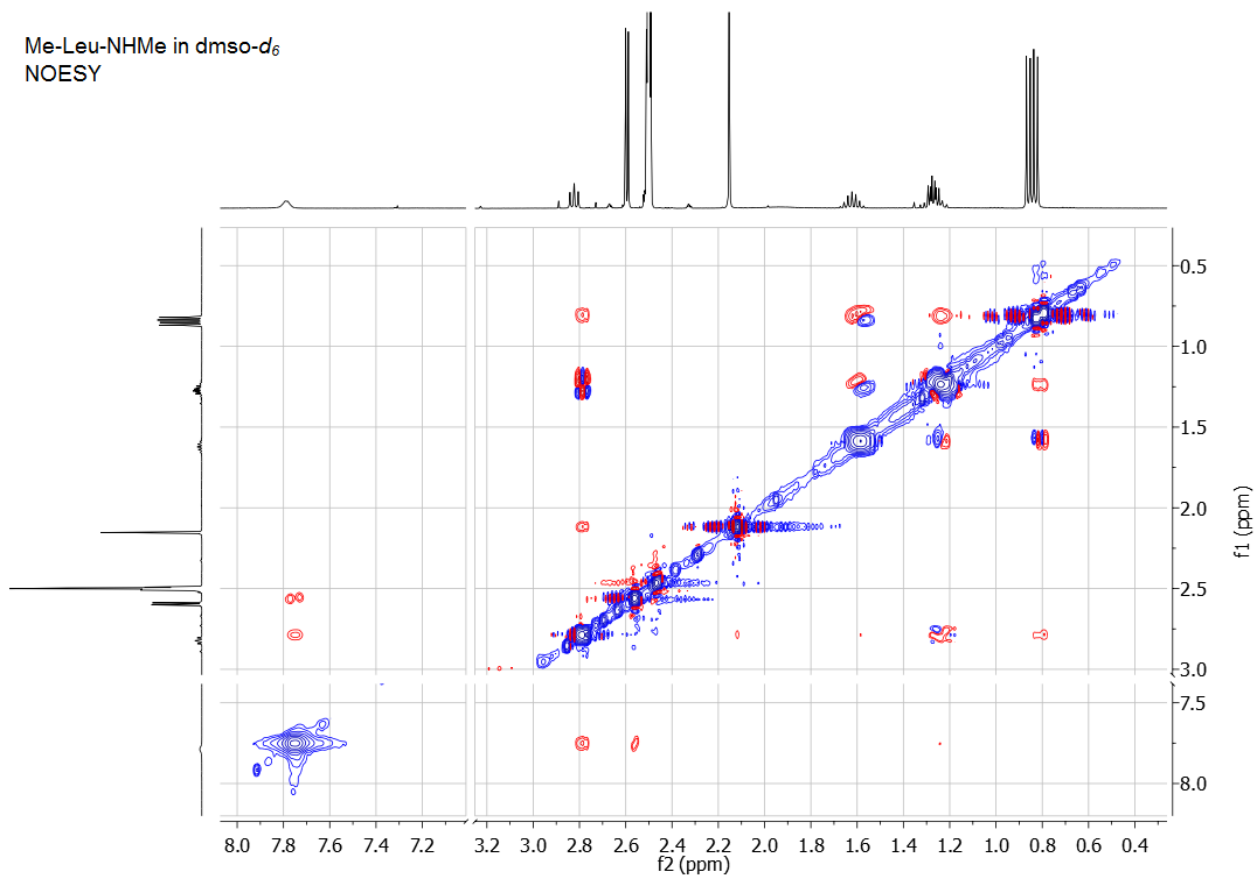

$^1\text{H}$ , gCOSY, gNOESY and  $^{13}\text{C}$  NMR spectra of **3c** in  $\text{CDCl}_3$

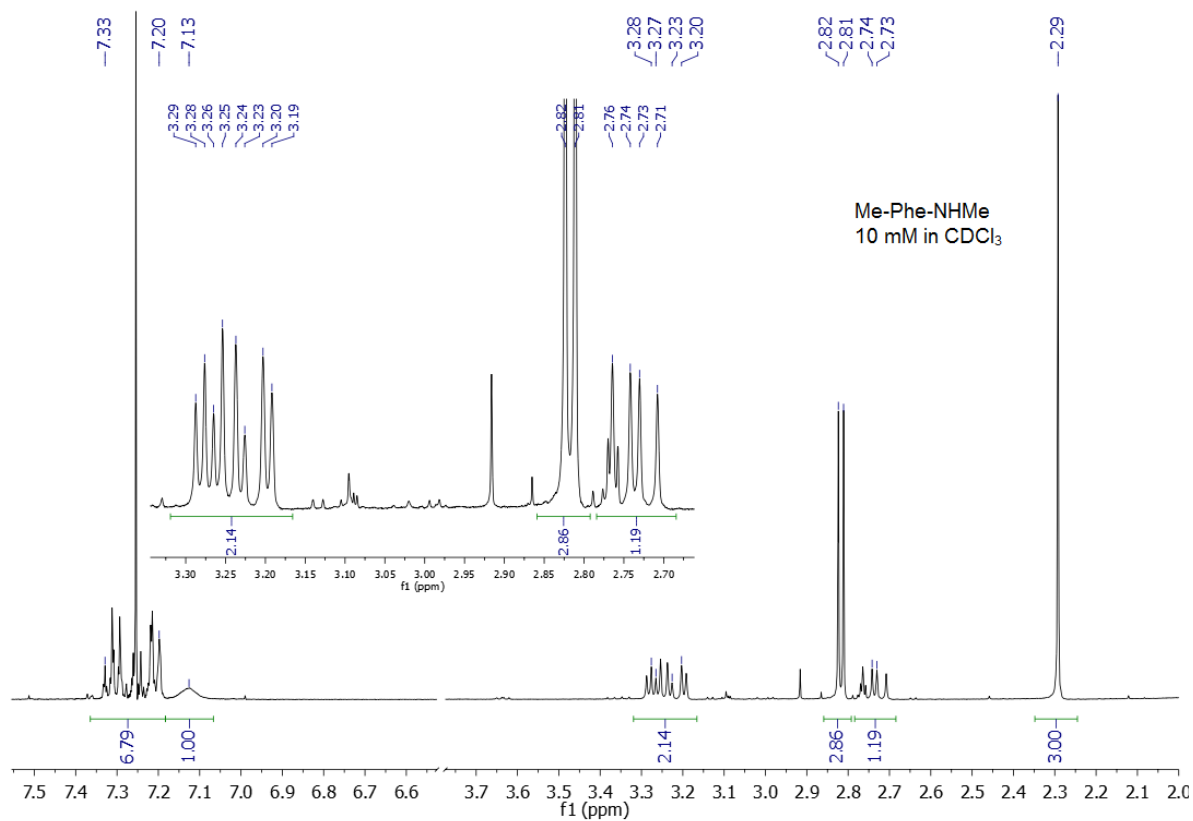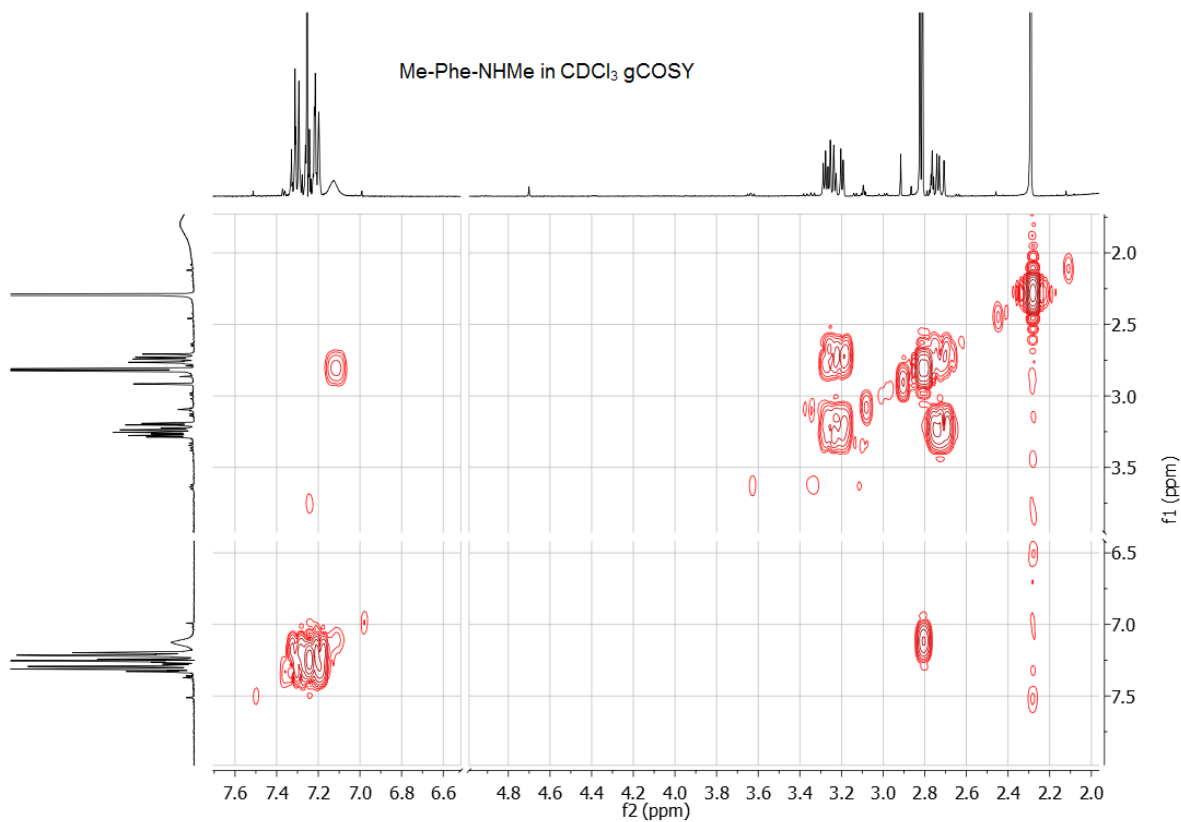



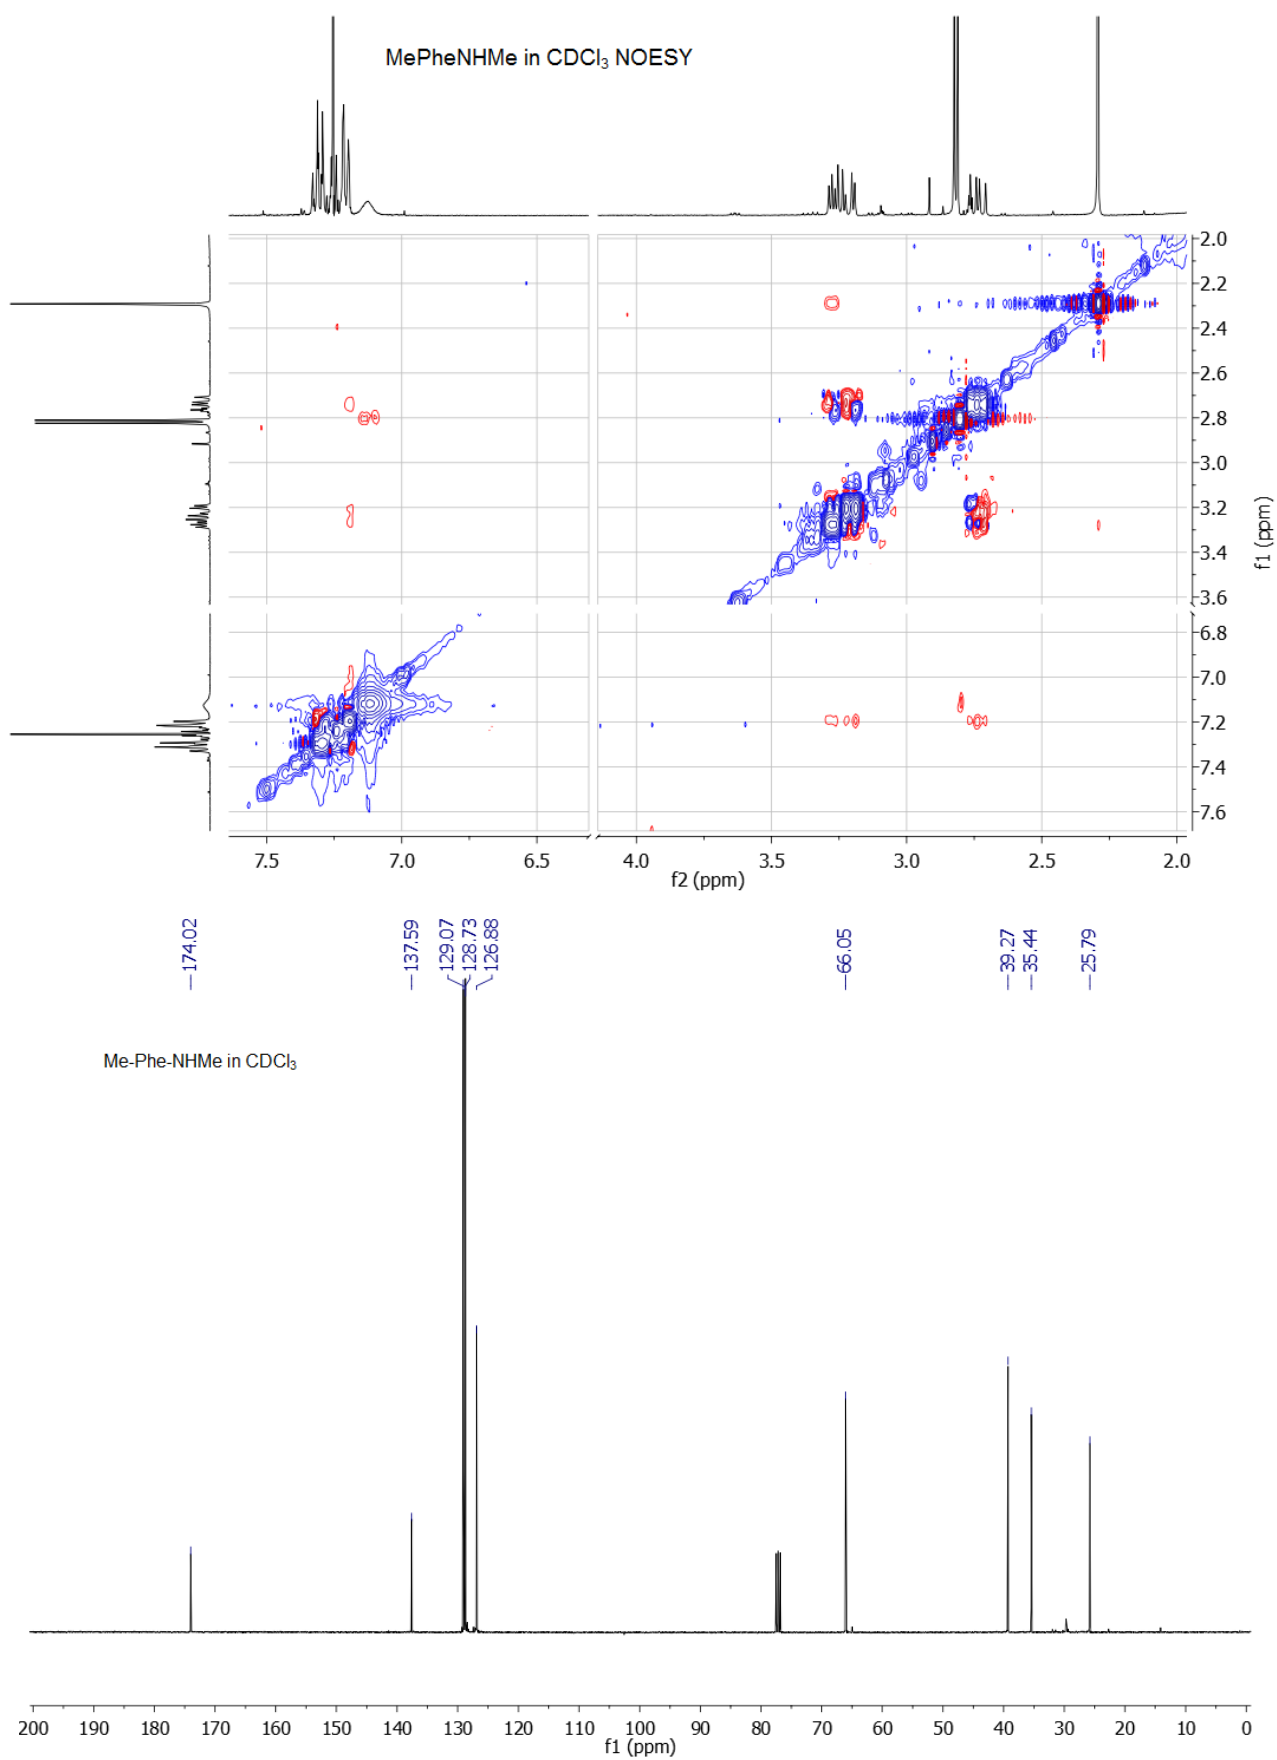

$^1\text{H}$ , gCOSY and gNOESY spectra of **3c** in  $\text{CD}_3\text{CN}$

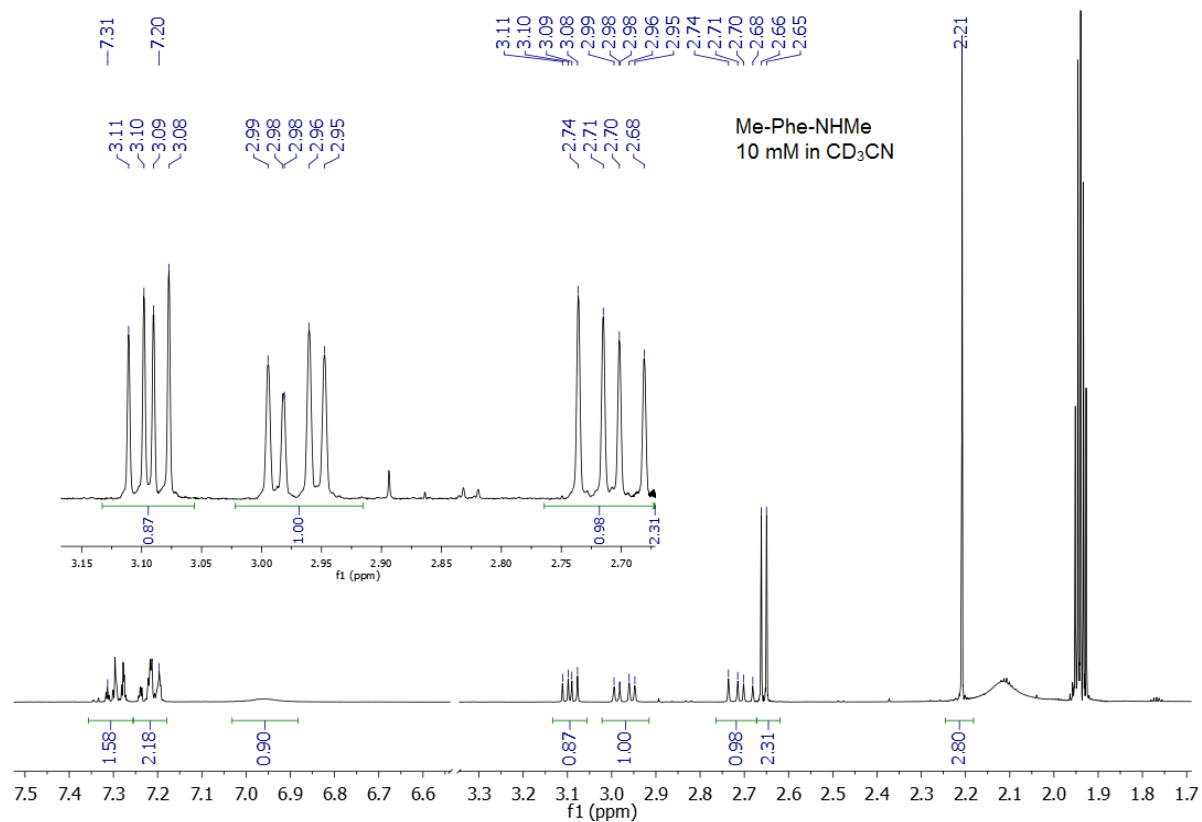

Me-Phe-NHMe in  $\text{CD}_3\text{CN}$  - gCOSY

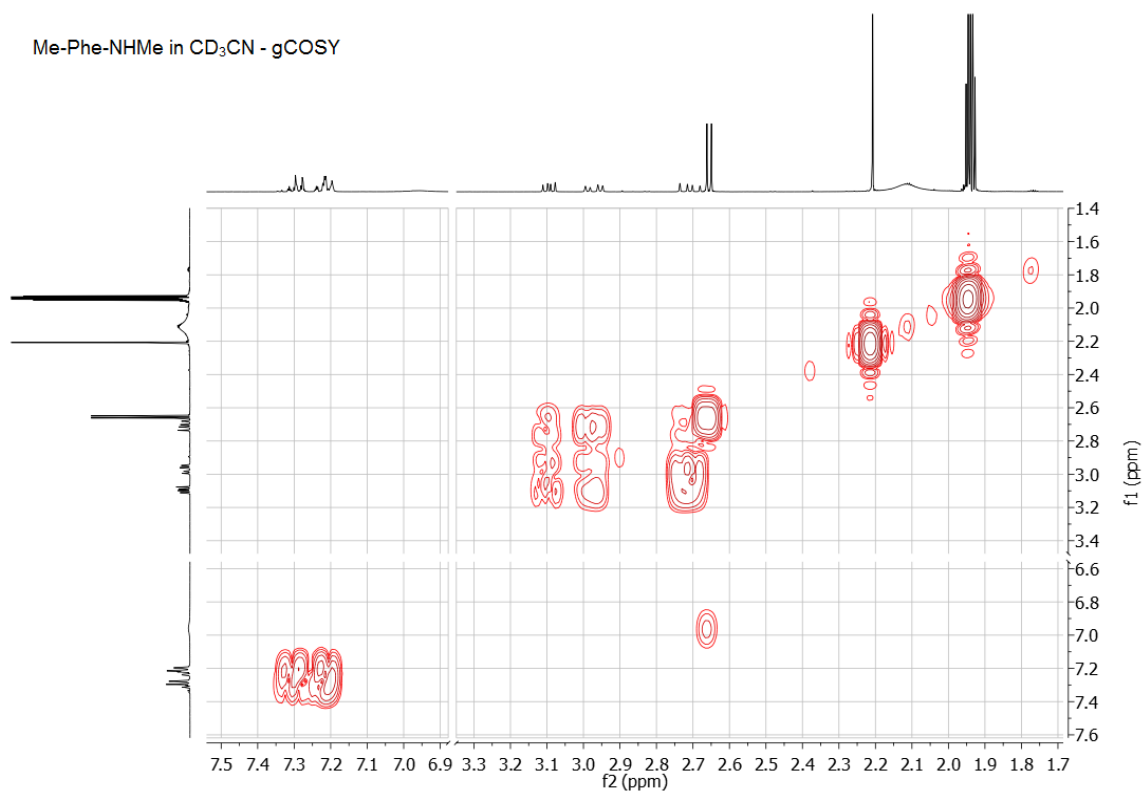

Me-Phe-NHMe in CD<sub>3</sub>CN - NOESY

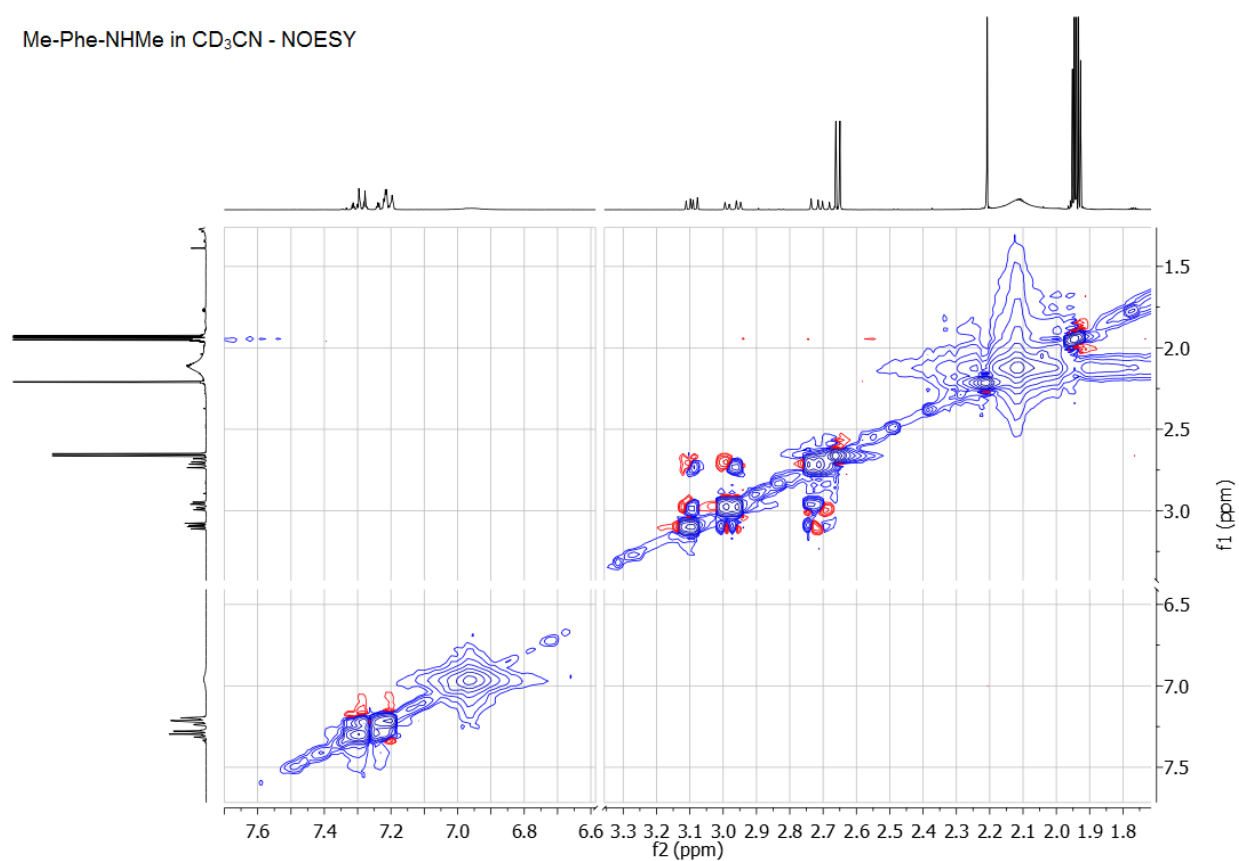

$^1\text{H}$ , gCOSY and gNOESY spectra of **3c** in  $\text{dms}\text{-}d_6$

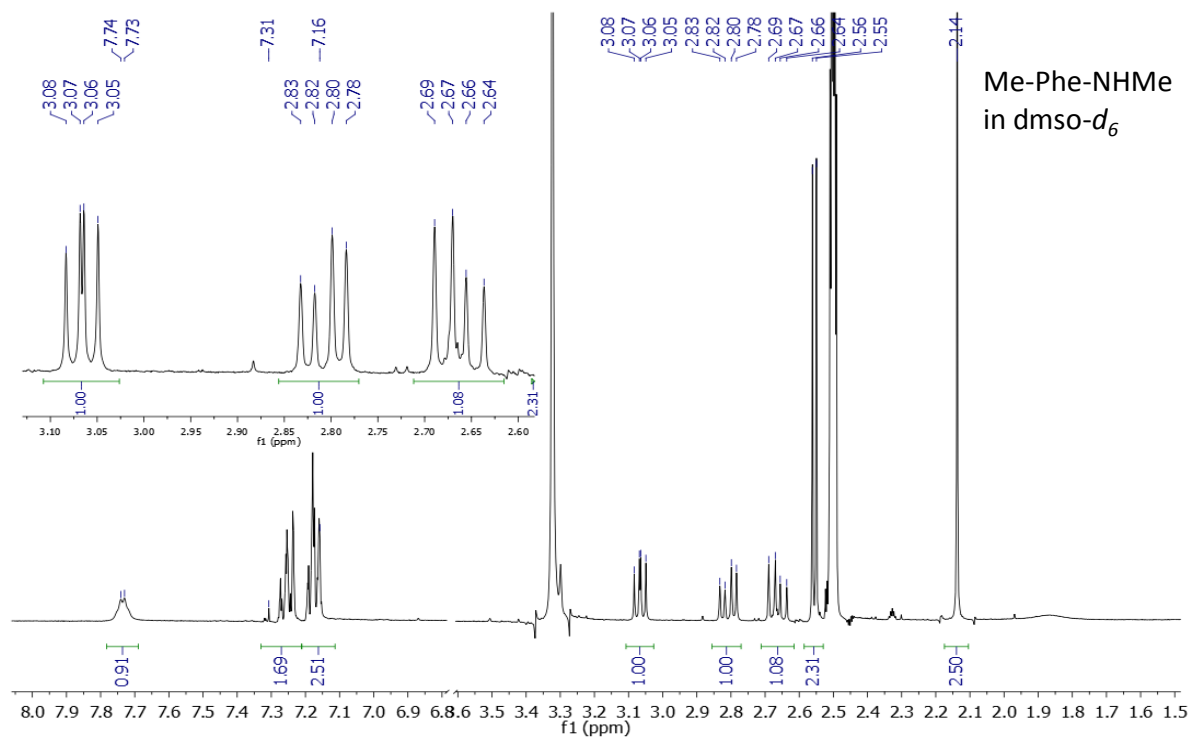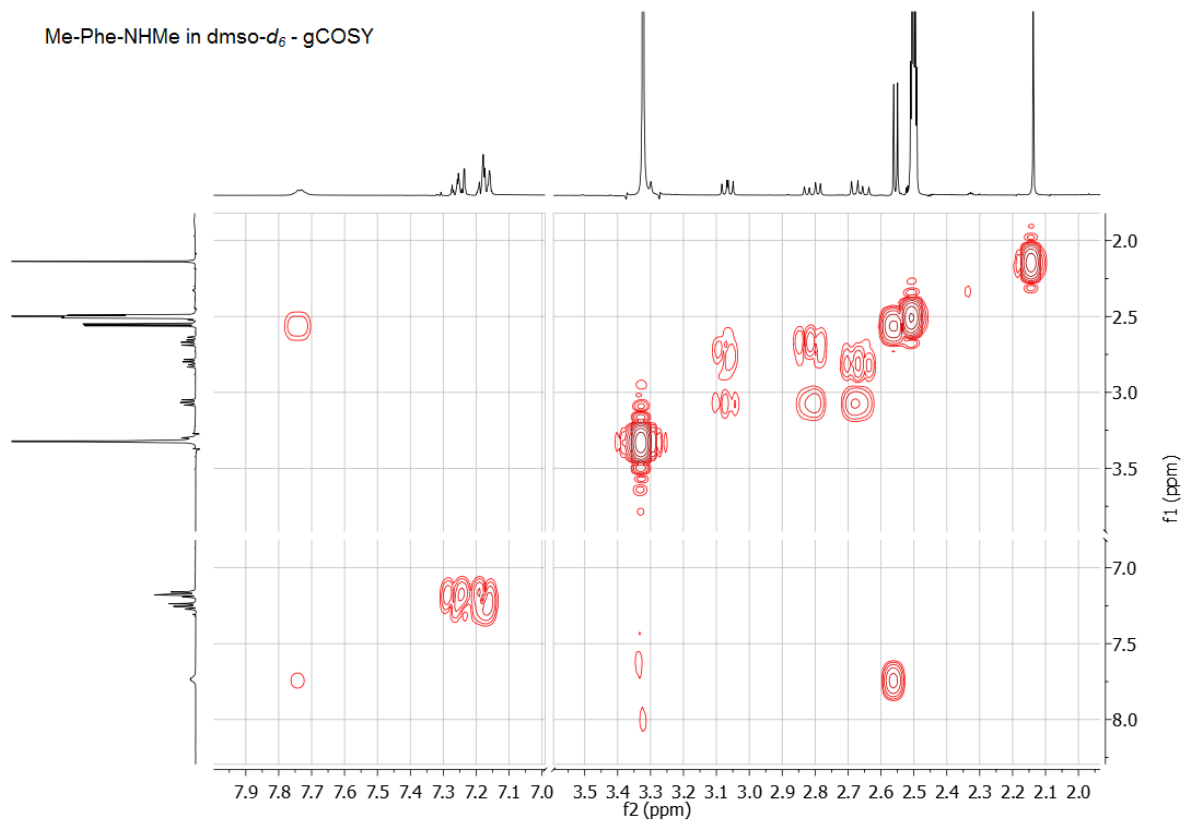

Me-Phe-NHMe in dms $o$ - $d_6$  - NOESY

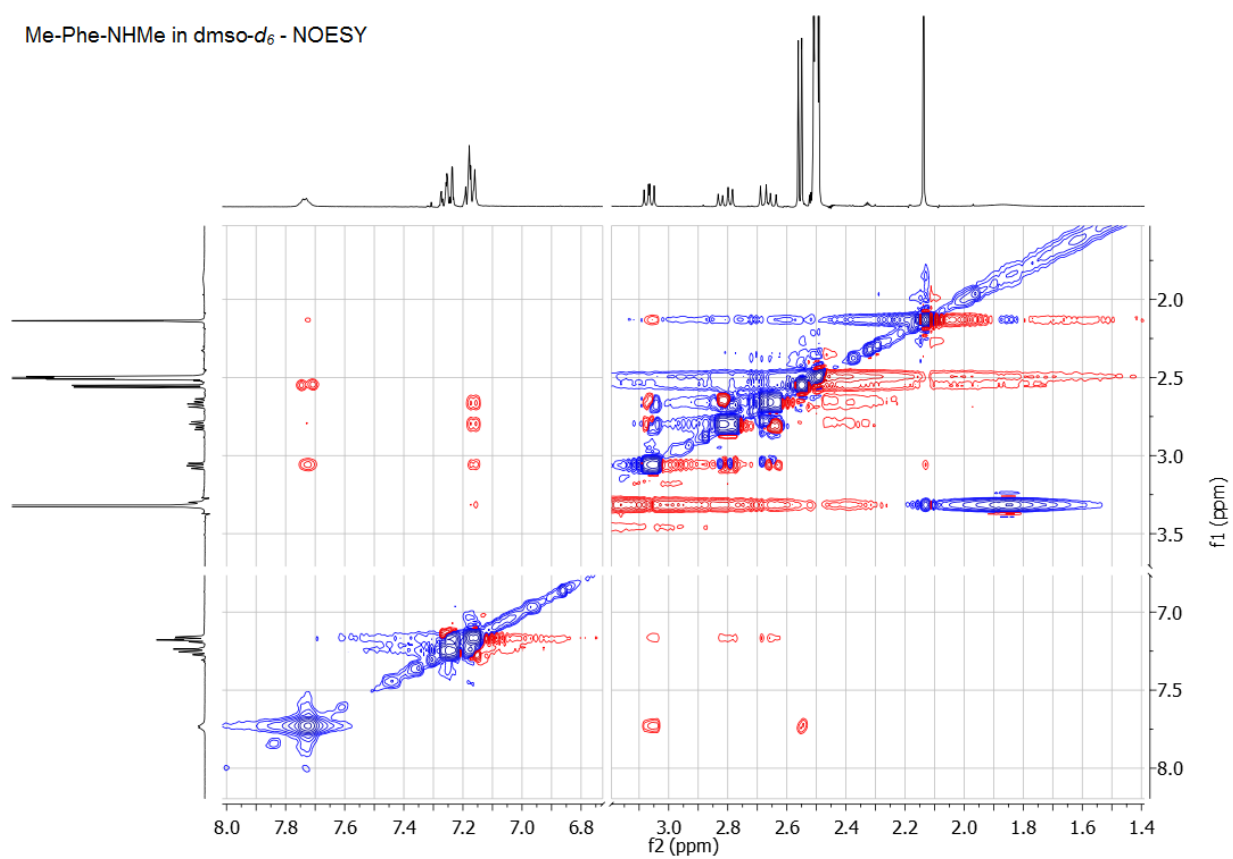

$^1\text{H}$ , gCOSY, gNOESY and  $^{13}\text{C}$  NMR spectra of **3d** in  $\text{CDCl}_3$

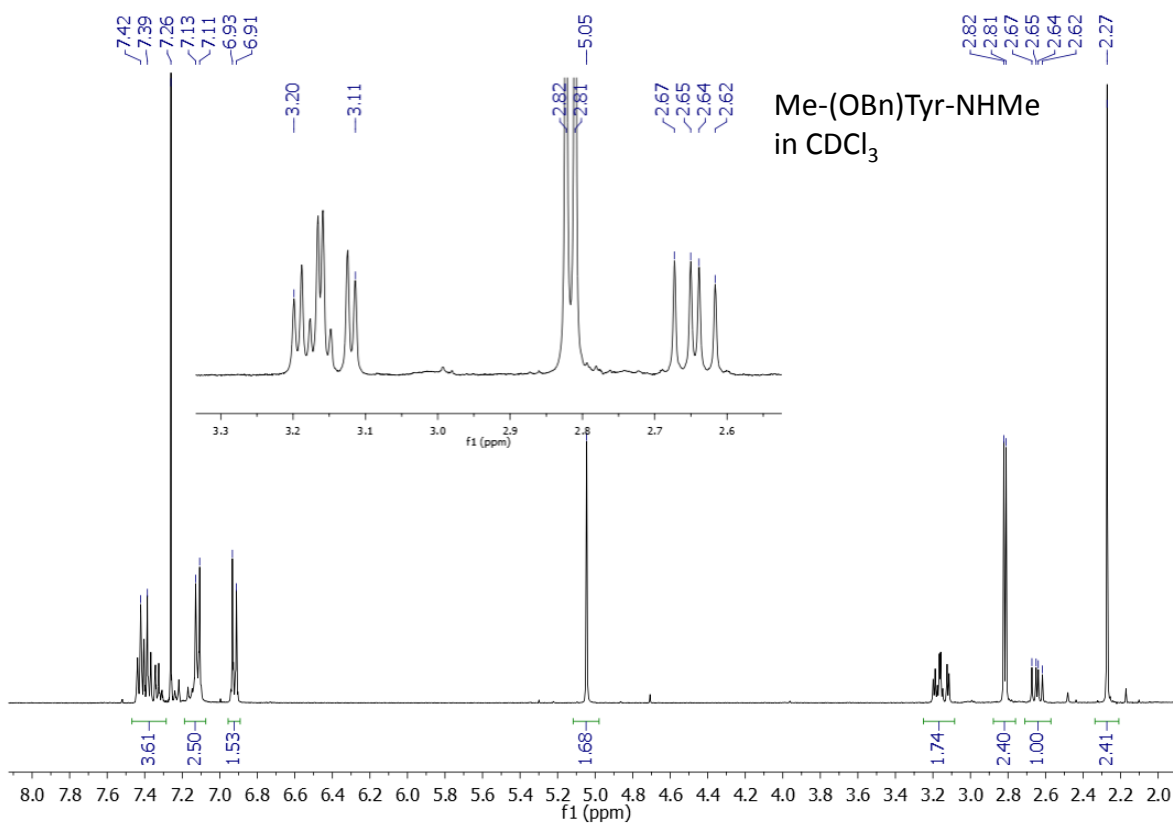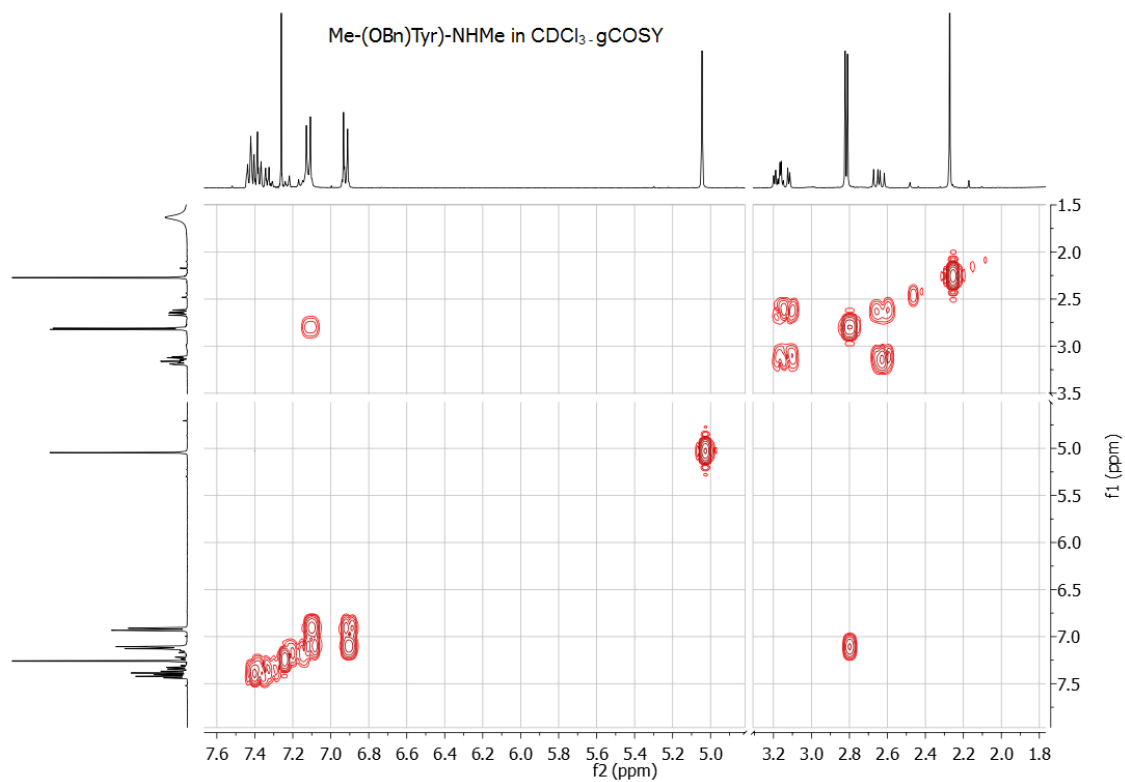

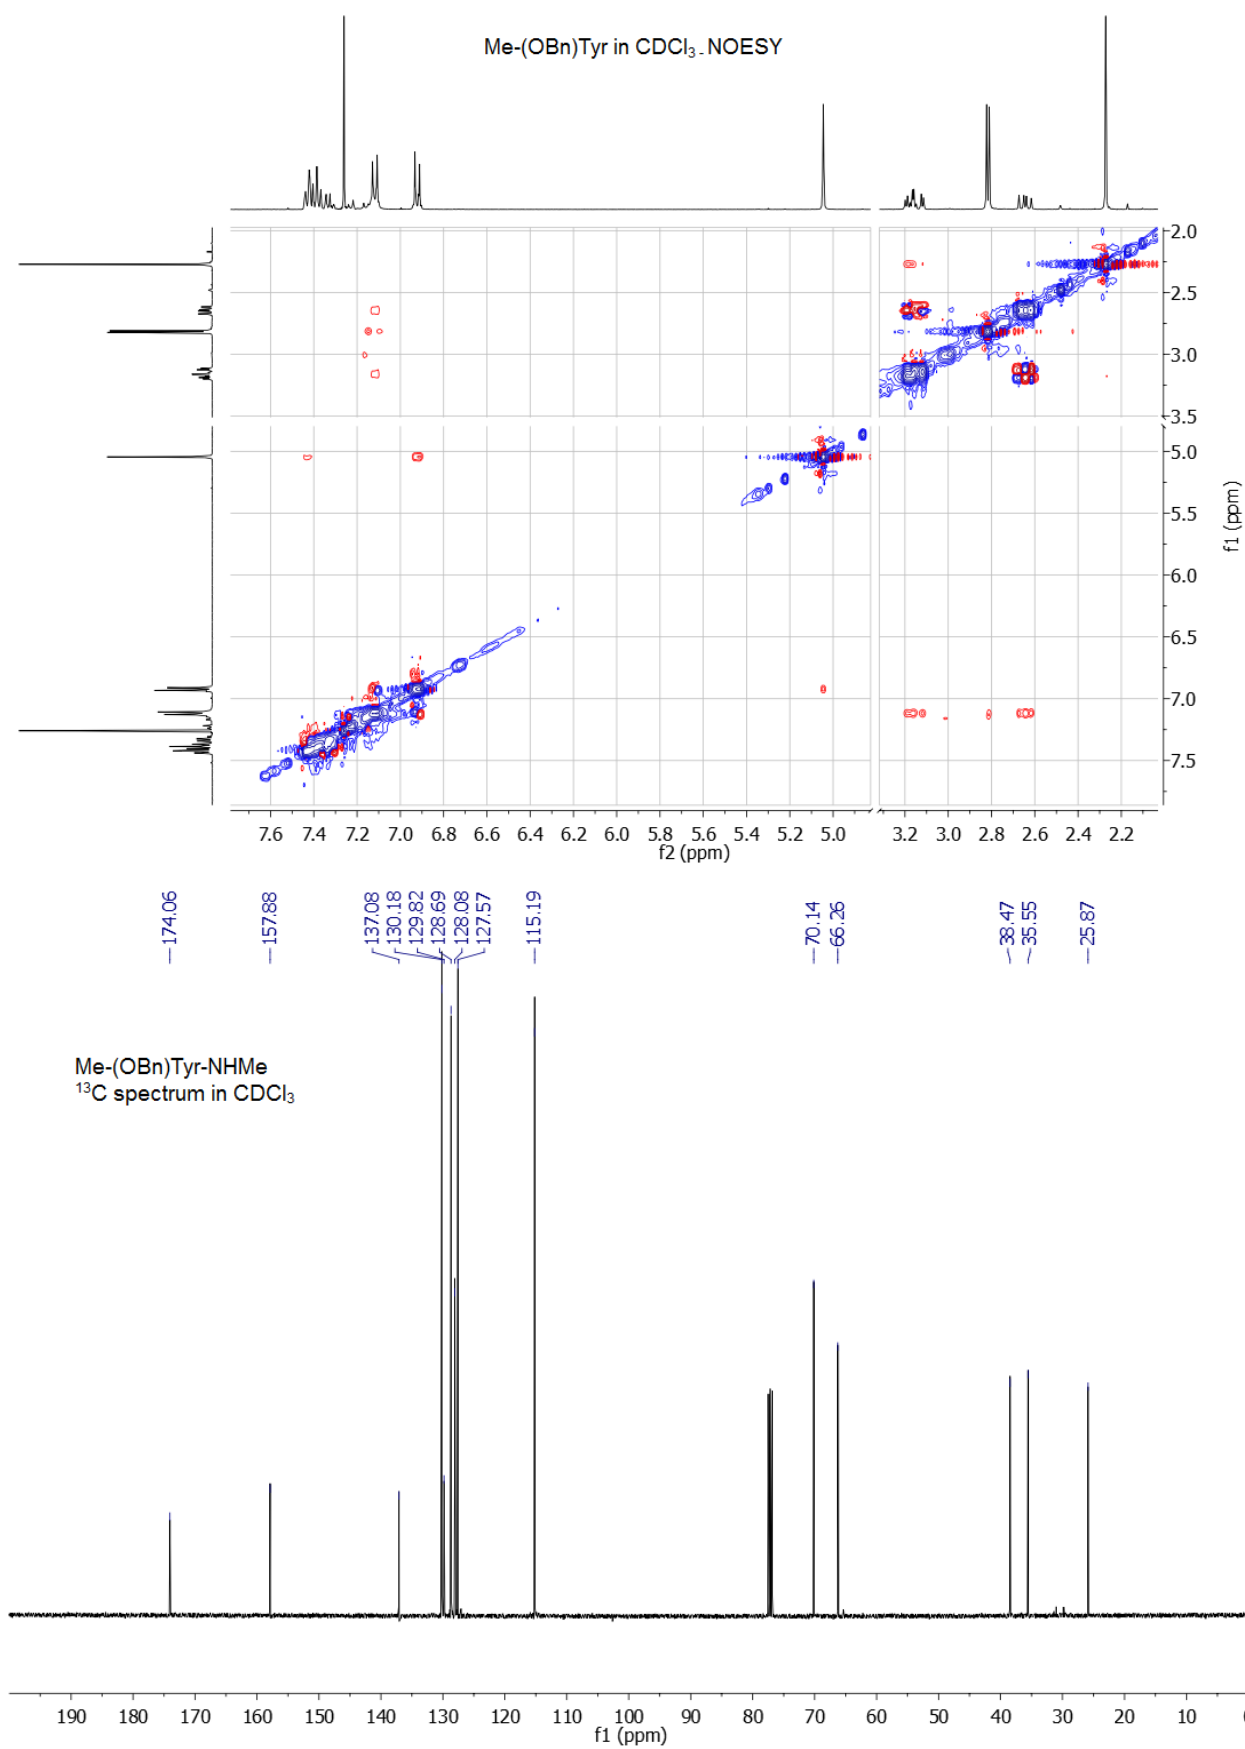

$^1\text{H}$ , gCOSY and gNOESY spectra of **3d** in  $\text{CD}_3\text{CN}$

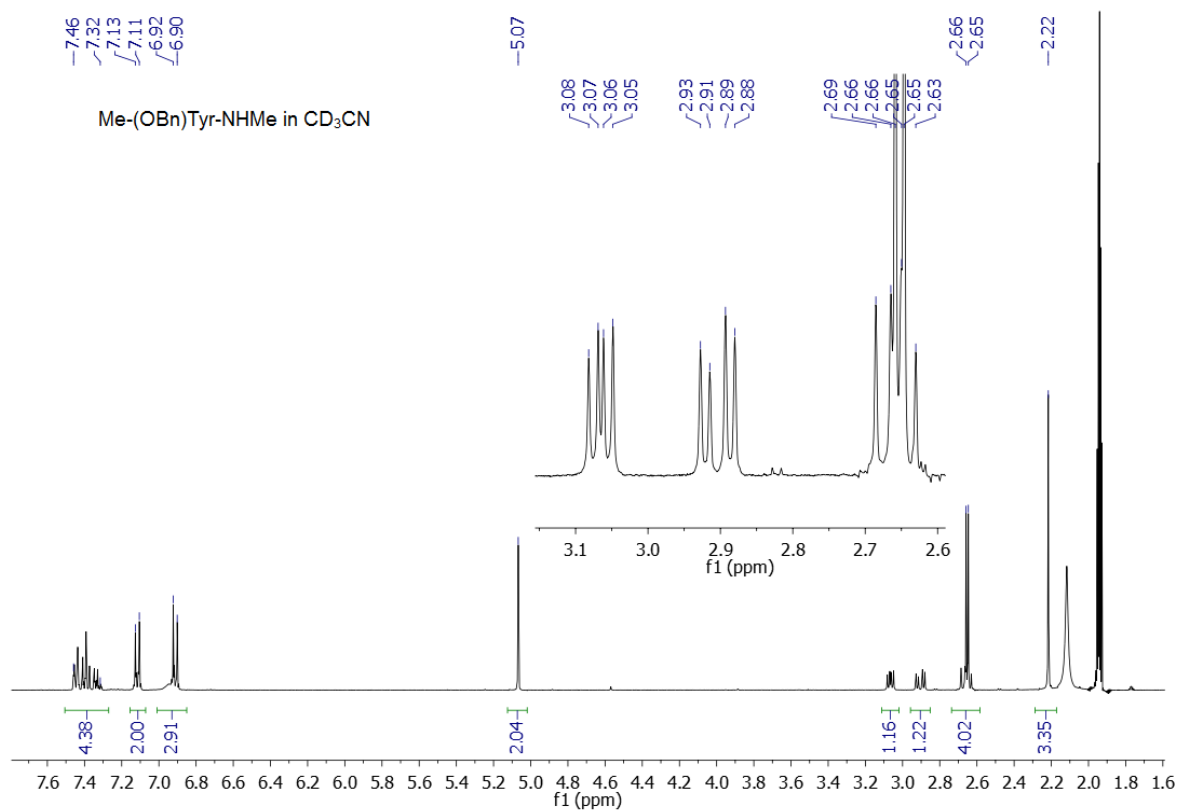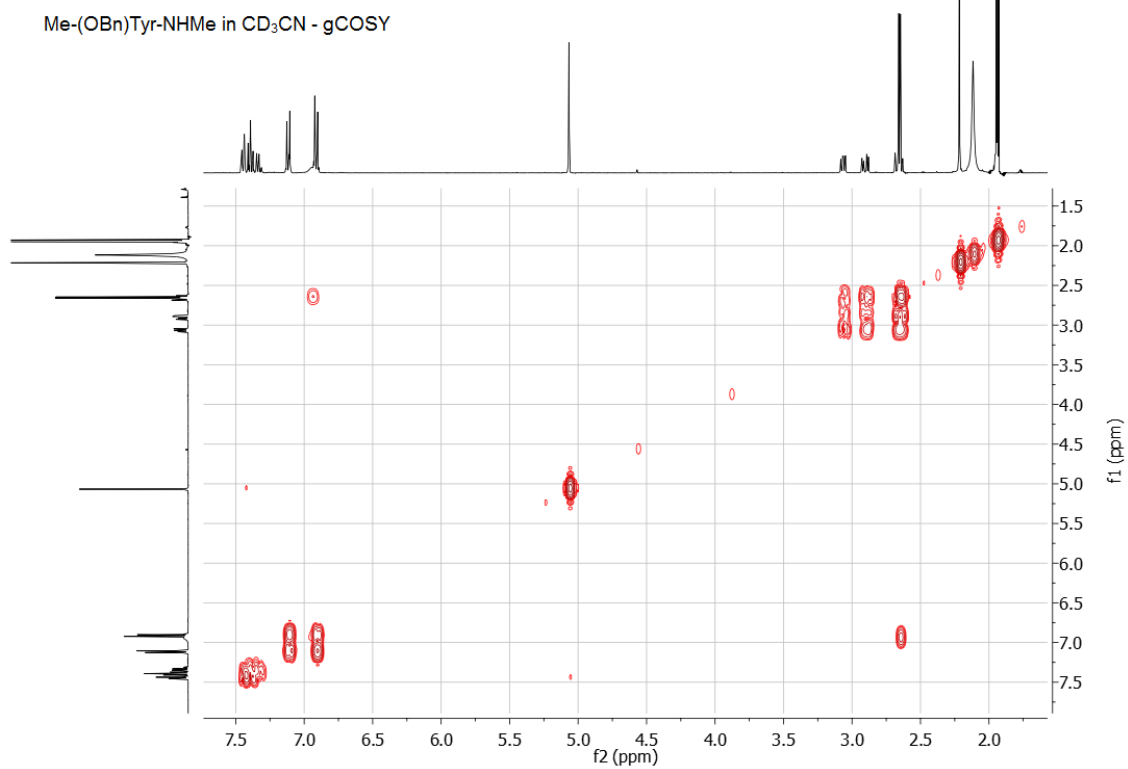



Me-(OBn)Tyr-NHMe in CD<sub>3</sub>CN - NOESY

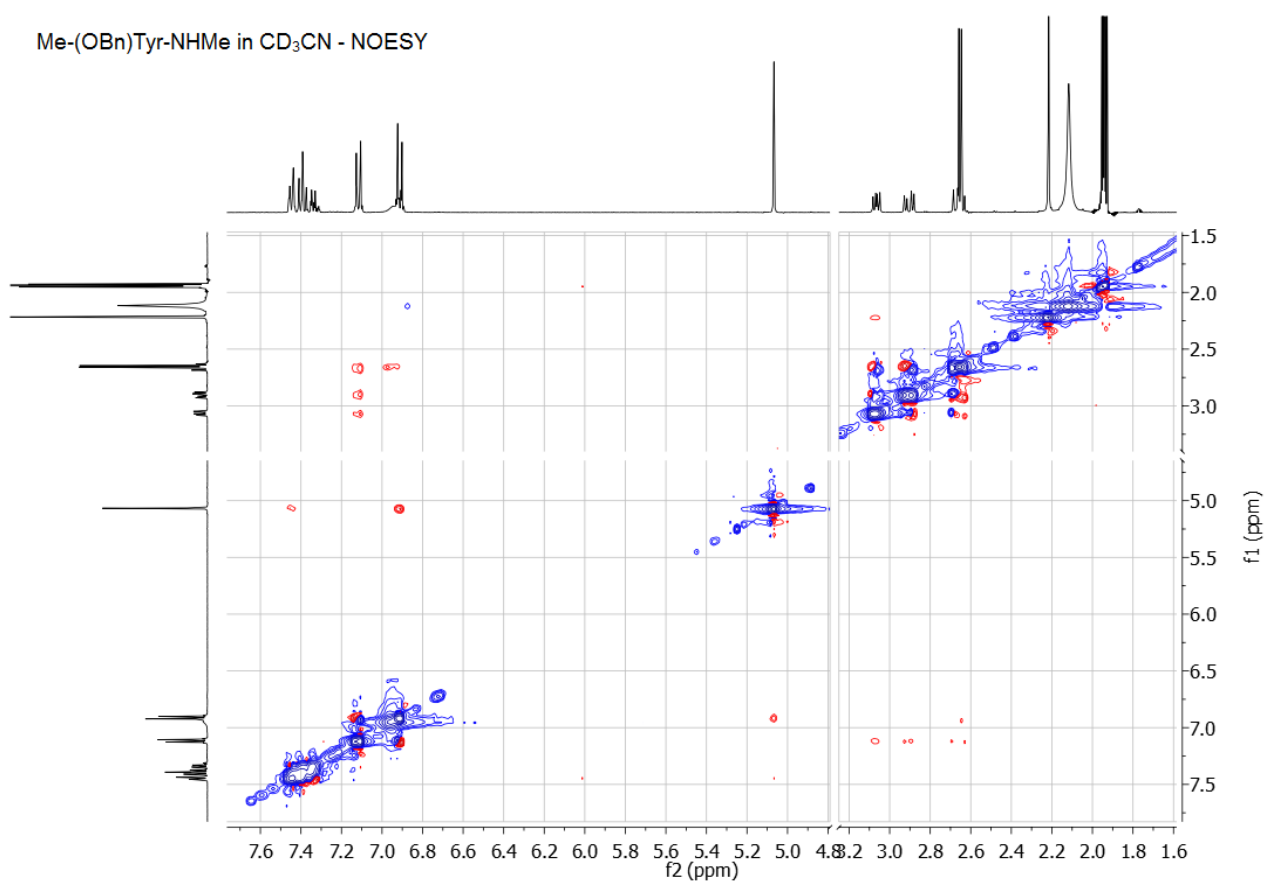

$^1\text{H}$ , gCOSY and gNOESY spectra of **3d** in  $\text{dms}\text{-}d_6$

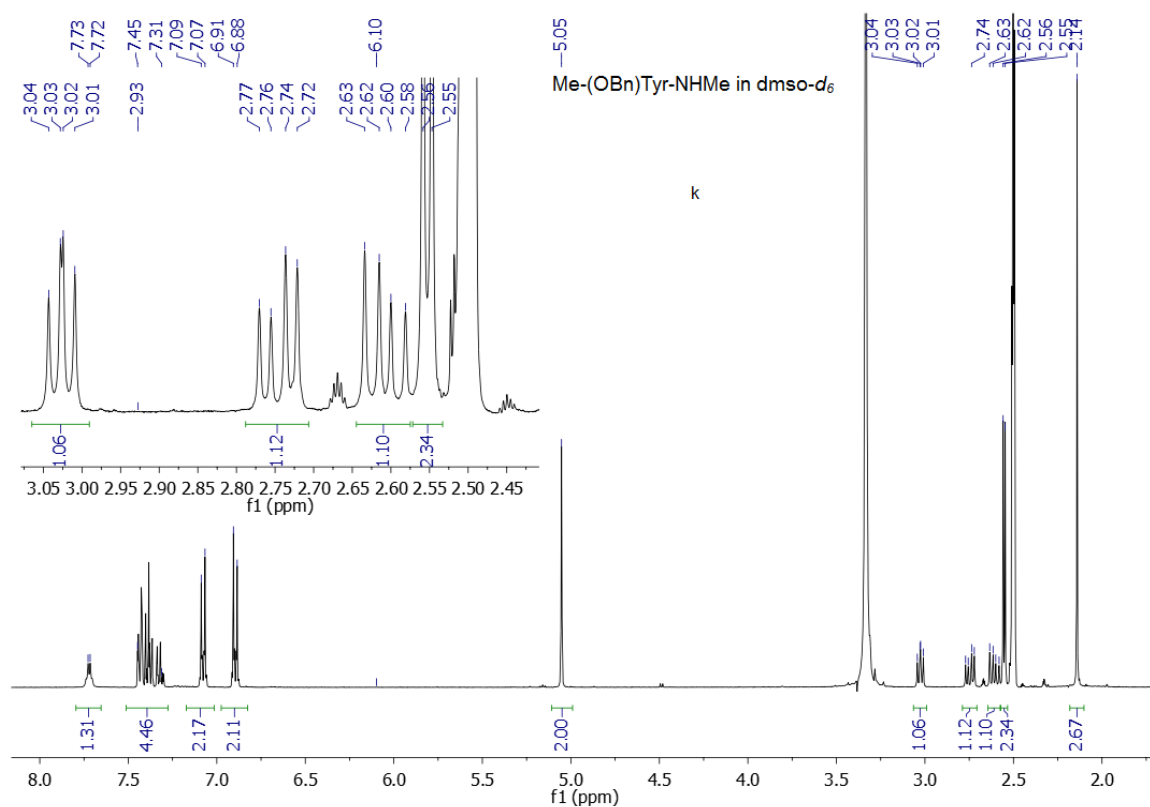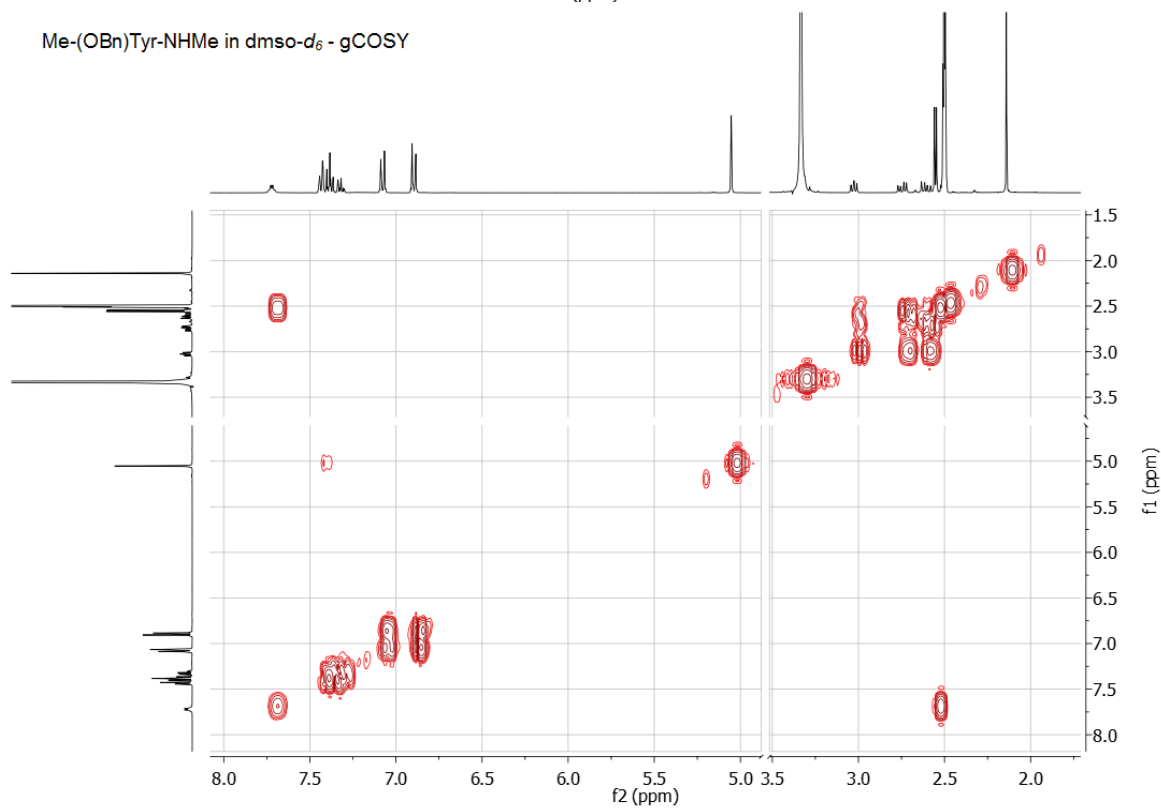

Me-(OBn)Tyr-NHMe in dms $o$ - $d_6$  - NOESY

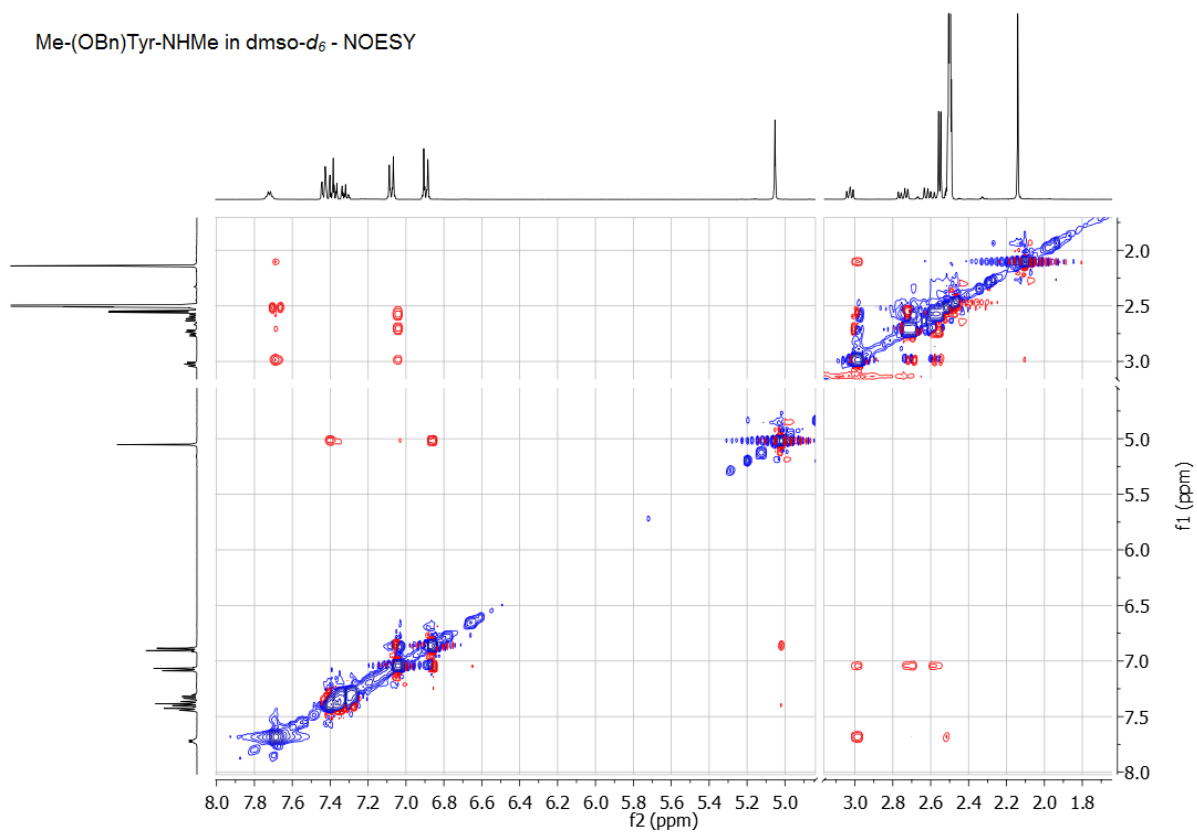

$^1\text{H}$ , gCOSY, gNOESY and  $^{13}\text{C}$  NMR spectra of **3e** in  $\text{CDCl}_3$

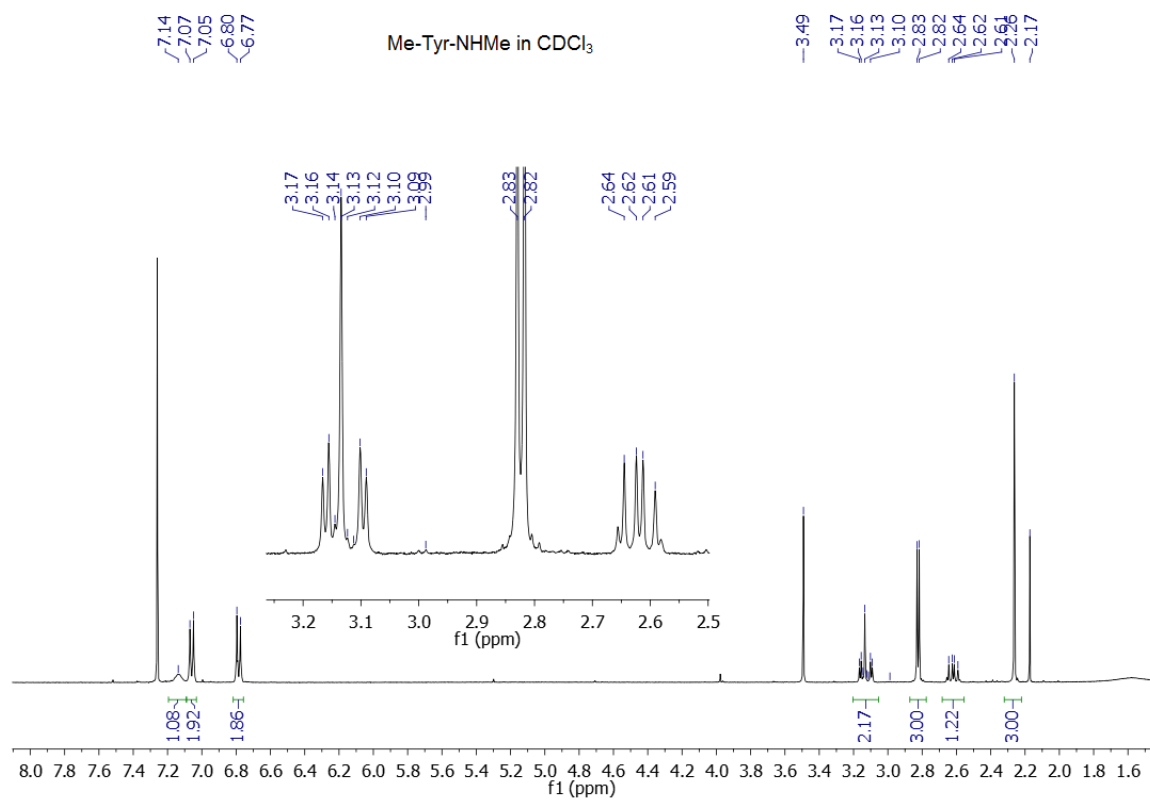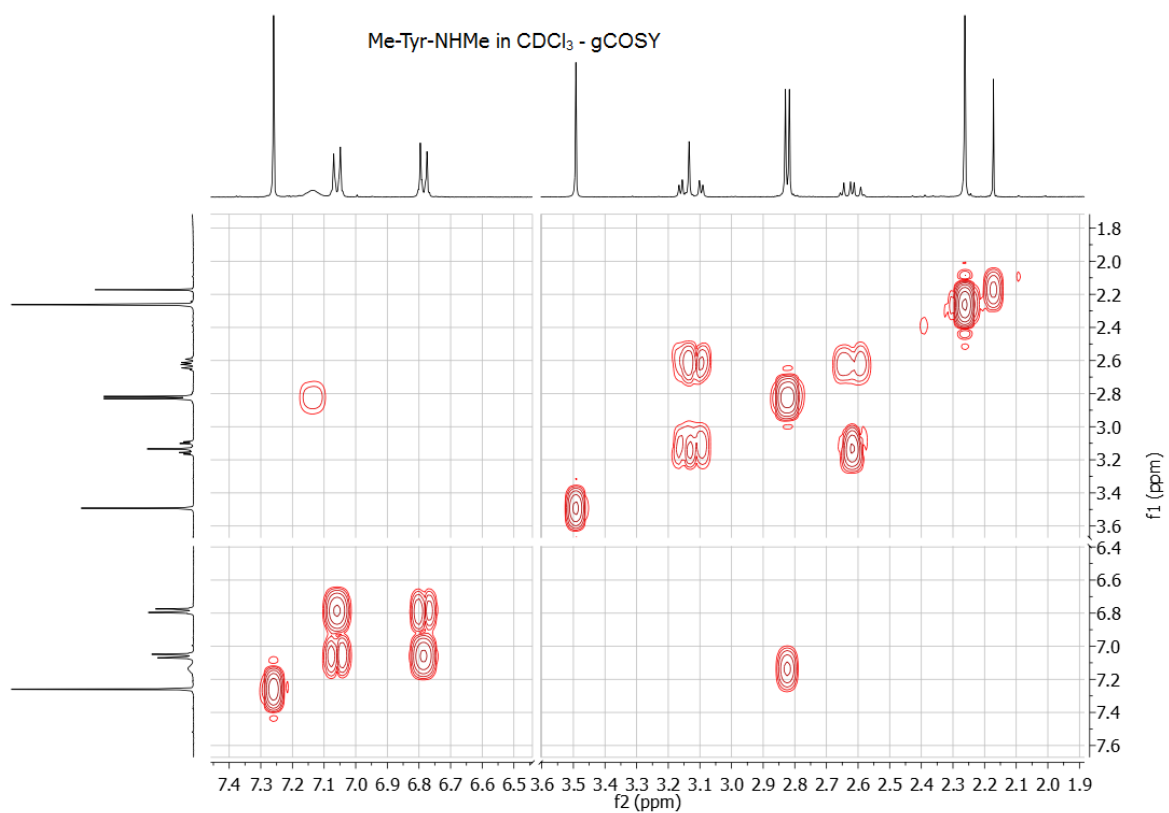

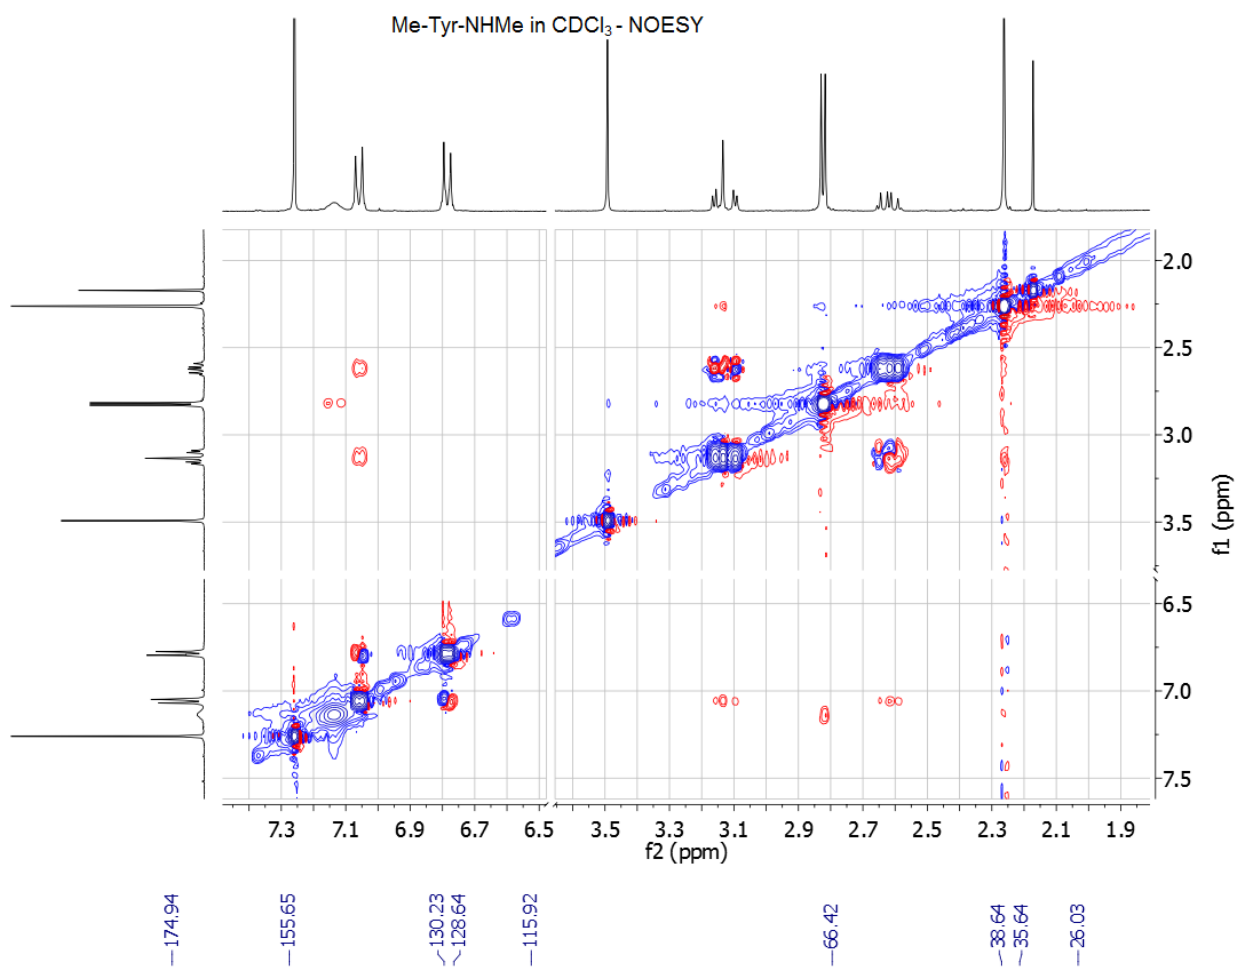

Me-Tyr-NHMe  
<sup>13</sup>C spectrum in CDCl<sub>3</sub>

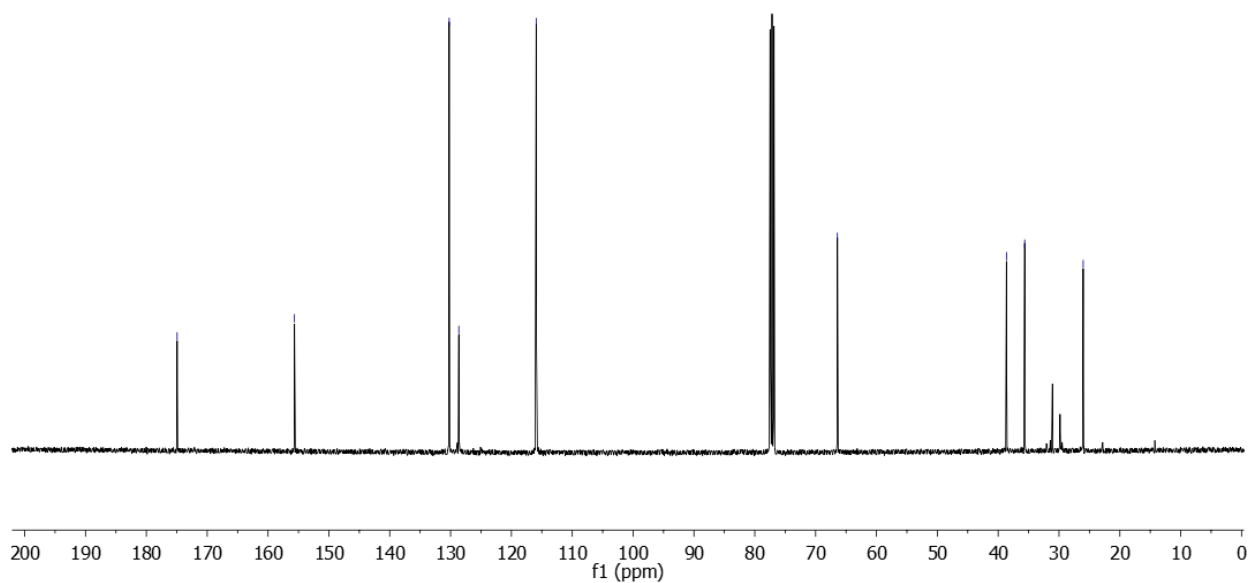

$^1\text{H}$ , gCOSY and gNOESY NMR spectra of **3e** in  $\text{CD}_3\text{CN}$

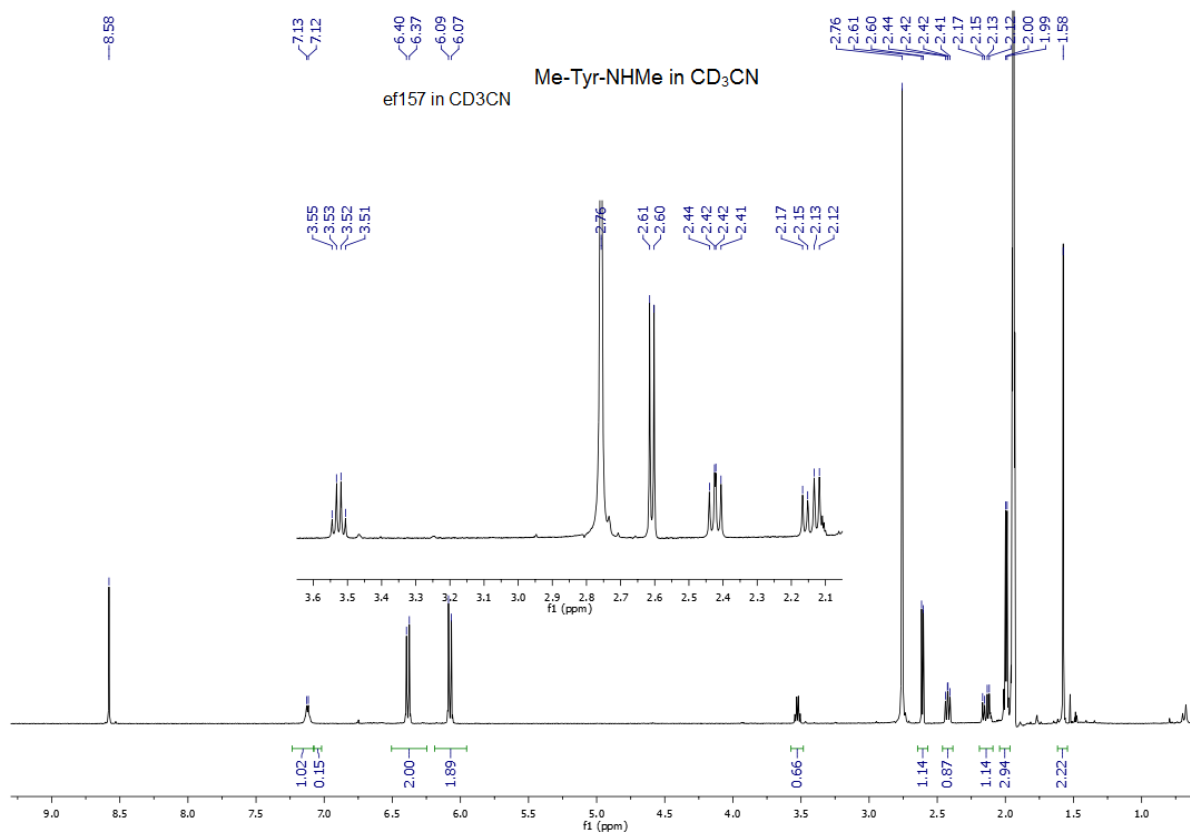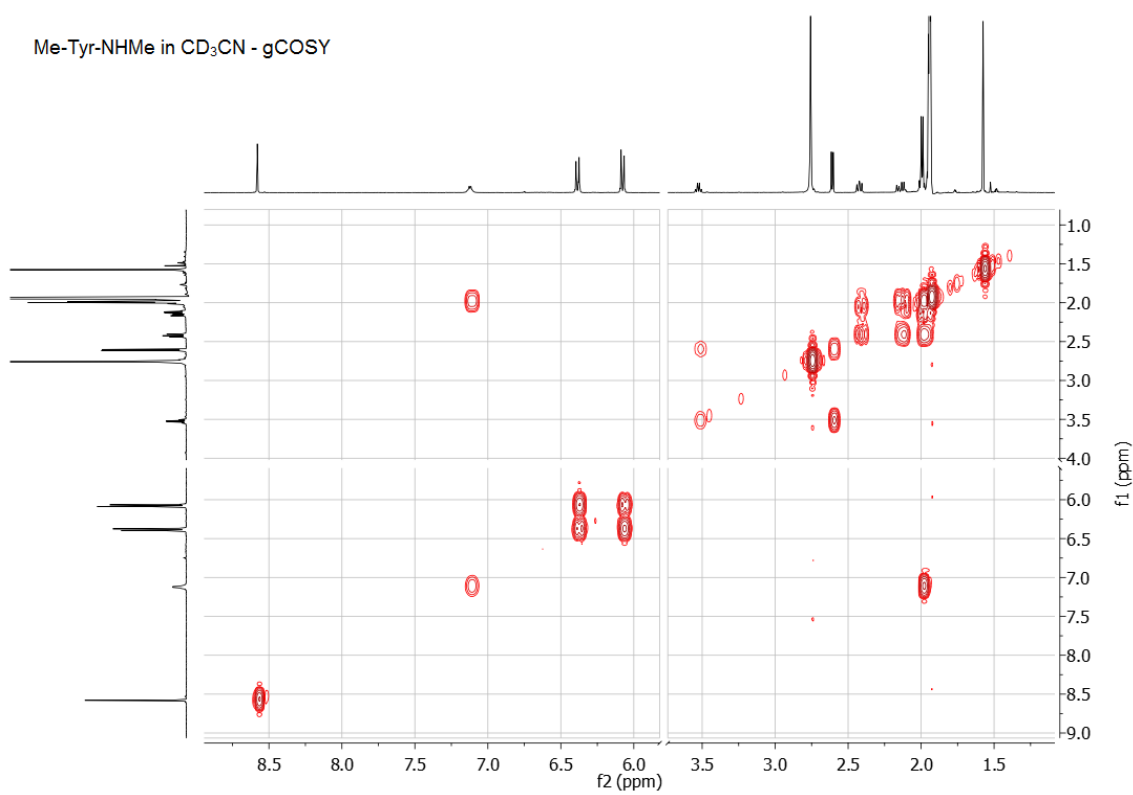

Me-Tyr-NHMe in CD<sub>3</sub>CN - NOESY

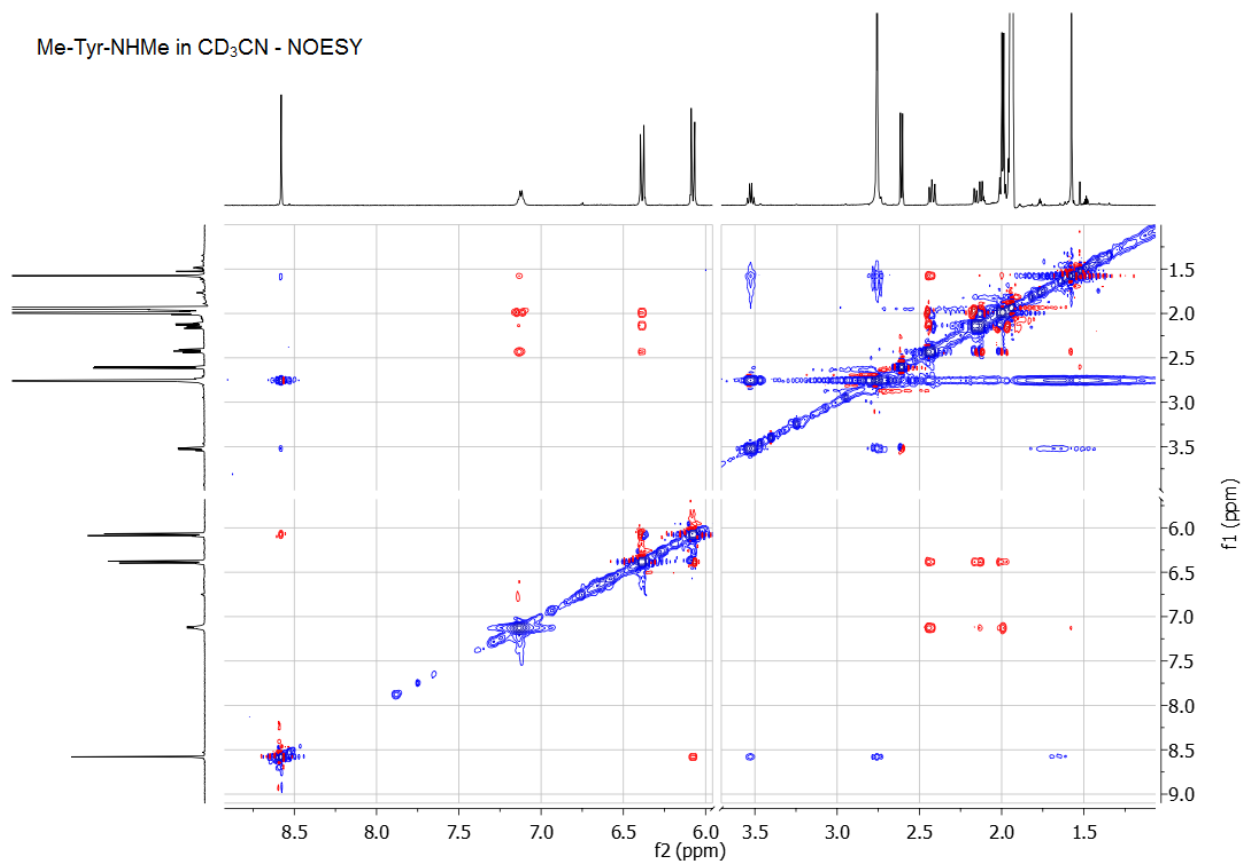

$^1\text{H}$ , gCOSY and gNOESY NMR spectra of **3e** in  $\text{dms}\text{-}d_6$

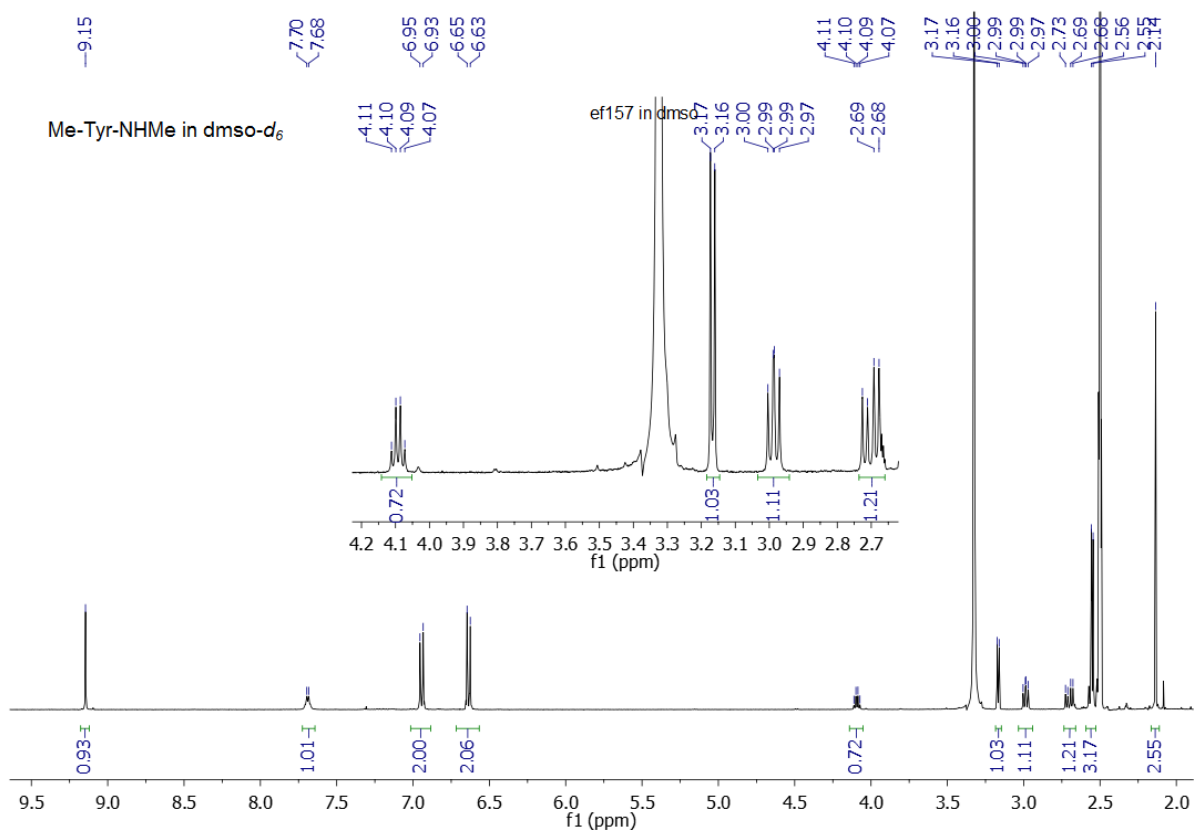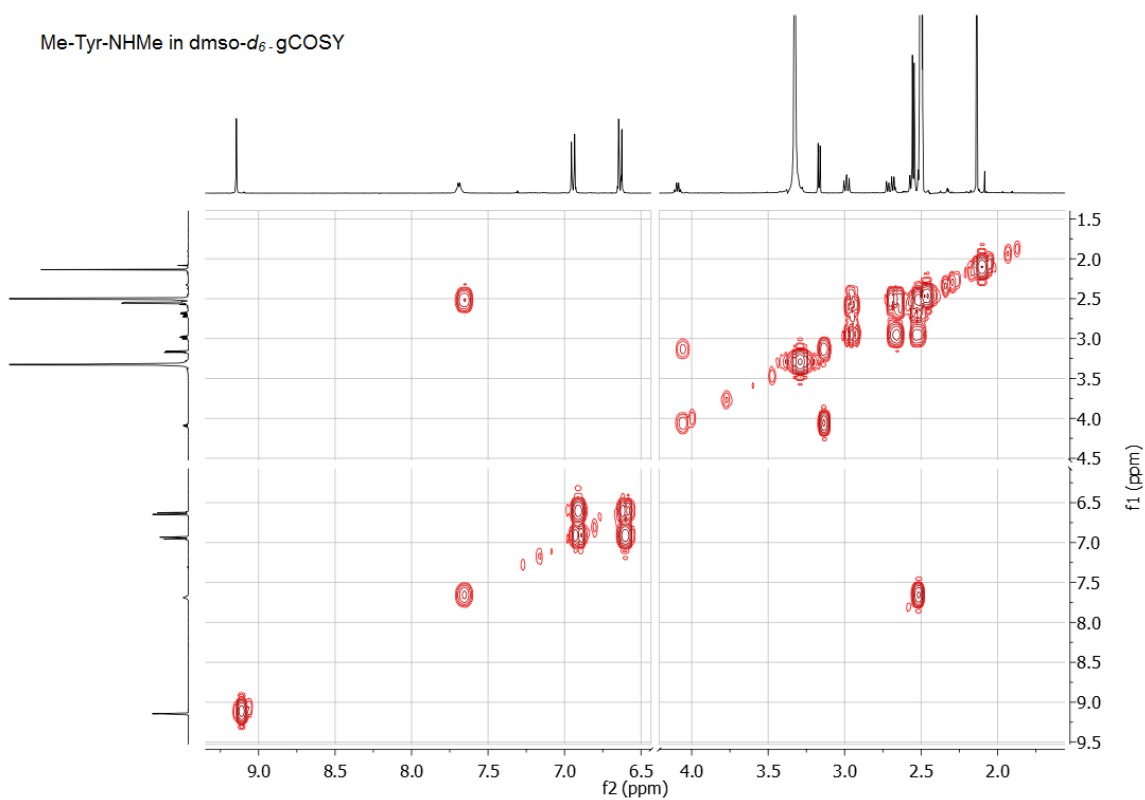



Me-Tyr-NHMe in  $\text{dms-}d_6$ -NOESY

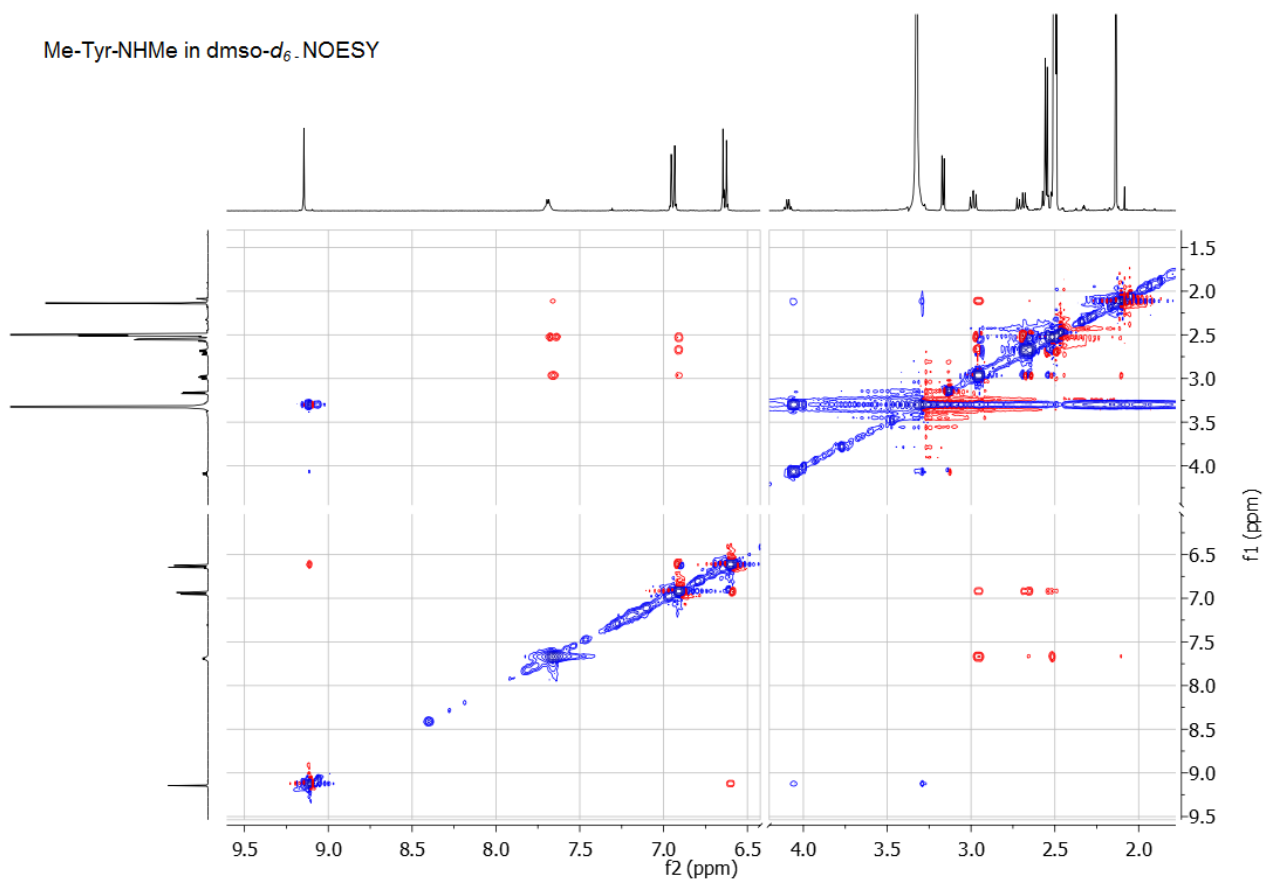

$^1\text{H-NMR}$  spectra of **3a** in  $\text{CDCl}_3$  at different concentrations

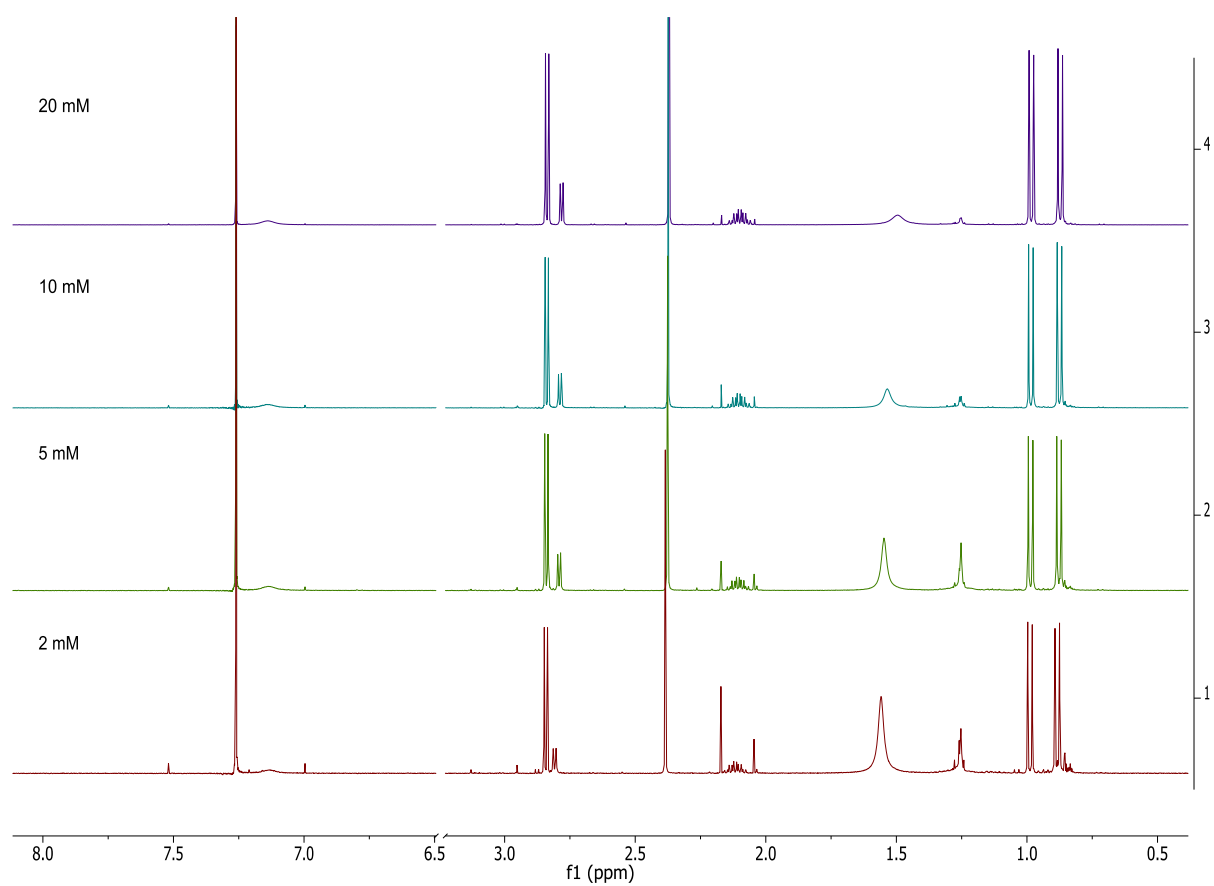

Chemical shift of the amide NH signal (in ppm) of **3a** in a  $\text{CDCl}_3/\text{dms-}d_6$  mixture as a function of the percentage of  $\text{dms-}d_6$ .

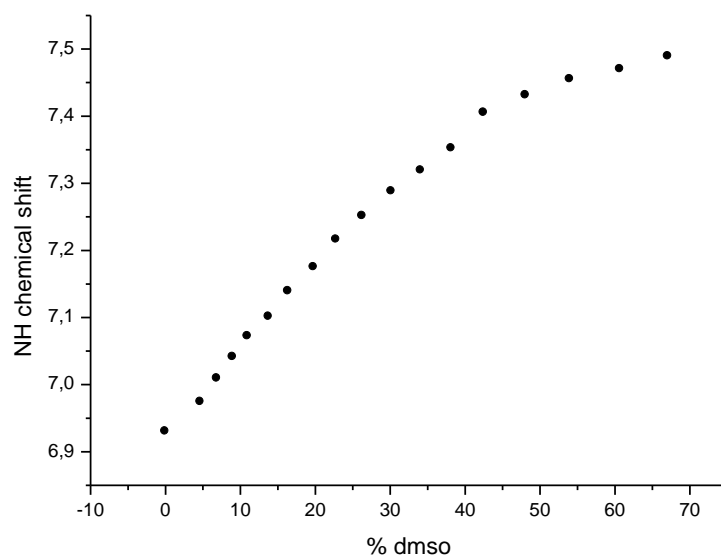

$^1\text{H-NMR}$  (500 MHz) spectra of **3a** with increasing amounts of  $\text{dms-}d_6$  in  $\text{CDCl}_3$  (bottom: 0%  $\text{dms-}d_6$ , top: 67.1%  $\text{dms-}d_6$ ).

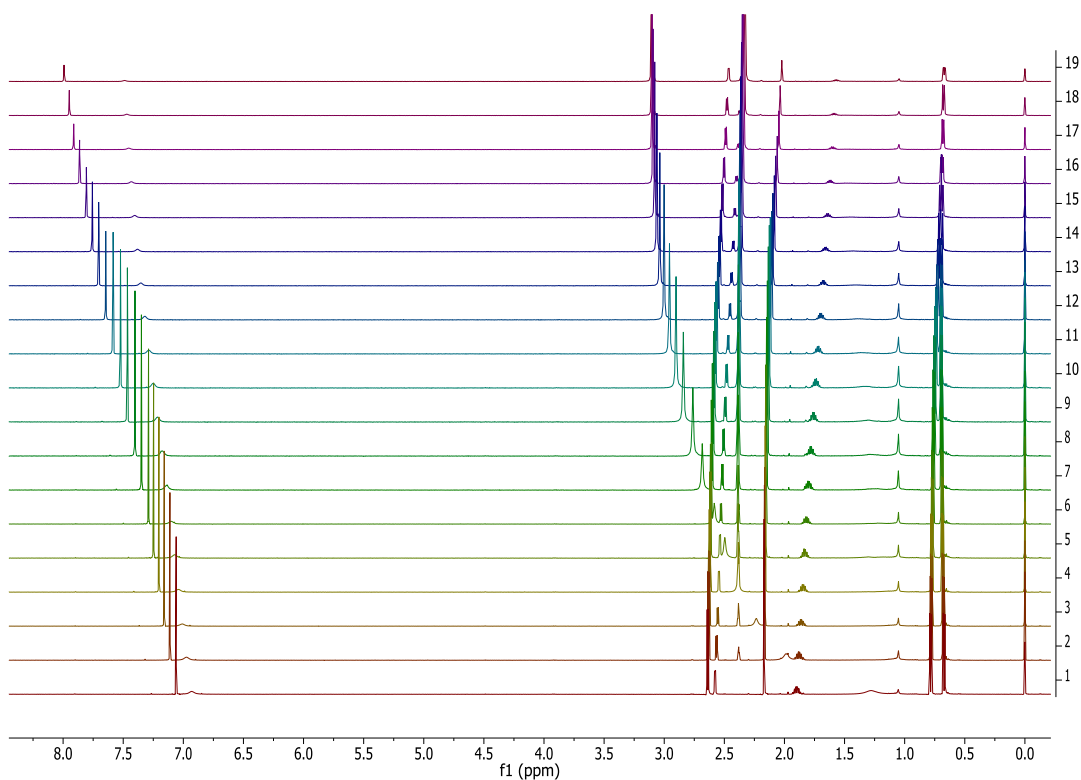

Amide NH region of the  $^1\text{H-NMR}$  (500 MHz) spectra of **3a** with increasing amounts of  $\text{dms}\text{-}d_6$  in  $\text{CDCl}_3$  (bottom: 0%  $\text{dms}\text{-}d_6$ , top: 67.1%  $\text{dms}\text{-}d_6$ ).

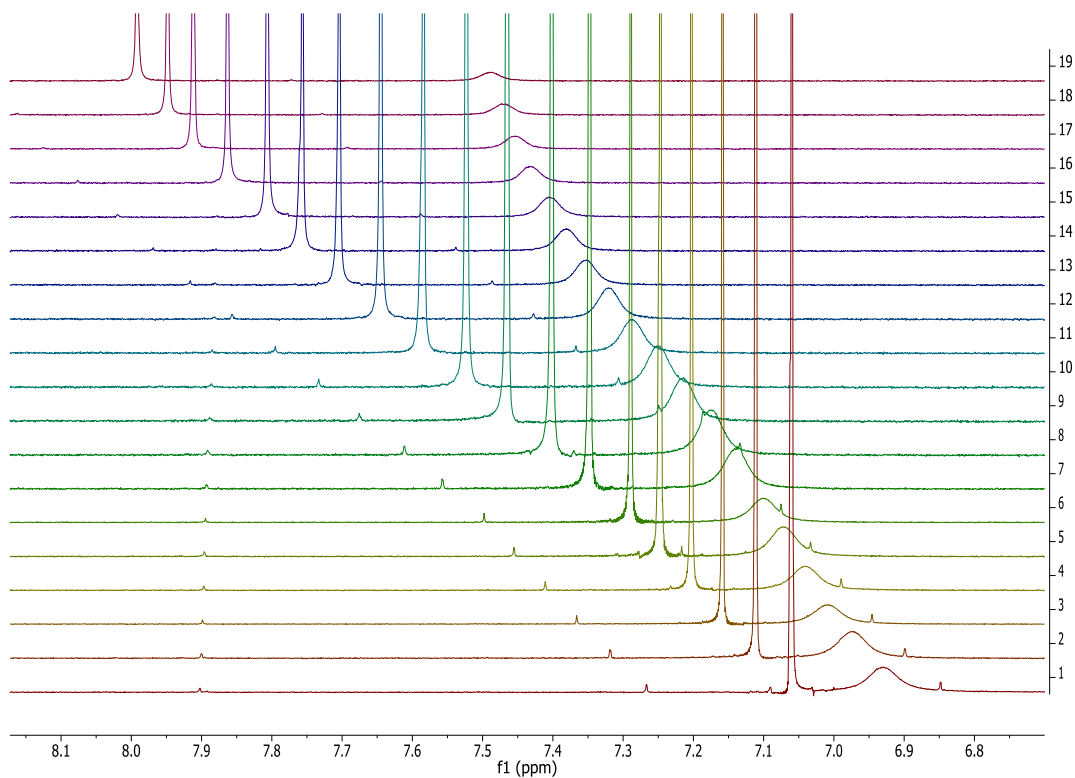

Chemical shift of the amide NH signal (in ppm) of **3c** in a  $\text{CDCl}_3/\text{dms}\text{-}d_6$  mixture as a function of the percentage of  $\text{dms}\text{-}d_6$ .

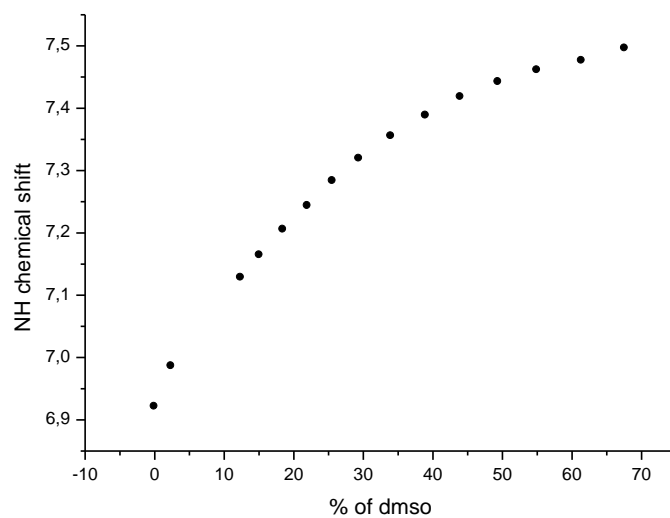

$^1\text{H-NMR}$  (500 MHz) spectra of **3c** with increasing amounts of  $\text{dms}\text{-}d_6$  in  $\text{CDCl}_3$  (bottom: 0%  $\text{dms}\text{-}d_6$ , top: 67.1%  $\text{dms}\text{-}d_6$ ).

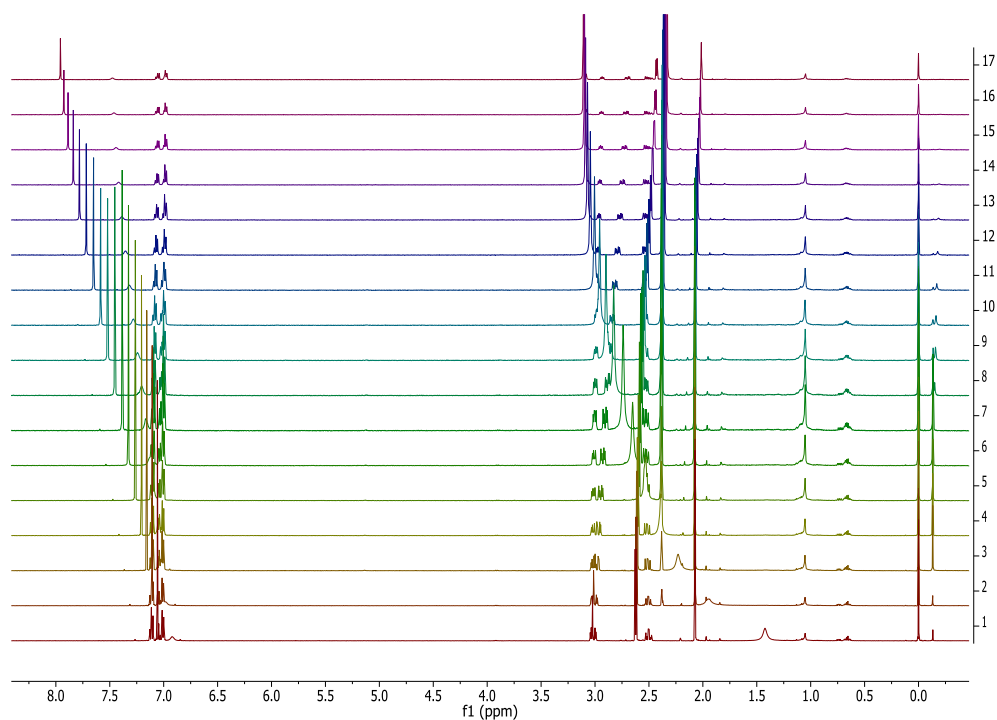

Amide NH region of the  $^1\text{H-NMR}$  spectra of **3c** with increasing amounts of  $\text{dms}\text{-}d_6$  in  $\text{CDCl}_3$  (bottom: 0%  $\text{dms}\text{-}d_6$ , top: 61.4%  $\text{dms}\text{-}d_6$ ).

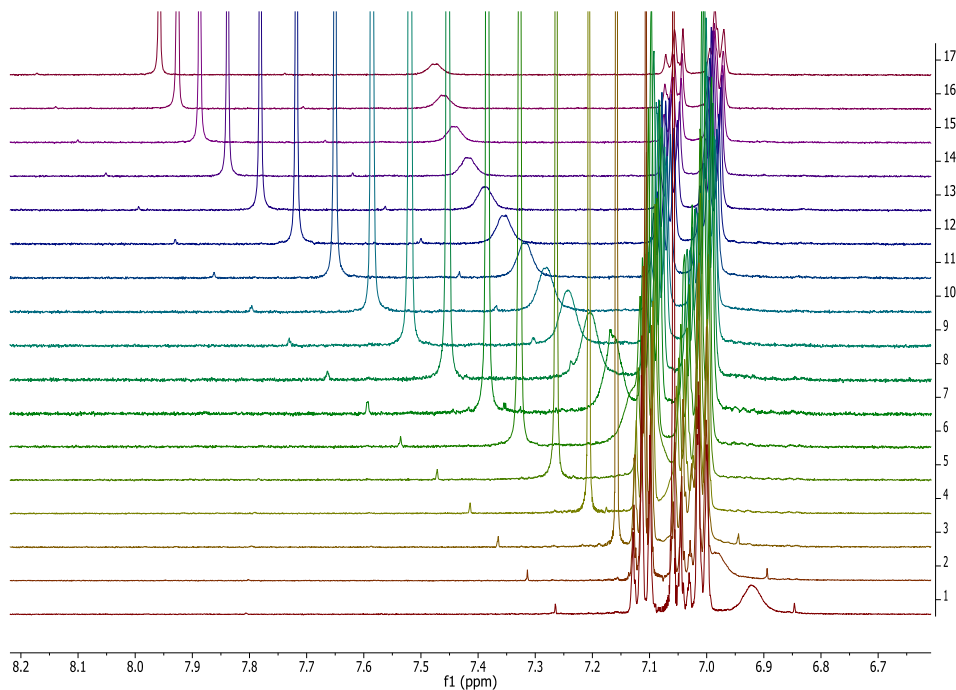

Comparison of the amide NH chemical shift (in ppm) of **3c** (o) and **3a** (•) as a function of the percentage of dms $o$ - $d_6$  in CDCl $_3$ .

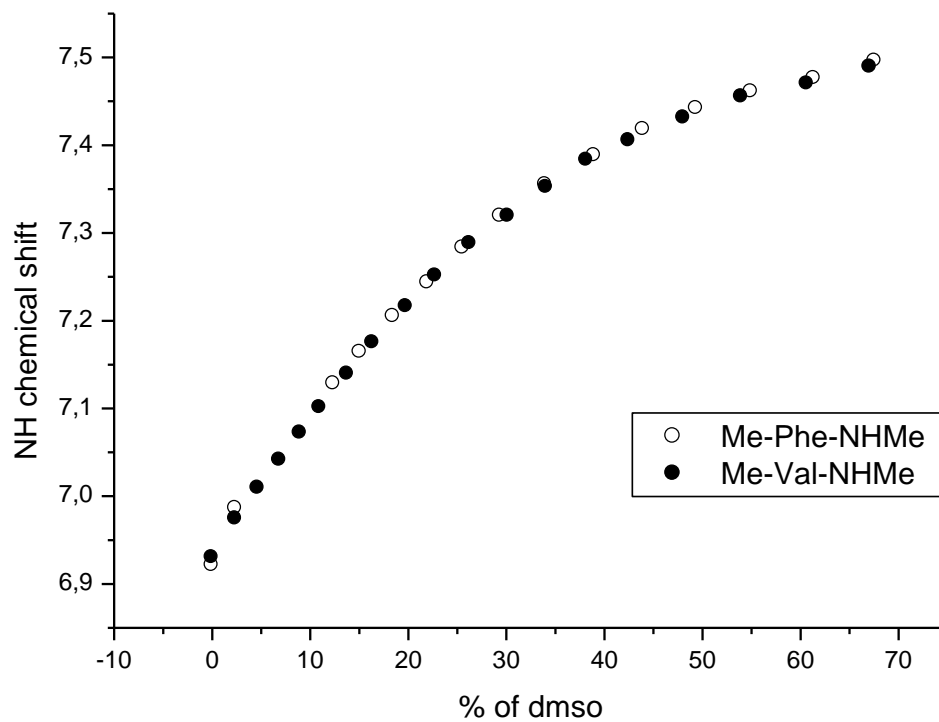

Amide NH region of the  $^1\text{H-NMR}$  (500 MHz) spectra of **3a** at different temperatures; from 45°C (top) to 10°C (bottom).

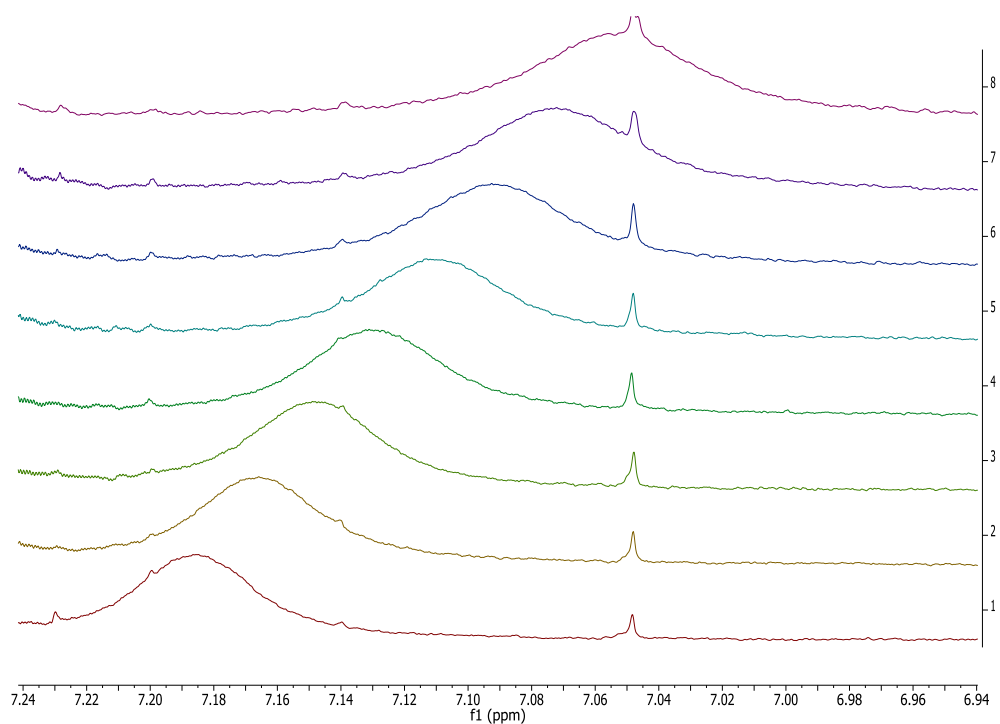

Chemical shift of the amide NH of **3a** as a function of temperature. Experimental points (black circles) and linear fitting (red line). The fitting provides a value of  $\Delta\delta = -3.74$  ppb/°C

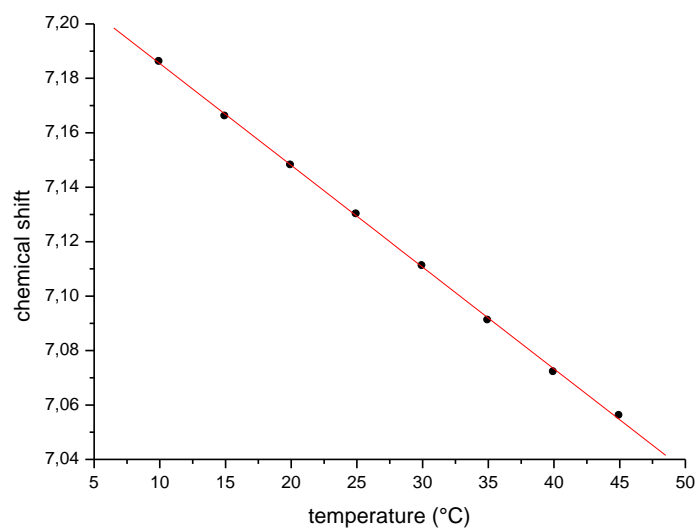

Amide NH region of the  $^1\text{H-NMR}$  (500 MHz) spectra of **3c** at different temperatures; from 45°C (top) to 10°C (bottom).

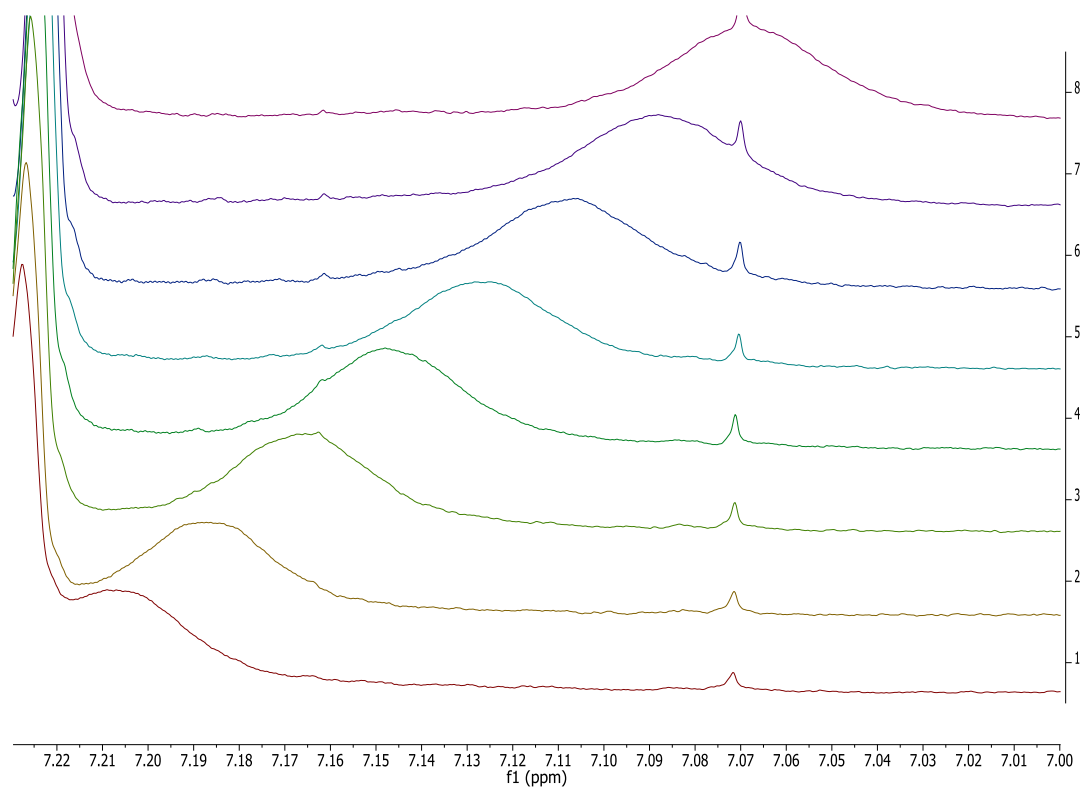

Chemical shift of the amide NH of **3c** as a function of temperature. Experimental points (black circles) and linear fitting (red line). The fitting provides a value of  $\Delta\delta = -3.93 \text{ ppb}/^\circ\text{C}$

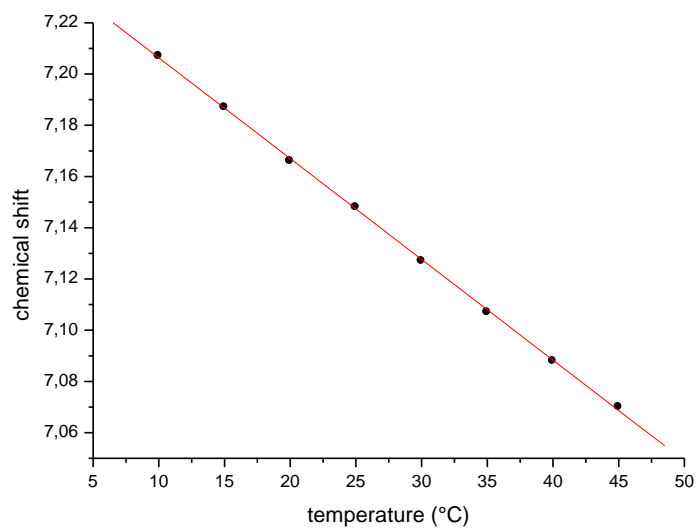



## ATR-IR Spectra

Attenuated total reflectance infrared (ATR-IR) spectra were recorded on a Bruker Vertex 70 spectrophotometer equipped with a Specac Golden Gate ATR accessory. The spectra were acquired either using bulk materials or by slow evaporation of the sample onto the ATR sample holder. To do that, 2-3 drops of a 20 mM solution of the sample in chloroform were placed on the ATR sample holder, and spectra were collected sequentially, approximately every 40 seconds, until complete solvent evaporation was achieved.

ATR-IR spectrm of **3a** (solid), maxima at: 3293, 2963, 1637, 1565  $\text{cm}^{-1}$ .

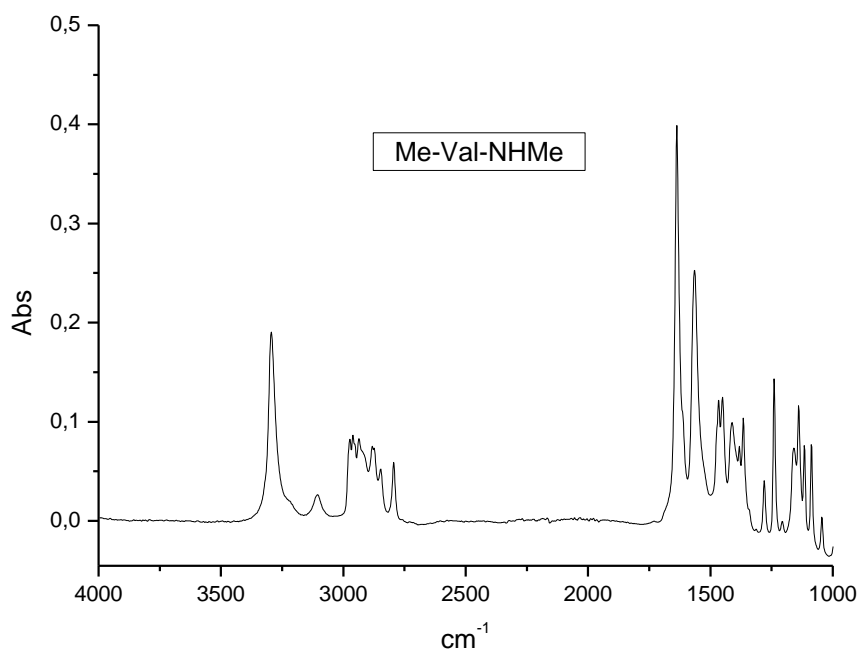

ATR-IR Spectra of **3b** (oil), maxima at 3295, 2954, 1647 and 1535  $\text{cm}^{-1}$ .

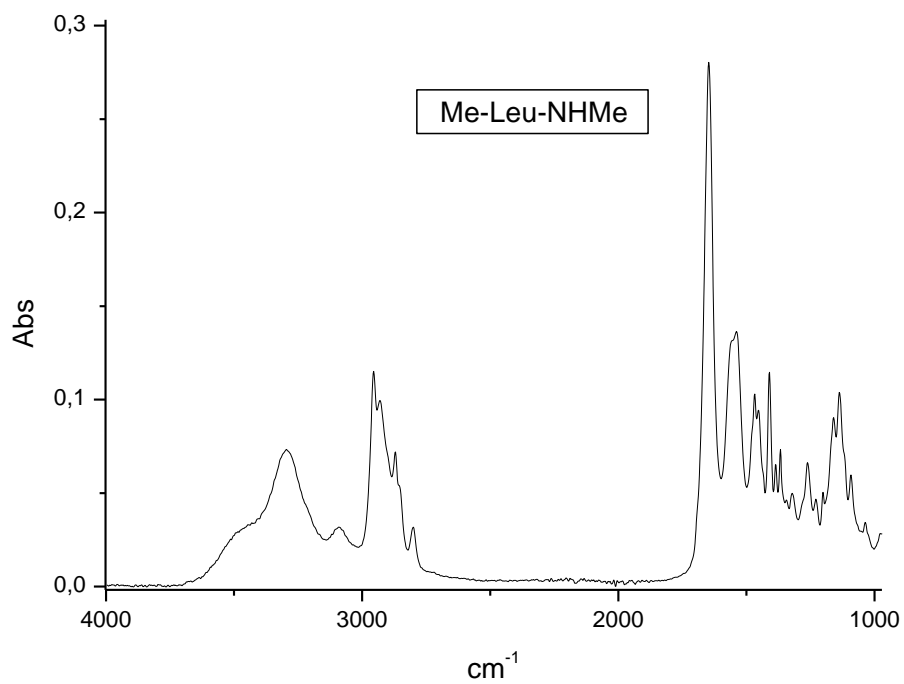

ATR-IR Spectra of **3c** (oil), maxima at 3300, 2935, 1648 and 1531  $\text{cm}^{-1}$ .

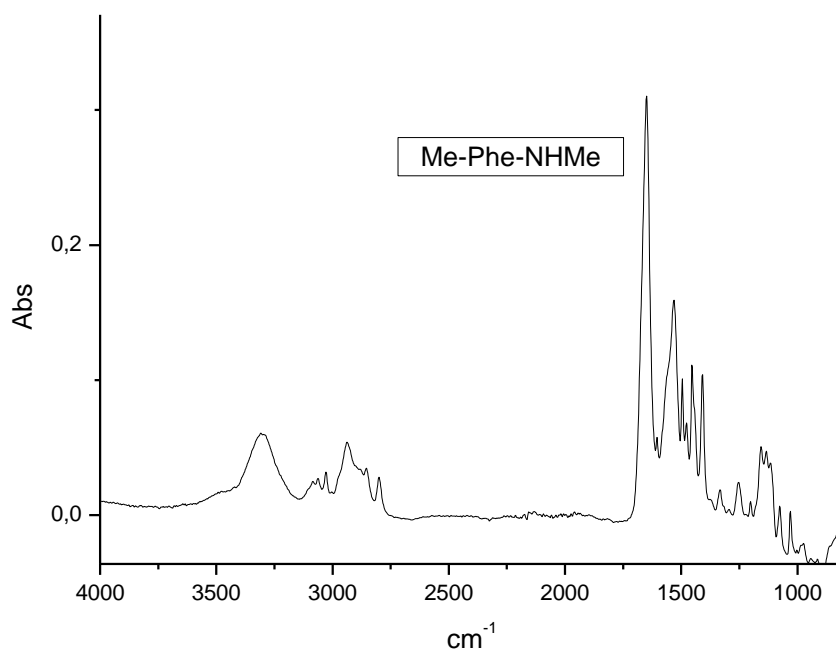

ATR-IR Spectra of **3d** (solid), maxima at 3314, 2914, 1648, 1565 and 1510  $\text{cm}^{-1}$ .

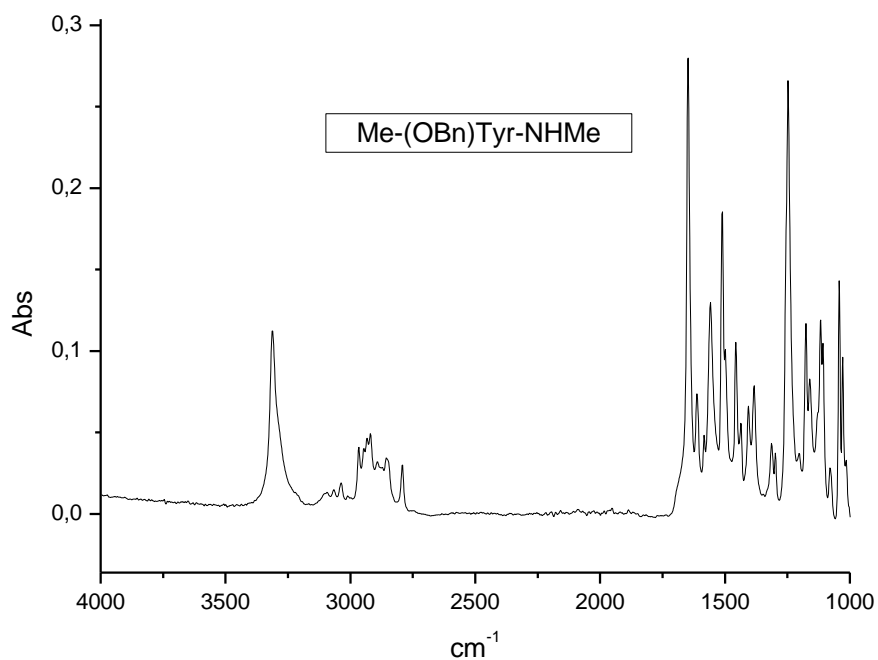

ATR-IR spectrm of **3e** (solid), maxima at 3252, 3094, 2921, 1648, 1469 and 1256  $\text{cm}^{-1}$ .

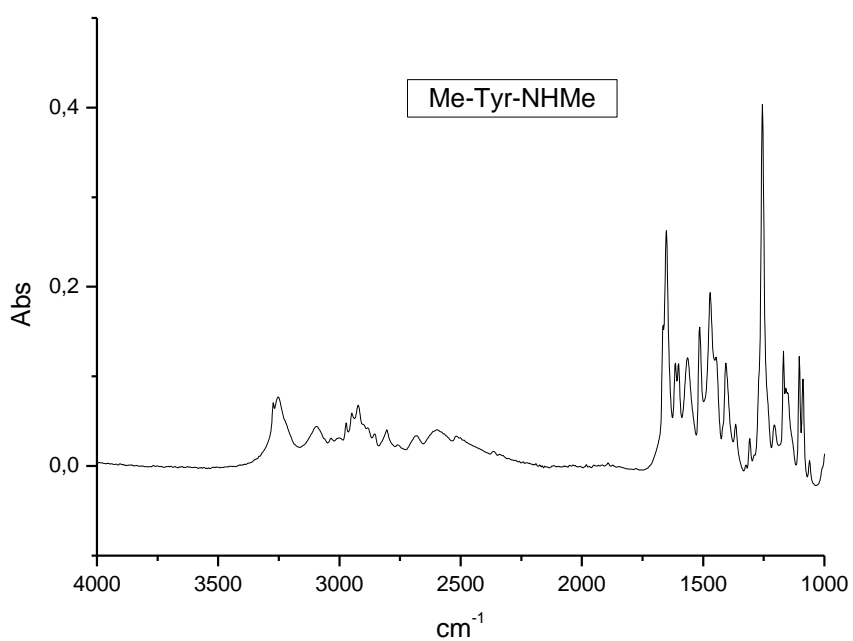

### Comparison between **3a**, **3b** and **3c**

4000-2800  $\text{cm}^{-1}$  region

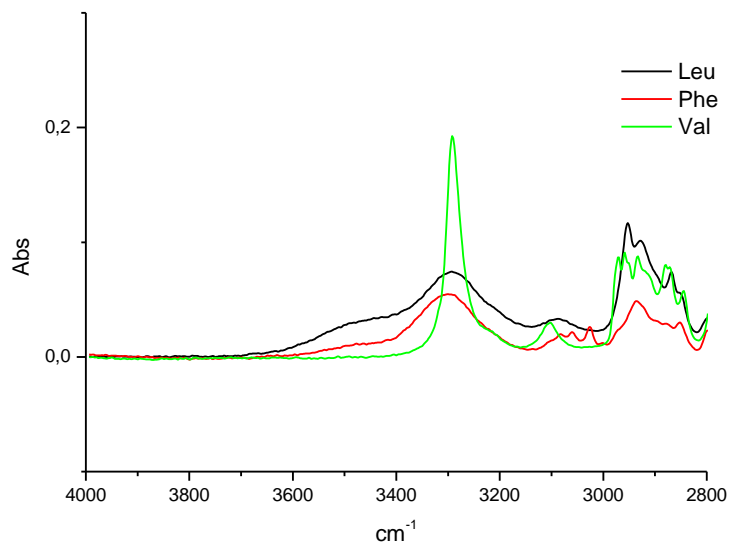

1800-1400  $\text{cm}^{-1}$  region

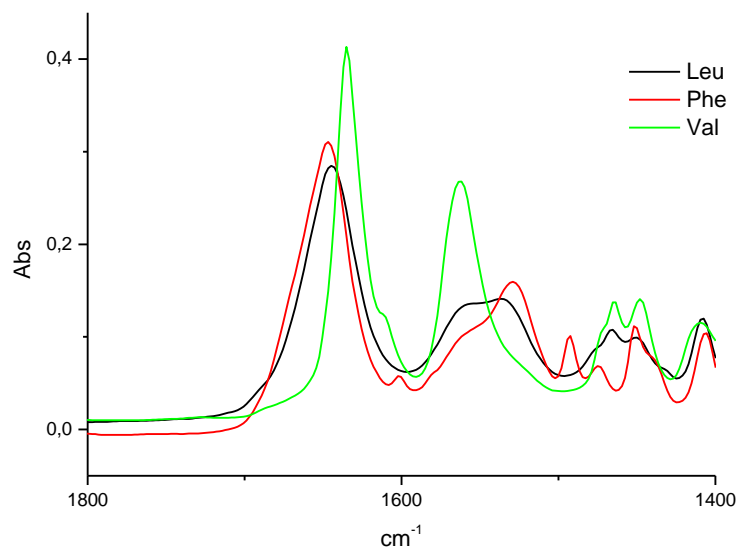

## Thermal analysis

Differential Scanning Calorimetry (DSC) analyses were performed on a Mettler Toledo DSC821 apparatus. Samples were cooled down to -50°C and then heated up to +150°C.

DSC curve of **3a** (white solid at room temperature), showing its melting point at 69.0 °C.

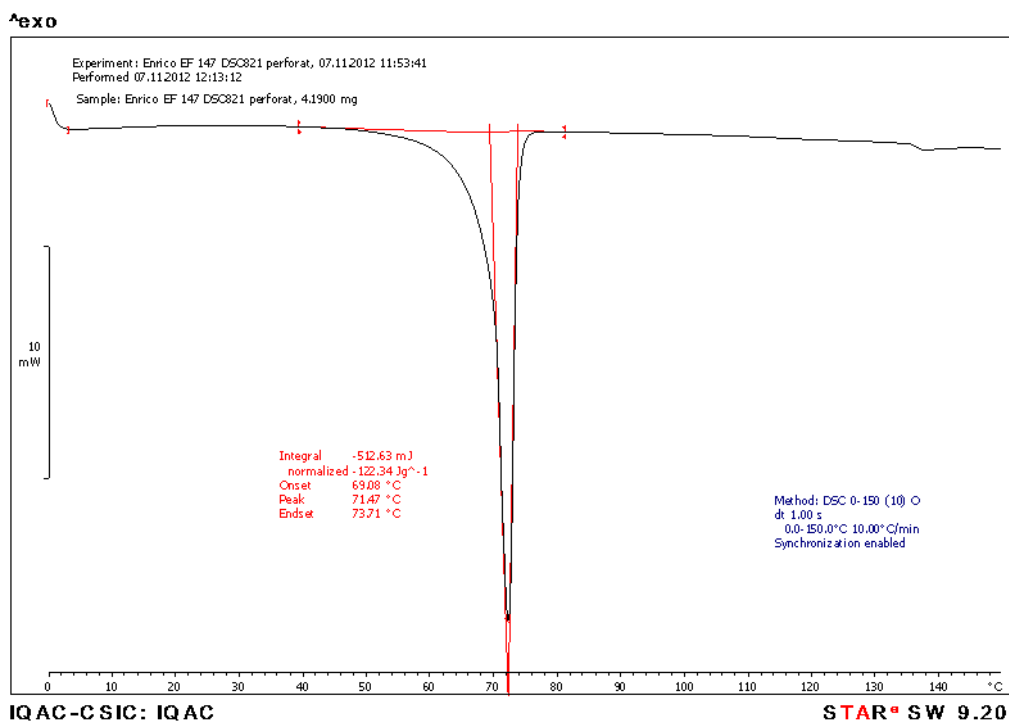

DSC curve of **3b** (pale yellow oil at room temperature), showing a vitreous transition between 35.4 °C and 74.1 °C.

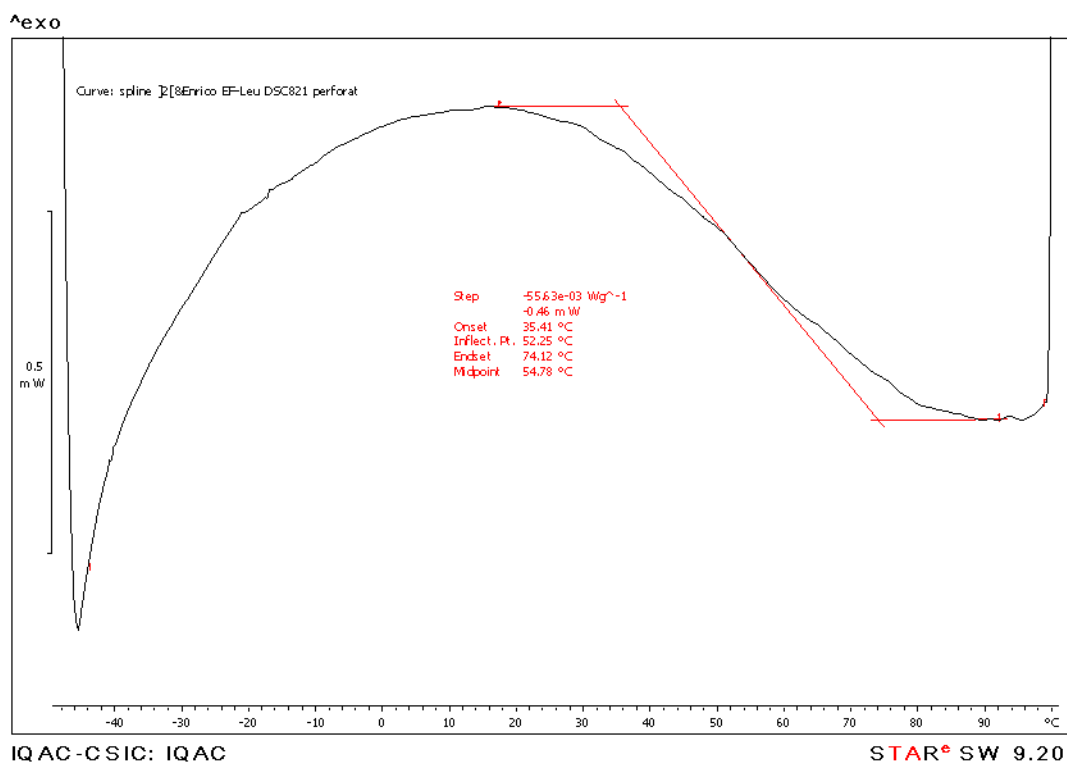

DSC curve of **3c** (pale yellow oil at room temperature), showing a vitreous transition between -34.3 °C and -30.9 °C.

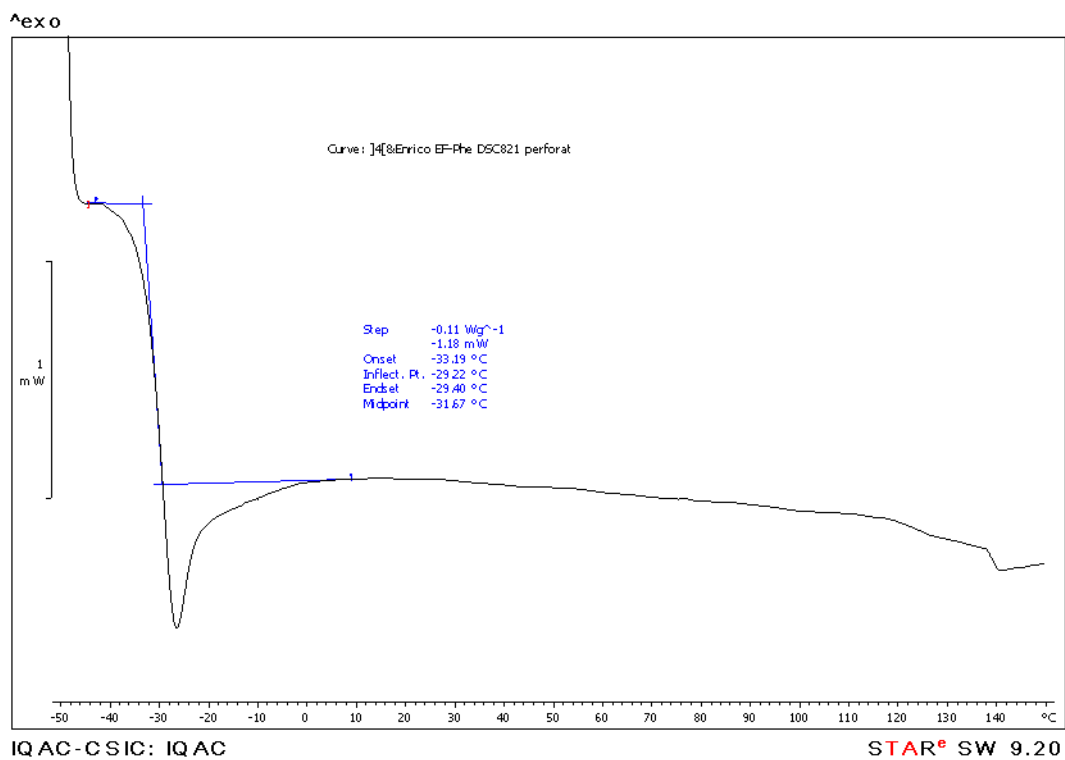

## Molecular modelling

All the theoretical calculations were performed with the Spartan 06 program on a Dell workstation. An initial conformational analysis was performed at the HF/6-31G\* level of theory by a Monte Carlo search followed by full unrestricted minimization. In this way, we obtained about 15-20 geometries for each molecule within a 10 kcal/mol cut-off. The representative local minima thus obtained were fully re-optimized by DFT calculations at the B3LYP/6-311+G\*\* level of theory, including the frequency analysis. All the optimized geometries showed positive frequencies and thus, they are minima of energy. The energetically accessible conformers thus obtained were ordered according to their relative energy and the corresponding Boltzmann distribution at 298 K calculated using the same software. Besides, for every minimum, we computed the corresponding CPK areas and the polar surface area (PSA). The obtained values for every compound, as well as the Cartesian coordinates for every minimum, are shown following. All the calculations were performed in the gas phase. The electrostatic potential (ESP) mapped onto the global electron density surfaces was computed at Isoval = 0.002, 0.003, 0.004, 0.005, 0.006, 0.007, 0.008, 0.009, 0.010, 0.015, and 0.020 au using the B3LYP/6-311+G\*\* wavefunction and with the facilities also available in this package. The graphics of the ESP electron densities were displayed using Spartan 06. The dimers of **3a** were manually built from two isolated molecules of the conformer I, by the rotation of the CO-C $\alpha$  bond in order to form an extended conformation of the backbone. The possible parallel and anti-parallel dimeric non-covalent complexes were fully optimized at the B3LYP/6-31+G\* level of theory also using the Spartan 06 software.

### Conformer distribution for **3a** (Val)

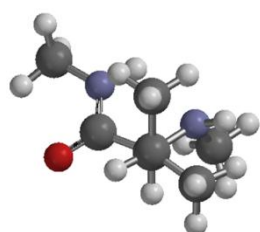

Conf. I (0.00)

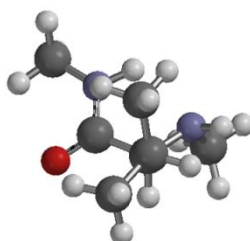

Conf. II (0.55)

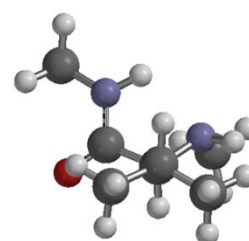

Conf. III (0.75)

| Val           | E (kcal/mol) | rel. E (kcal/mol) | Boltzm. Dist. | CPK Area (Å <sup>2</sup> ) | PSA (Å <sup>2</sup> ) | PSA/CPKA |
|---------------|--------------|-------------------|---------------|----------------------------|-----------------------|----------|
| conformer I   | -289446.45   | 0                 | 0.594362899   | 201.434559                 | 33.734603             | 0.16747  |
| conformer II  | -289445.904  | 0.545707796       | 0.236631686   | 200.942952                 | 33.935504             | 0.16888  |
| conformer III | -289445.705  | 0.74513675        | 0.169005415   | 199.819661                 | 34.053257             | 0.17042  |

### **Conformer I**

Cartesian Coordinates (Angstroms)

| Atom   | X          | Y          | Z          |
|--------|------------|------------|------------|
| 1 C CA | -0.2561979 | -0.2038962 | -0.5977569 |
| 2 C C  | 1.1628902  | 0.3886750  | -0.7282694 |
| 3 O O  | 1.4548855  | 1.0952133  | -1.6852947 |
| 4 H HA | -0.4823197 | -0.5979079 | -1.6000211 |

|    |   |     |            |            |            |
|----|---|-----|------------|------------|------------|
| 5  | C | CB  | -1.2695259 | 0.9417503  | -0.3324588 |
| 6  | N | N2  | 2.0108124  | 0.0783812  | 0.2817065  |
| 7  | H | H4  | 1.6158835  | -0.4916289 | 1.0199263  |
| 8  | C | C1  | 3.3744965  | 0.5684757  | 0.3569875  |
| 9  | H | H2  | 4.0759175  | -0.2572882 | 0.5045954  |
| 10 | H | H5  | 3.4976206  | 1.2839579  | 1.1765333  |
| 11 | H | H6  | 3.6053253  | 1.0703105  | -0.5819282 |
| 12 | C | C2  | -0.0435820 | -2.6082032 | -0.1150367 |
| 13 | H | H3  | -0.1555776 | -3.3436338 | 0.6849257  |
| 14 | H | H7  | 0.9882453  | -2.6602414 | -0.4725091 |
| 15 | H | H8  | -0.7017639 | -2.8948467 | -0.9500289 |
| 16 | N | N1  | -0.3206945 | -1.2694486 | 0.4081708  |
| 17 | H | H11 | -1.2216896 | -1.2635411 | 0.8699500  |
| 18 | H | H1  | -1.0386520 | 1.6958852  | -1.0906036 |
| 19 | C | C3  | -2.7161753 | 0.4788901  | -0.5592180 |
| 20 | H | H9  | -3.0280813 | -0.2840525 | 0.1630625  |
| 21 | H | H10 | -2.8500503 | 0.0644746  | -1.5625654 |
| 22 | H | H12 | -3.4063999 | 1.3199271  | -0.4493613 |
| 23 | C | C4  | -1.1015566 | 1.5921678  | 1.0493000  |
| 24 | H | H13 | -0.0883208 | 1.9743735  | 1.1934740  |
| 25 | H | H14 | -1.3124509 | 0.8896944  | 1.8618715  |
| 26 | H | H15 | -1.7930386 | 2.4325119  | 1.1545485  |

### Conformer II

Cartesian Coordinates (Angstroms)

|    | Atom  | X          | Y          | Z          |
|----|-------|------------|------------|------------|
| 1  | C CA  | -0.3370652 | 0.4886670  | 0.5247379  |
| 2  | C C   | 0.7664313  | -0.5865558 | 0.6214175  |
| 3  | O O   | 0.7389908  | -1.4469408 | 1.4930448  |
| 4  | H HA  | -0.5481983 | 0.7741191  | 1.5659967  |
| 5  | C CB  | -1.6539099 | -0.0920371 | -0.0650327 |
| 6  | N N2  | 1.7224865  | -0.5001502 | -0.3359682 |
| 7  | H H4  | 1.6208656  | 0.2774246  | -0.9764450 |
| 8  | C C1  | 2.8392774  | -1.4205565 | -0.4370678 |
| 9  | H H2  | 2.8686453  | -1.8920419 | -1.4233969 |
| 10 | H H5  | 2.7124114  | -2.1924786 | 0.3210543  |
| 11 | H H6  | 3.7916827  | -0.9100133 | -0.2641336 |
| 12 | C C2  | 0.8580624  | 2.6450499  | 0.5120852  |
| 13 | H H3  | 1.1013943  | 3.4937276  | -0.1312335 |
| 14 | H H7  | 1.7995414  | 2.2168622  | 0.8662189  |
| 15 | H H8  | 0.3078526  | 3.0167074  | 1.3904118  |
| 16 | N N1  | 0.1133019  | 1.6475701  | -0.2587185 |
| 17 | H H11 | -0.6853480 | 2.0862964  | -0.7030272 |
| 18 | H H1  | -2.3160345 | 0.7789648  | -0.1813108 |
| 19 | C C3  | -1.4714998 | -0.7270654 | -1.4513099 |
| 20 | H H9  | -0.8690946 | -1.6379791 | -1.3898684 |
| 21 | H H10 | -0.9824762 | -0.0470021 | -2.1533818 |
| 22 | H H12 | -2.4436838 | -1.0012229 | -1.8702890 |
| 23 | C C4  | -2.3478852 | -1.0598884 | 0.9023399  |
| 24 | H H13 | -2.5430053 | -0.5843559 | 1.8675834  |
| 25 | H H14 | -1.7360869 | -1.9442227 | 1.0906247  |
| 26 | H H15 | -3.3066556 | -1.3828786 | 0.4856680  |



### Conformer III

Cartesian Coordinates (Angstroms)

| Atom     | X          | Y          | Z          |
|----------|------------|------------|------------|
| 1 C CA   | -0.3074435 | -0.2548508 | -0.4043017 |
| 2 C C    | 1.0887884  | 0.3904189  | -0.5209478 |
| 3 O O    | 1.4093766  | 1.0678325  | -1.4882812 |
| 4 H HA   | -0.6506496 | -0.3832238 | -1.4430047 |
| 5 C CB   | -1.3061179 | 0.6899202  | 0.3197582  |
| 6 N N2   | 1.8931882  | 0.1781963  | 0.5510658  |
| 7 H H4   | 1.5659251  | -0.5135995 | 1.2133463  |
| 8 C C1   | 3.2558234  | 0.6767323  | 0.6173072  |
| 9 H H2   | 3.2962459  | 1.6817397  | 0.1965467  |
| 10 H H5  | 3.9528867  | 0.0464037  | 0.0536801  |
| 11 H H6  | 3.5756373  | 0.7119617  | 1.6598814  |
| 12 C C2  | 0.3259443  | -2.6297858 | -0.5163388 |
| 13 H H3  | 0.3418686  | -3.5493451 | 0.0729254  |
| 14 H H7  | 1.3543481  | -2.4063721 | -0.8123884 |
| 15 H H8  | -0.2536959 | -2.8112256 | -1.4348674 |
| 16 N N1  | -0.2044166 | -1.5374215 | 0.3016551  |
| 17 H H11 | -1.1074121 | -1.8017653 | 0.6743672  |
| 18 H H1  | -0.9966516 | 0.7307172  | 1.3719374  |
| 19 C C3  | -1.2828165 | 2.1177810  | -0.2426730 |
| 20 H H9  | -1.5489039 | 2.1297692  | -1.3039220 |
| 21 H H10 | -0.3011749 | 2.5833609  | -0.1498248 |
| 22 H H12 | -2.0060595 | 2.7384741  | 0.2936920  |
| 23 C C4  | -2.7399128 | 0.1348554  | 0.2595308  |
| 24 H H13 | -2.8498837 | -0.8411171 | 0.7421102  |
| 25 H H14 | -3.0754975 | 0.0355325  | -0.7780914 |
| 26 H H15 | -3.4293967 | 0.8150110  | 0.7668374  |

### Conformer distribution for **3b** (Leu)

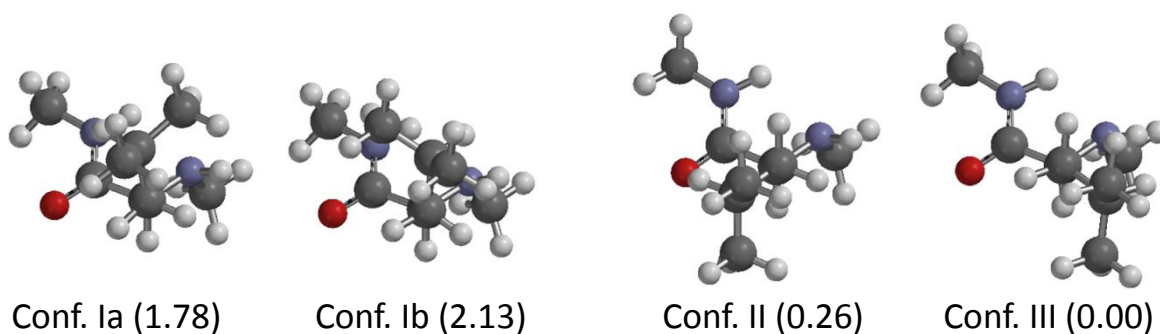

| Leu           | E (kcal/mol) | rel. E (kcal/mol) | Boltzm. Dist. | CPK Area (Å <sup>2</sup> ) | PSA (Å <sup>2</sup> ) | PSA/CPKA |
|---------------|--------------|-------------------|---------------|----------------------------|-----------------------|----------|
| Conformer III | -314123.385  | 0                 | 0.580587011   | 221.727161                 | 34.089998             | 0.15375  |
| Conformer II  | -314123.126  | 0.25918673        | 0.374882637   | 221.642363                 | 34.937194             | 0.15763  |
| Conformer Ia  | -314121.603  | 1.78201545        | 0.028690076   | 220.540544                 | 33.796751             | 0.15325  |
| Conformer Ib  | -314121.251  | 2.13397326        | 0.015840277   | 219.797974                 | 34.340184             | 0.15624  |

### Conformer Ia

Cartesian Coordinates (Angstroms)

|    | Atom  | X          | Y          | Z          |
|----|-------|------------|------------|------------|
| 1  | C CA  | -0.4169804 | -0.6636524 | 0.9217861  |
| 2  | C C   | -1.2127957 | 0.6569232  | 0.8797153  |
| 3  | O O   | -1.2370837 | 1.4047206  | 1.8491645  |
| 4  | H HA  | -0.6669442 | -1.1025146 | 1.8997222  |
| 5  | C CB  | 1.0967182  | -0.3546923 | 0.9654545  |
| 6  | N N2  | -1.8474205 | 0.9102866  | -0.2897905 |
| 7  | H H4  | -1.7096037 | 0.2248791  | -1.0212607 |
| 8  | C C1  | -2.6035513 | 2.1267066  | -0.5275391 |
| 9  | H H2  | -1.9764635 | 2.9245641  | -0.9404353 |
| 10 | H H5  | -3.0169821 | 2.4761392  | 0.4185694  |
| 11 | H H6  | -3.4180606 | 1.9231986  | -1.2249342 |
| 12 | C C2  | -1.9515426 | -2.4258613 | 0.1504865  |
| 13 | H H3  | -2.1291755 | -3.1171740 | -0.6762796 |
| 14 | H H7  | -2.8467902 | -1.8096133 | 0.2669275  |
| 15 | H H8  | -1.8236135 | -3.0097442 | 1.0755632  |
| 16 | N N1  | -0.7986267 | -1.5782433 | -0.1629264 |
| 17 | H H11 | -0.0081443 | -2.1602840 | -0.4126528 |
| 18 | H H1  | 1.6383817  | -1.3078832 | 1.0436435  |
| 19 | C C3  | 1.7145374  | 0.4927390  | -0.1669296 |
| 20 | H H9  | 1.0728305  | 1.3698098  | -0.3177284 |
| 21 | C C5  | 3.0948178  | 1.0037999  | 0.2741577  |
| 22 | H H12 | 3.0245205  | 1.5988317  | 1.1888848  |
| 23 | H H16 | 3.5484359  | 1.6292882  | -0.5001966 |
| 24 | H H17 | 3.7792561  | 0.1700721  | 0.4688795  |
| 25 | C C6  | 1.8276506  | -0.2472456 | -1.5085225 |
| 26 | H H10 | 0.8543778  | -0.5585602 | -1.8914921 |
| 27 | H H18 | 2.4565436  | -1.1406081 | -1.4101378 |
| 28 | H H19 | 2.2938074  | 0.3944351  | -2.2622901 |
| 29 | H H20 | 1.2619012  | 0.1696829  | 1.9101610  |

### Conformer Ib

Cartesian Coordinates (Angstroms)

|    | Atom  | X          | Y          | Z          |
|----|-------|------------|------------|------------|
| 1  | C CA  | -0.3972503 | -0.7765798 | 0.7692512  |
| 2  | C C   | -1.2937244 | 0.4792985  | 0.7759314  |
| 3  | O O   | -1.3580290 | 1.1951664  | 1.7670608  |
| 4  | H HA  | -0.6834421 | -1.3020621 | 1.6930806  |
| 5  | C CB  | 1.0979116  | -0.4265589 | 0.9416250  |
| 6  | N N2  | -1.9945288 | 0.6960828  | -0.3630390 |
| 7  | H H4  | -1.7889345 | 0.0663433  | -1.1285349 |
| 8  | C C1  | -2.8552909 | 1.8504910  | -0.5463099 |
| 9  | H H2  | -2.3020886 | 2.7175893  | -0.9249222 |
| 10 | H H5  | -3.2931641 | 2.1232889  | 0.4138988  |
| 11 | H H6  | -3.6515842 | 1.6054799  | -1.2510923 |
| 12 | C C2  | -1.6643950 | -2.6587545 | -0.1932021 |
| 13 | H H3  | -1.7501832 | -3.2753198 | -1.0908968 |
| 14 | H H7  | -2.6338993 | -2.1838741 | -0.0215356 |
| 15 | H H8  | -1.4563890 | -3.3164071 | 0.6654023  |
| 16 | N N1  | -0.6406386 | -1.6325761 | -0.3989797 |
| 17 | H H11 | 0.2250261  | -2.0641919 | -0.6990819 |
| 18 | H H1  | 1.6056989  | -1.3616499 | 1.2081280  |

|    |   |     |           |            |            |
|----|---|-----|-----------|------------|------------|
| 19 | C | C3  | 1.8533714 | 0.2086181  | -0.2471514 |
| 20 | H | H9  | 1.6351515 | -0.3694471 | -1.1550569 |
| 21 | C | C5  | 1.4550846 | 1.6680761  | -0.5123158 |
| 22 | H | H12 | 0.4026727 | 1.7677278  | -0.7809379 |
| 23 | H | H16 | 2.0478774 | 2.0827742  | -1.3332230 |
| 24 | H | H17 | 1.6290109 | 2.2862080  | 0.3741057  |
| 25 | C | C6  | 3.3664528 | 0.1127428  | 0.0059373  |
| 26 | H | H10 | 3.6882097 | -0.9239473 | 0.1452208  |
| 27 | H | H18 | 3.6456531 | 0.6717518  | 0.9056725  |
| 28 | H | H19 | 3.9324567 | 0.5294519  | -0.8321399 |
| 29 | H | H20 | 1.1789643 | 0.2302780  | 1.8131049  |

### Conformer II

Cartesian Coordinates (Angstroms)

|    | Atom | X   | Y          | Z          |            |
|----|------|-----|------------|------------|------------|
| 1  | C    | CA  | -0.4111472 | -0.6537511 | 0.2407689  |
| 2  | C    | C   | -1.0808799 | 0.7154748  | 0.4734724  |
| 3  | O    | O   | -0.7621835 | 1.4311726  | 1.4151624  |
| 4  | H    | HA  | -0.1681411 | -1.0305019 | 1.2436578  |
| 5  | C    | CB  | 0.8918728  | -0.4953382 | -0.5713623 |
| 6  | N    | N2  | -1.9937033 | 1.0596582  | -0.4683525 |
| 7  | H    | H4  | -2.2304782 | 0.3300121  | -1.1290544 |
| 8  | C    | C1  | -2.7378085 | 2.3056669  | -0.4285816 |
| 9  | H    | H2  | -2.1285938 | 3.0649659  | 0.0611457  |
| 10 | H    | H5  | -3.6745256 | 2.2068532  | 0.1316335  |
| 11 | H    | H6  | -2.9681552 | 2.6288038  | -1.4455235 |
| 12 | C    | C2  | -2.3007430 | -2.2280113 | 0.3852400  |
| 13 | H    | H3  | -2.8966642 | -2.9211900 | -0.2127691 |
| 14 | H    | H7  | -2.9815495 | -1.4846877 | 0.8091241  |
| 15 | H    | H8  | -1.8500508 | -2.7843781 | 1.2217852  |
| 16 | N    | N1  | -1.3153898 | -1.5661280 | -0.4714233 |
| 17 | H    | H11 | -0.7726857 | -2.2594699 | -0.9739590 |
| 18 | H    | H1  | 0.6251168  | -0.1304349 | -1.5702891 |
| 19 | C    | C3  | 1.9881878  | 0.4084138  | 0.0228031  |
| 20 | H    | H9  | 1.5580363  | 1.4007870  | 0.1925142  |
| 21 | C    | C5  | 2.5094477  | -0.1094246 | 1.3701231  |
| 22 | H    | H12 | 1.7286750  | -0.1051380 | 2.1329110  |
| 23 | H    | H16 | 3.3251754  | 0.5222156  | 1.7334459  |
| 24 | H    | H17 | 2.8982691  | -1.1305965 | 1.2761954  |
| 25 | C    | C6  | 3.1352516  | 0.5539649  | -0.9879349 |
| 26 | H    | H10 | 2.7826235  | 0.9694688  | -1.9369431 |
| 27 | H    | H18 | 3.6016783  | -0.4150323 | -1.2008656 |
| 28 | H    | H19 | 3.9145333  | 1.2180192  | -0.6028899 |
| 29 | H    | H20 | 1.3138320  | -1.5013942 | -0.7100345 |

### Conformer III

Cartesian Coordinates (Angstroms)

|   | Atom | X  | Y          | Z          |           |
|---|------|----|------------|------------|-----------|
| 1 | C    | CA | -0.3754780 | -0.2481552 | 0.3176836 |
| 2 | C    | C  | -1.6599888 | 0.5651692  | 0.5850473 |
| 3 | O    | O  | -1.7573886 | 1.2716512  | 1.5801631 |
| 4 | H    | HA | -0.0930187 | -0.6551657 | 1.2985305 |

|    |   |     |            |            |            |
|----|---|-----|------------|------------|------------|
| 5  | C | CB  | 0.7230223  | 0.7240677  | -0.1538176 |
| 6  | N | N2  | -2.6114333 | 0.4477609  | -0.3721819 |
| 7  | H | H4  | -2.3785517 | -0.1766807 | -1.1345067 |
| 8  | C | C1  | -3.8704026 | 1.1680095  | -0.3402585 |
| 9  | H | H2  | -3.9258901 | 1.9113086  | -1.1421089 |
| 10 | H | H5  | -3.9407488 | 1.6819015  | 0.6177496  |
| 11 | H | H6  | -4.7146554 | 0.4802349  | -0.4405839 |
| 12 | C | C2  | -1.0767079 | -2.5778691 | -0.0863703 |
| 13 | H | H3  | -1.1797988 | -3.3228726 | -0.8785498 |
| 14 | H | H7  | -2.0629658 | -2.4299131 | 0.3613802  |
| 15 | H | H8  | -0.4122153 | -2.9833321 | 0.6920660  |
| 16 | N | N1  | -0.5981051 | -1.3191199 | -0.6606972 |
| 17 | H | H11 | 0.2465888  | -1.4841102 | -1.1943618 |
| 18 | H | H1  | 0.6714354  | 1.6146418  | 0.4795140  |
| 19 | C | C3  | 2.1674802  | 0.1822900  | -0.1257319 |
| 20 | H | H9  | 2.2086413  | -0.7615425 | -0.6879433 |
| 21 | C | C6  | 2.6558475  | -0.0984633 | 1.3024078  |
| 22 | H | H10 | 2.0463970  | -0.8493056 | 1.8111793  |
| 23 | H | H18 | 2.6240194  | 0.8155792  | 1.9043861  |
| 24 | H | H19 | 3.6878835  | -0.4608418 | 1.2962927  |
| 25 | H | H20 | 0.4752801  | 1.0448758  | -1.1734328 |
| 26 | C | C4  | 3.1066851  | 1.1722429  | -0.8307171 |
| 27 | H | H12 | 4.1377868  | 0.8072254  | -0.8301854 |
| 28 | H | H13 | 3.0977552  | 2.1434876  | -0.3245145 |
| 29 | H | H14 | 2.8085262  | 1.3369257  | -1.8704387 |

Conformer distribution for 3c (Phe)

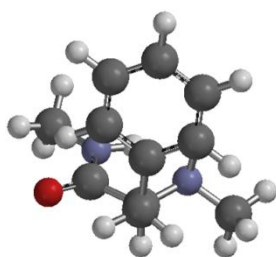

Conf. I (0.74)

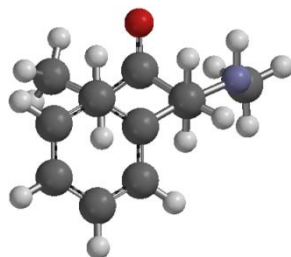

Conf. II (2.33)

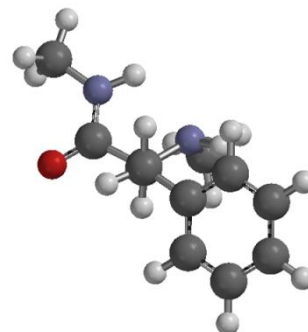

Conf. III (0.00)

| Phe           | E (kcal/mol) | rel. E (kcal/mol) | Boltzm. Dist. | CPK Area (Å <sup>2</sup> ) | PSA (Å <sup>2</sup> ) | PSA/CPKA |
|---------------|--------------|-------------------|---------------|----------------------------|-----------------------|----------|
| conformer III | -385116.925  | 0                 | 0.765144281   | 244.67005                  | 33.749913             | 0.13794  |
| conformer I   | -385116.186  | 0.739162854       | 0.219771238   | 242.361124                 | 32.672415             | 0.13481  |
| conformer II  | -385114.599  | 2.32649333        | 0.015084482   | 246.010173                 | 37.439279             | 0.15219  |

**Conformer I**

Cartesian Coordinates (Angstroms)

| Atom   | X         | Y          | Z          |
|--------|-----------|------------|------------|
| 1 C CA | 1.2513372 | -0.5904526 | -0.5996017 |
| 2 C C  | 1.6878397 | 0.8870737  | -0.4655390 |

|    |   |     |            |            |            |
|----|---|-----|------------|------------|------------|
| 3  | O | O   | 1.6467812  | 1.6474257  | -1.4261877 |
| 4  | H | HA  | 2.0856322  | -1.0662193 | -1.1297323 |
| 5  | C | CB  | 0.0035496  | -0.7192931 | -1.5186218 |
| 6  | C | CG  | -1.2826794 | -0.2379856 | -0.8842787 |
| 7  | H | 2HB | -0.1018560 | -1.7702372 | -1.8024556 |
| 8  | H | 1HB | 0.2112264  | -0.1540691 | -2.4290134 |
| 9  | C | CZ  | -3.6540539 | 0.6520728  | 0.3466262  |
| 10 | C | CD1 | -2.1450273 | -1.1379692 | -0.2447172 |
| 11 | C | CD2 | -1.6366298 | 1.1186365  | -0.9043424 |
| 12 | C | CE2 | -2.8097852 | 1.5582180  | -0.2950170 |
| 13 | C | CE1 | -3.3192092 | -0.6997554 | 0.3680661  |
| 14 | H | HD1 | -1.9053946 | -2.1971815 | -0.2422445 |
| 15 | H | HD2 | -0.9837495 | 1.8269333  | -1.4016083 |
| 16 | H | HE2 | -3.0683377 | 2.6110833  | -0.3265489 |
| 17 | H | HE1 | -3.9744452 | -1.4152668 | 0.8530542  |
| 18 | N | N2  | 2.1419742  | 1.2330424  | 0.7599817  |
| 19 | H | H4  | 2.1561012  | 0.4843496  | 1.4417069  |
| 20 | C | C1  | 2.6805877  | 2.5455110  | 1.0649339  |
| 21 | H | H2  | 3.7759360  | 2.5430283  | 1.0668161  |
| 22 | H | H5  | 2.3283175  | 2.8788362  | 2.0437724  |
| 23 | H | H6  | 2.3398499  | 3.2447176  | 0.3020360  |
| 24 | N | N1  | 1.1455255  | -1.2504311 | 0.7055286  |
| 25 | H | H1  | 0.2322339  | -1.0551682 | 1.1065168  |
| 26 | C | C2  | 1.3809610  | -2.6946222 | 0.6901877  |
| 27 | H | H3  | 0.7090931  | -3.2582946 | 0.0252296  |
| 28 | H | H7  | 1.2630043  | -3.0885013 | 1.7020942  |
| 29 | H | H8  | 2.4092618  | -2.8909228 | 0.3751697  |
| 30 | H | H10 | -4.5680447 | 0.9954412  | 0.8181883  |

### Conformer II

Cartesian Coordinates (Angstroms)

|    | Atom  | X          | Y          | Z          |
|----|-------|------------|------------|------------|
| 1  | C CA  | 1.2327482  | -0.7941349 | 0.0120703  |
| 2  | C C   | 1.3154620  | 0.7239957  | 0.2873694  |
| 3  | O O   | 1.8015978  | 1.1441488  | 1.3298584  |
| 4  | H HA  | 1.0137610  | -0.9653431 | -1.0487876 |
| 5  | C CB  | 0.0946173  | -1.4144925 | 0.8582716  |
| 6  | C CG  | -1.2852458 | -0.8994943 | 0.5155789  |
| 7  | H 2HB | 0.3143007  | -1.2214585 | 1.9124377  |
| 8  | H 1HB | 0.1471582  | -2.4954306 | 0.7066523  |
| 9  | C CZ  | -3.8362436 | 0.0738921  | -0.1671511 |
| 10 | C CD1 | -1.8854423 | 0.1223630  | 1.2600905  |
| 11 | C CD2 | -1.9891623 | -1.4282634 | -0.5738257 |
| 12 | C CE2 | -3.2520393 | -0.9477600 | -0.9149174 |
| 13 | C CE1 | -3.1489021 | 0.6063171  | 0.9224300  |
| 14 | H HD1 | -1.3578644 | 0.5392647  | 2.1121228  |
| 15 | H HD2 | -1.5475889 | -2.2342319 | -1.1524262 |
| 16 | H HE2 | -3.7835693 | -1.3770025 | -1.7573743 |
| 17 | H HE1 | -3.5985881 | 1.3957864  | 1.5148152  |
| 18 | H HZ  | -4.8211610 | 0.4459249  | -0.4263950 |
| 19 | N N2  | 0.8383034  | 1.5407903  | -0.6889672 |
| 20 | H H4  | 0.3421413  | 1.1164985  | -1.4571476 |
| 21 | C C1  | 0.7352672  | 2.9823571  | -0.5130645 |

|    |   |     |            |            |            |
|----|---|-----|------------|------------|------------|
| 22 | H | H2  | -0.1886305 | 3.2636785  | 0.0032668  |
| 23 | H | H5  | 0.7621603  | 3.4707786  | -1.4882345 |
| 24 | H | H6  | 1.5800328  | 3.3228743  | 0.0841553  |
| 25 | C | C2  | 3.5998832  | -1.1132314 | -0.5546182 |
| 26 | H | H3  | 4.4927516  | -1.6529063 | -0.2321465 |
| 27 | H | H7  | 3.8351061  | -0.0379425 | -0.5662904 |
| 28 | H | H8  | 3.3772489  | -1.4266946 | -1.5790494 |
| 29 | N | N1  | 2.4835061  | -1.4760152 | 0.3188333  |
| 30 | H | H11 | 2.7283911  | -1.2642682 | 1.2824432  |

### Conformer III

Cartesian Coordinates (Angstroms)

|    | Atom  | X          | Y          | Z          |
|----|-------|------------|------------|------------|
| 1  | C CA  | -0.7730896 | 0.1683021  | 0.4303920  |
| 2  | C C   | -2.1997137 | 0.7354943  | 0.2999866  |
| 3  | O O   | -2.5370696 | 1.7499260  | 0.8965966  |
| 4  | H HA  | -0.4862031 | 0.3357341  | 1.4790931  |
| 5  | C CB  | 0.1618667  | 1.0155587  | -0.4660850 |
| 6  | C CG  | 1.6285599  | 0.6862749  | -0.2946960 |
| 7  | H 2HB | -0.0176520 | 2.0647927  | -0.2197422 |
| 8  | H 1HB | -0.1321803 | 0.8711098  | -1.5105581 |
| 9  | C CZ  | 4.3504156  | 0.0605375  | 0.0473436  |
| 10 | C CD1 | 2.3203368  | 1.0934387  | 0.8539392  |
| 11 | C CD2 | 2.3276907  | -0.0342982 | -1.2690144 |
| 12 | C CE2 | 3.6776539  | -0.3462606 | -1.1014510 |
| 13 | C CE1 | 3.6666422  | 0.7843042  | 1.0249165  |
| 14 | H HD1 | 1.7998636  | 1.6668428  | 1.6146368  |
| 15 | H HD2 | 1.8151250  | -0.3417005 | -2.1753444 |
| 16 | H HE2 | 4.2023837  | -0.9011103 | -1.8714860 |
| 17 | H HE1 | 4.1859038  | 1.1141072  | 1.9180538  |
| 18 | H HZ  | 5.4000043  | -0.1771404 | 0.1790072  |
| 19 | N N2  | -3.0055747 | 0.0598664  | -0.5508778 |
| 20 | H H4  | -2.6137970 | -0.7752576 | -0.9659698 |
| 21 | C C1  | -4.3653971 | 0.4853509  | -0.8355679 |
| 22 | H H2  | -4.3790133 | 1.4934321  | -1.2577789 |
| 23 | H H5  | -4.9715888 | 0.4951635  | 0.0739989  |
| 24 | H H6  | -4.8086222 | -0.2070394 | -1.5515582 |
| 25 | C C2  | -1.1040808 | -2.1574797 | 1.1471301  |
| 26 | H H3  | -0.9901739 | -3.1900860 | 0.8104419  |
| 27 | H H7  | -2.1564240 | -2.0033663 | 1.3998044  |
| 28 | H H8  | -0.5138635 | -2.0208460 | 2.0660867  |
| 29 | N N1  | -0.7106694 | -1.2481457 | 0.0676622  |
| 30 | H H11 | 0.2286668  | -1.4775054 | -0.2389601 |

Conformer distribution for 3e (Tyr)

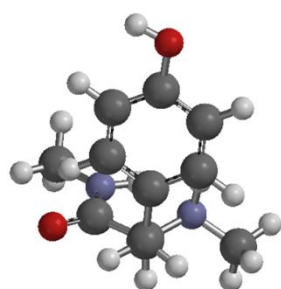

Conf. Ia (0.68)

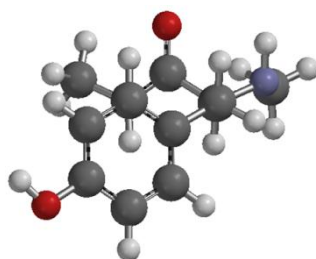

Conf. IIa (2.42)

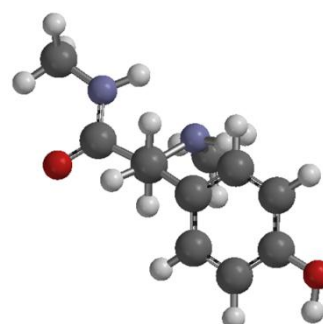

Conf. IIIa (0.00)

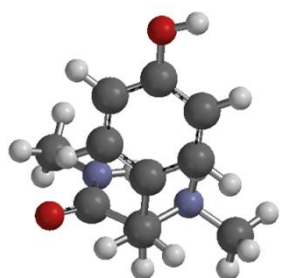

Conf. Ib (0.92)

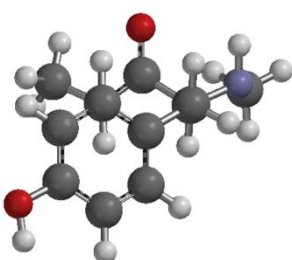

Conf. IIb (2.54)

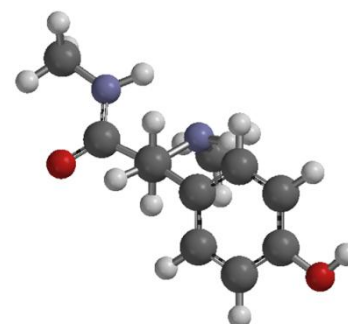

Conf. IIIb (0.03)

| Tyr            | E (kcal/mol) | rel. E (kcal/mol) | Boltzm. Dist. | CPK Area (Å <sup>2</sup> ) | PSA (Å <sup>2</sup> ) | PSA/CPKA |
|----------------|--------------|-------------------|---------------|----------------------------|-----------------------|----------|
| conformer IIIa | -432335.311  | 0                 | 0.397239751   | 253.547423                 | 53.249317             | 0.21002  |
| conformer IIIb | -432335.284  | 0.026763302       | 0.379696355   | 253.545255                 | 53.24676              | 0.21001  |
| Conformer Ia   | -432334.634  | 0.677616673       | 0.126587478   | 251.175877                 | 52.267903             | 0.20809  |
| conformer Ib   | -432334.393  | 0.918442461       | 0.084309495   | 251.388224                 | 52.46461              | 0.2087   |
| conformer IIa  | -432332.896  | 2.41551817        | 0.006738894   | 254.994364                 | 57.194246             | 0.2243   |
| conformer IIb  | -432332.768  | 2.54369336        | 0.005428028   | 254.877466                 | 57.171952             | 0.22431  |

**Conformer Ia**

Cartesian Coordinates (Angstroms)

| Atom     | X          | Y          | Z          |
|----------|------------|------------|------------|
| 1 C CA   | 1.4251122  | -0.6596514 | -0.6208959 |
| 2 C C    | 1.8577941  | 0.8196785  | -0.4899728 |
| 3 O O    | 1.8027526  | 1.5818610  | -1.4489059 |
| 4 H HA   | 2.2639199  | -1.1368480 | -1.1428923 |
| 5 C CB   | 0.1815290  | -0.7950962 | -1.5430393 |
| 6 C CG   | -1.1086453 | -0.3077165 | -0.9211412 |
| 7 H 2HB  | 0.0767660  | -1.8485379 | -1.8182706 |
| 8 H 1HB  | 0.3938112  | -0.2407008 | -2.4590751 |
| 9 C CZ   | -3.4931415 | 0.5928222  | 0.2821999  |
| 10 C CD1 | -1.9871615 | -1.1966220 | -0.2870781 |
| 11 C CD2 | -1.4628631 | 1.0471251  | -0.9457973 |
| 12 C CE2 | -2.6396277 | 1.4967207  | -0.3522621 |
| 13 C CE1 | -3.1660555 | -0.7614682 | 0.3121042  |
| 14 H HD1 | -1.7569248 | -2.2577467 | -0.2752679 |

|    |   |     |            |            |            |
|----|---|-----|------------|------------|------------|
| 15 | H | HD2 | -0.8065302 | 1.7575077  | -1.4352713 |
| 16 | H | HE2 | -2.8954697 | 2.5520609  | -0.3887884 |
| 17 | H | HE1 | -3.8423550 | -1.4572810 | 0.7941848  |
| 18 | N | N2  | 2.3289883  | 1.1619306  | 0.7304144  |
| 19 | H | H4  | 2.3264387  | 0.4163061  | 1.4159769  |
| 20 | C | C1  | 2.8532272  | 2.4779830  | 1.0437447  |
| 21 | H | H2  | 3.9192797  | 2.4312039  | 1.2866874  |
| 22 | H | H5  | 2.3194235  | 2.9188648  | 1.8904505  |
| 23 | H | H6  | 2.7194822  | 3.1129658  | 0.1688651  |
| 24 | N | N1  | 1.3122718  | -1.3122207 | 0.6878764  |
| 25 | H | H1  | 0.3954872  | -1.1152384 | 1.0801931  |
| 26 | C | C2  | 1.5480408  | -2.7564774 | 0.6819958  |
| 27 | H | H3  | 0.8826294  | -3.3234924 | 0.0134225  |
| 28 | H | H7  | 1.4202345  | -3.1451860 | 1.6947061  |
| 29 | H | H8  | 2.5792940  | -2.9544267 | 0.3777679  |
| 30 | O | O1  | -4.6639627 | 0.9758352  | 0.8836680  |
| 31 | H | H9  | -4.7837452 | 1.9258448  | 0.7844005  |

### Conformer Ib

Cartesian Coordinates (Angstroms)

|    | Atom  | X          | Y          | Z          |
|----|-------|------------|------------|------------|
| 1  | C CA  | 1.4376897  | -0.6031426 | -0.6436417 |
| 2  | C C   | 1.8667045  | 0.8764546  | -0.5093828 |
| 3  | O O   | 1.8143879  | 1.6396559  | -1.4674716 |
| 4  | H HA  | 2.2751334  | -1.0759325 | -1.1717061 |
| 5  | C CB  | 0.1901792  | -0.7385273 | -1.5611491 |
| 6  | C CG  | -1.0999600 | -0.2645621 | -0.9291121 |
| 7  | H 2HB | 0.0908228  | -1.7901426 | -1.8452189 |
| 8  | H 1HB | 0.3951435  | -0.1748722 | -2.4733487 |
| 9  | C CZ  | -3.4825167 | 0.6175070  | 0.2917890  |
| 10 | C CD1 | -1.9725883 | -1.1645517 | -0.3094960 |
| 11 | C CD2 | -1.4591415 | 1.0924938  | -0.9307156 |
| 12 | C CE2 | -2.6318465 | 1.5332182  | -0.3296953 |
| 13 | C CE1 | -3.1533077 | -0.7366061 | 0.2987075  |
| 14 | H HD1 | -1.7415741 | -2.2254507 | -0.3132704 |
| 15 | H HD2 | -0.8049331 | 1.8103178  | -1.4122534 |
| 16 | H HE2 | -2.9051258 | 2.5816880  | -0.3389686 |
| 17 | H HE1 | -3.8177662 | -1.4577017 | 0.7667274  |
| 18 | N N2  | 2.3262881  | 1.2236062  | 0.7136124  |
| 19 | H H4  | 2.3471059  | 0.4755729  | 1.3957004  |
| 20 | C C1  | 2.8540264  | 2.5408860  | 1.0170145  |
| 21 | H H2  | 3.9482488  | 2.5626302  | 0.9616027  |
| 22 | H H5  | 2.5462735  | 2.8446603  | 2.0203725  |
| 23 | H H6  | 2.4598556  | 3.2495969  | 0.2887857  |
| 24 | N N1  | 1.3326336  | -1.2614965 | 0.6628202  |
| 25 | H H1  | 0.4175144  | -1.0668922 | 1.0601838  |
| 26 | C C2  | 1.5698157  | -2.7053076 | 0.6493078  |
| 27 | H H3  | 0.9011677  | -3.2706813 | -0.0175816 |
| 28 | H H7  | 1.4491539  | -3.0986720 | 1.6611661  |
| 29 | H H8  | 2.5993315  | -2.9008108 | 0.3377600  |
| 30 | O O1  | -4.6259398 | 1.1056224  | 0.8692381  |
| 31 | H H9  | -5.1267763 | 0.3814396  | 1.2582238  |



### Conformer IIa

Cartesian Coordinates (Angstroms)

| Atom     | X          | Y          | Z          |
|----------|------------|------------|------------|
| 1 C CA   | 1.4173864  | -0.8431140 | 0.0096604  |
| 2 C C    | 1.4924588  | 0.6752361  | 0.2839432  |
| 3 O O    | 1.9645235  | 1.0995237  | 1.3314532  |
| 4 H HA   | 1.2072816  | -1.0151497 | -1.0529600 |
| 5 C CB   | 0.2746620  | -1.4666069 | 0.8469806  |
| 6 C CG   | -1.1034846 | -0.9424175 | 0.5126941  |
| 7 H 2HB  | 0.4957110  | -1.2862370 | 1.9032972  |
| 8 H 1HB  | 0.3235769  | -2.5465138 | 0.6860186  |
| 9 C CZ   | -3.6540331 | 0.0499363  | -0.1548730 |
| 10 C CD1 | -1.7018843 | 0.0714650  | 1.2656705  |
| 11 C CD2 | -1.8192933 | -1.4504408 | -0.5798521 |
| 12 C CE2 | -3.0781989 | -0.9662608 | -0.9182799 |
| 13 C CE1 | -2.9633402 | 0.5681323  | 0.9403889  |
| 14 H HD1 | -1.1762896 | 0.4819841  | 2.1217497  |
| 15 H HD2 | -1.3881041 | -2.2519240 | -1.1721570 |
| 16 H HE2 | -3.6296495 | -1.3705656 | -1.7587609 |
| 17 H HE1 | -3.4095650 | 1.3537913  | 1.5437855  |
| 18 N N2  | 1.0242327  | 1.4893466  | -0.6990652 |
| 19 H H4  | 0.5385550  | 1.0626568  | -1.4725414 |
| 20 C C1  | 0.9203246  | 2.9312660  | -0.5287560 |
| 21 H H2  | -0.0035013 | 3.2144478  | -0.0131388 |
| 22 H H5  | 0.9465906  | 3.4158540  | -1.5058517 |
| 23 H H6  | 1.7648420  | 3.2750402  | 0.0670352  |
| 24 C C2  | 3.7922013  | -1.1515979 | -0.5341509 |
| 25 H H3  | 4.6830967  | -1.6907460 | -0.2052853 |
| 26 H H7  | 4.0251420  | -0.0757153 | -0.5386329 |
| 27 H H8  | 3.5805476  | -1.4607729 | -1.5622164 |
| 28 N N1  | 2.6679535  | -1.5208554 | 0.3261608  |
| 29 H H11 | 2.9020461  | -1.3130494 | 1.2932427  |
| 30 O O1  | -4.8965114 | 0.4938795  | -0.5259935 |
| 31 H H1  | -5.1972771 | 1.1694075  | 0.0904344  |

### Conformer IIb

Cartesian Coordinates (Angstroms)

| Atom     | X          | Y          | Z          |
|----------|------------|------------|------------|
| 1 C CA   | 1.7058429  | -0.7729803 | -0.1320933 |
| 2 C C    | 1.7512958  | 0.7436183  | 0.1577877  |
| 3 O O    | 2.2403317  | 1.1652176  | 1.1985378  |
| 4 H HA   | 1.4604072  | -0.9403400 | -1.1879343 |
| 5 C CB   | 0.6127652  | -1.4360006 | 0.7403641  |
| 6 C CG   | -0.7911510 | -0.9522695 | 0.4558559  |
| 7 H 2HB  | 0.8652921  | -1.2539992 | 1.7893256  |
| 8 H 1HB  | 0.6886720  | -2.5129950 | 0.5711446  |
| 9 C CZ   | -3.3907390 | -0.0306406 | -0.1165917 |
| 10 C CD1 | -1.3834425 | 0.0664462  | 1.2133633  |
| 11 C CD2 | -1.5380568 | -1.5009134 | -0.5912126 |
| 12 C CE2 | -2.8243754 | -1.0498064 | -0.8824839 |
| 13 C CE1 | -2.6663149 | 0.5274024  | 0.9368239  |
| 14 H HD1 | -0.8300103 | 0.5057400  | 2.0370840  |

|    |   |     |            |            |            |
|----|---|-----|------------|------------|------------|
| 15 | H | HD2 | -1.1151521 | -2.3048688 | -1.1858177 |
| 16 | H | HE2 | -3.3882606 | -1.4982837 | -1.6956178 |
| 17 | H | HE1 | -3.1208587 | 1.3117231  | 1.5303181  |
| 18 | N | N2  | 1.2397596  | 1.5583127  | -0.8028635 |
| 19 | H | H4  | 0.7510156  | 1.1295900  | -1.5731400 |
| 20 | C | C1  | 1.1061793  | 2.9958531  | -0.6148747 |
| 21 | H | H2  | 0.1705104  | 3.2543822  | -0.1079362 |
| 22 | H | H5  | 1.1360672  | 3.4949900  | -1.5846971 |
| 23 | H | H6  | 1.9368362  | 3.3458830  | -0.0036452 |
| 24 | C | C2  | 4.0634750  | -1.0103652 | -0.7733822 |
| 25 | H | H3  | 4.9851821  | -1.5161989 | -0.4782712 |
| 26 | H | H7  | 4.2572499  | 0.0732442  | -0.7884018 |
| 27 | H | H8  | 3.8239842  | -1.3296158 | -1.7922322 |
| 28 | N | N1  | 2.9868681  | -1.4173882 | 0.1299611  |
| 29 | H | H11 | 3.2538194  | -1.2043586 | 1.0874782  |
| 30 | O | O1  | -4.6502282 | 0.4586240  | -0.3469487 |
| 31 | H | H1  | -5.0548483 | -0.0141626 | -1.0813928 |

### Conformer IIIa

Cartesian Coordinates (Angstroms)

|    | Atom  | X          | Y          | Z          |
|----|-------|------------|------------|------------|
| 1  | C CA  | 0.9786722  | 0.1531733  | -0.4075786 |
| 2  | C C   | 2.4139489  | 0.7061133  | -0.3038585 |
| 3  | O O   | 2.7427617  | 1.7134170  | -0.9167993 |
| 4  | H HA  | 0.6812882  | 0.3137200  | -1.4544744 |
| 5  | C CB  | 0.0642149  | 1.0213300  | 0.4904420  |
| 6  | C CG  | -1.4092509 | 0.7153264  | 0.3360123  |
| 7  | H 2HB | 0.2613701  | 2.0657606  | 0.2373452  |
| 8  | H 1HB | 0.3653101  | 0.8787632  | 1.5333311  |
| 9  | C CZ  | -4.1472731 | 0.1290692  | 0.0261618  |
| 10 | C CD1 | -2.1168613 | 0.0081808  | 1.3153869  |
| 11 | C CD2 | -2.1120471 | 1.1283938  | -0.8017405 |
| 12 | C CE2 | -3.4644290 | 0.8417380  | -0.9617628 |
| 13 | C CE1 | -3.4701111 | -0.2868956 | 1.1707082  |
| 14 | H HD1 | -1.6046031 | -0.3081437 | 2.2187141  |
| 15 | H HD2 | -1.5984276 | 1.6926089  | -1.5736651 |
| 16 | H HE2 | -3.9902742 | 1.1791987  | -1.8504407 |
| 17 | H HE1 | -4.0118981 | -0.8299079 | 1.9357800  |
| 18 | N N2  | 3.2213654  | 0.0198757  | 0.5410866  |
| 19 | H H4  | 2.8095978  | -0.8047697 | 0.9605054  |
| 20 | C C1  | 4.5951467  | 0.3967469  | 0.8189294  |
| 21 | H H2  | 4.8089196  | 1.3171851  | 0.2769590  |
| 22 | H H5  | 5.2931835  | -0.3786154 | 0.4885733  |
| 23 | H H6  | 4.7440822  | 0.5707285  | 1.8885912  |
| 24 | N N1  | 0.9011372  | -1.2583138 | -0.0304482 |
| 25 | H H1  | -0.0377795 | -1.4698048 | 0.2899845  |
| 26 | C C2  | 1.2663502  | -2.1840706 | -1.1057089 |
| 27 | H H3  | 1.1391080  | -3.2116133 | -0.7583304 |
| 28 | H H7  | 2.3180144  | -2.0497942 | -1.3720198 |
| 29 | H H8  | 0.6678505  | -2.0460928 | -2.0192530 |
| 30 | O O1  | -5.4774027 | -0.1826982 | -0.0726541 |
| 31 | H H9  | -5.8319642 | 0.1593905  | -0.8997769 |

### Conformer IIIb

Cartesian Coordinates (Angstroms)

|    | Atom  | X          | Y          | Z          |
|----|-------|------------|------------|------------|
| 1  | C CA  | 0.9791432  | 0.1644715  | -0.4624060 |
| 2  | C C   | 2.4155714  | 0.7172609  | -0.3747697 |
| 3  | O O   | 2.7475149  | 1.7036732  | -1.0188854 |
| 4  | H HA  | 0.6832822  | 0.2923221  | -1.5141352 |
| 5  | C CB  | 0.0663504  | 1.0623547  | 0.4075809  |
| 6  | C CG  | -1.4068157 | 0.7471295  | 0.2705702  |
| 7  | H 2HB | 0.2588973  | 2.0974129  | 0.1152835  |
| 8  | H 1HB | 0.3722473  | 0.9584151  | 1.4536782  |
| 9  | C CZ  | -4.1452494 | 0.1501185  | -0.0126900 |
| 10 | C CD1 | -2.1084671 | 0.0826840  | 1.2790297  |
| 11 | C CD2 | -2.1151743 | 1.1102835  | -0.8847655 |
| 12 | C CE2 | -3.4646665 | 0.8193549  | -1.0324507 |
| 13 | C CE1 | -3.4653098 | -0.2174994 | 1.1463696  |
| 14 | H HD1 | -1.5955968 | -0.1972435 | 2.1937720  |
| 15 | H HD2 | -1.6011997 | 1.6402010  | -1.6805893 |
| 16 | H HE2 | -4.0078444 | 1.1091865  | -1.9239663 |
| 17 | H HE1 | -3.9900013 | -0.7305241 | 1.9474026  |
| 18 | N N2  | 3.2205365  | 0.0568053  | 0.4929107  |
| 19 | H H4  | 2.8069664  | -0.7536286 | 0.9374499  |
| 20 | C C1  | 4.5956838  | 0.4382513  | 0.7576347  |
| 21 | H H2  | 4.8033001  | 1.3563824  | 0.2093697  |
| 22 | H H5  | 5.2939744  | -0.3364929 | 0.4260421  |
| 23 | H H6  | 4.7515493  | 0.6176339  | 1.8253404  |
| 24 | N N1  | 0.8976168  | -1.2343247 | -0.0408179 |
| 25 | H H1  | -0.0432167 | -1.4317829 | 0.2831826  |
| 26 | C C2  | 1.2606289  | -2.1944002 | -1.0866658 |
| 27 | H H3  | 1.1291773  | -3.2102392 | -0.7077509 |
| 28 | H H7  | 2.3130939  | -2.0724985 | -1.3556424 |
| 29 | H H8  | 0.6635845  | -2.0825153 | -2.0045677 |
| 30 | O O1  | -5.4753716 | -0.1105249 | -0.2095833 |
| 31 | H H9  | -5.8402054 | -0.5522671 | 0.5640698  |

Val dimer in antiparallel  $\beta$ -sheet

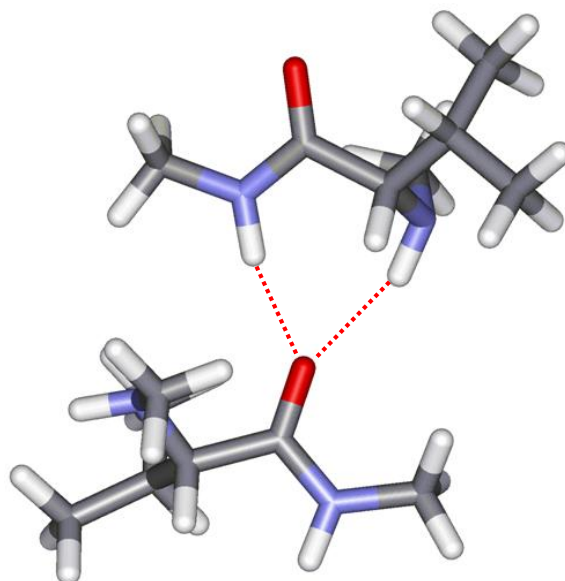

E = -578732.695 kcal/mol

Cartesian Coordinates (Angstroms)

| Atom     | X          | Y          | Z          |
|----------|------------|------------|------------|
| 1 C CA   | 2.5182249  | -0.1271635 | 0.1999406  |
| 2 C C    | 2.2325546  | 1.3965650  | 0.1658068  |
| 3 O O    | 3.1151007  | 2.2590696  | 0.1799360  |
| 4 H HA   | 1.8146787  | -0.5422120 | 0.9346294  |
| 5 C CB   | 3.9341943  | -0.4561826 | 0.7385682  |
| 6 N N2   | 0.9113929  | 1.7196019  | 0.1155138  |
| 7 C C1   | 0.4676199  | 3.1008411  | 0.0335470  |
| 8 H H2   | 0.9261031  | 3.6980952  | 0.8290177  |
| 9 H H5   | -0.6194118 | 3.1152056  | 0.1449787  |
| 10 H H6  | 0.7420635  | 3.5577759  | -0.9260721 |
| 11 C C2  | 2.4787128  | -0.1235955 | -2.3210487 |
| 12 H H3  | 2.1466896  | -0.7618440 | -3.1483416 |
| 13 H H7  | 3.5540298  | 0.0311731  | -2.4326799 |
| 14 H H8  | 1.9857024  | 0.8586712  | -2.4288946 |
| 15 N N1  | 2.1813240  | -0.8150619 | -1.0638951 |
| 16 H H11 | 1.1910470  | -1.0437349 | -1.0422277 |
| 17 H H1  | 4.0875868  | 0.2121033  | 1.5976565  |
| 18 C C3  | 3.9761626  | -1.9069062 | 1.2454402  |
| 19 H H9  | 3.7583181  | -2.6065614 | 0.4295876  |
| 20 H H10 | 3.2412009  | -2.0783812 | 2.0437675  |
| 21 H H12 | 4.9675325  | -2.1500426 | 1.6483005  |
| 22 C C4  | 5.0902524  | -0.2052507 | -0.2430540 |
| 23 H H13 | 5.0759055  | 0.8193734  | -0.6238426 |
| 24 H H14 | 5.0516225  | -0.9060759 | -1.0860540 |
| 25 H H15 | 6.0493105  | -0.3636348 | 0.2674539  |
| 26 O O1  | -0.8339021 | -0.7743801 | -0.1595410 |
| 27 C C5  | -1.9579870 | -1.1796729 | 0.1489066  |
| 28 N N3  | -2.2573898 | -2.5035450 | 0.1661715  |
| 29 H H18 | -3.1929396 | -2.7851197 | 0.4255399  |
| 30 C C6  | -1.3062939 | -3.5303235 | -0.2436476 |

|    |   |     |            |            |            |
|----|---|-----|------------|------------|------------|
| 31 | H | H17 | -1.2026617 | -3.5682000 | -1.3345907 |
| 32 | H | H19 | -1.6572819 | -4.4996539 | 0.1177239  |
| 33 | H | H20 | -0.3248573 | -3.3186870 | 0.1873135  |
| 34 | C | C7  | -3.1273740 | -0.2397998 | 0.5067836  |
| 35 | H | H21 | -3.8166153 | -0.8218564 | 1.1563988  |
| 36 | N | N4  | -2.6251277 | 0.9362176  | 1.1969344  |
| 37 | H | H16 | -3.3642903 | 1.6313199  | 1.2551091  |
| 38 | C | C8  | -2.1032260 | 0.6692294  | 2.5376147  |
| 39 | H | H23 | -1.1815244 | 0.0832355  | 2.4659365  |
| 40 | H | H24 | -2.8134002 | 0.1207987  | 3.1845988  |
| 41 | H | H25 | -1.8549199 | 1.6183438  | 3.0220215  |
| 42 | C | C9  | -3.9322344 | 0.1275472  | -0.7777912 |
| 43 | H | H22 | -4.1908121 | -0.8319783 | -1.2490439 |
| 44 | C | C10 | -3.1277648 | 0.9519168  | -1.7948332 |
| 45 | H | H26 | -2.1930843 | 0.4559405  | -2.0718850 |
| 46 | H | H28 | -2.8711465 | 1.9380790  | -1.3937525 |
| 47 | H | H29 | -3.7201188 | 1.1011614  | -2.7057661 |
| 48 | C | C11 | -5.2595476 | 0.8226084  | -0.4251181 |
| 49 | H | H27 | -5.8373530 | 0.2505068  | 0.3120675  |
| 50 | H | H30 | -5.8787962 | 0.9325382  | -1.3230423 |
| 51 | H | H31 | -5.1034517 | 1.8329368  | -0.0252396 |
| 52 | H | H32 | 0.2101278  | 0.9838407  | 0.0764083  |

**Val dimer in parallel  $\beta$ -sheet**

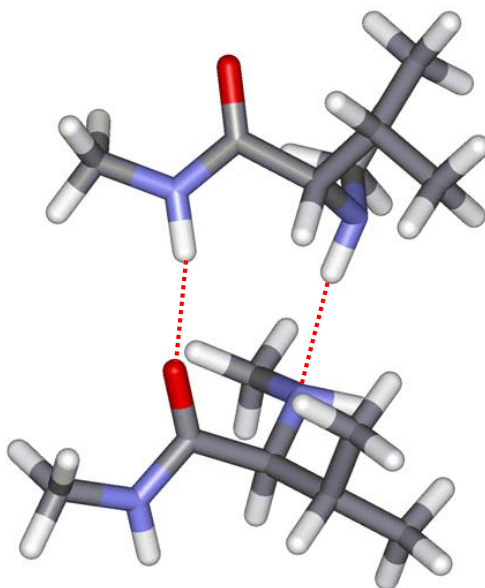

E = -578732.638 kcal/mol

Cartesian Coordinates (Angstroms)

| Atom   | X         | Y          | Z          |
|--------|-----------|------------|------------|
| 1 C CA | 2.1812174 | -0.2014817 | 0.3959243  |
| 2 C C  | 2.4524325 | 1.3081303  | 0.1737551  |
| 3 O O  | 3.5803262 | 1.7895006  | 0.0350902  |
| 4 H HA | 1.3768712 | -0.2530694 | 1.1426305  |
| 5 C CB | 3.3938648 | -0.9338558 | 1.0297160  |
| 6 N N2 | 1.3311992 | 2.0750416  | 0.1125771  |
| 7 C C1 | 1.4036799 | 3.5069608  | -0.1234463 |

|    |   |     |            |            |            |
|----|---|-----|------------|------------|------------|
| 8  | H | H2  | 1.9476123  | 4.0148475  | 0.6820669  |
| 9  | H | H5  | 0.3853657  | 3.9012798  | -0.1722193 |
| 10 | H | H6  | 1.9222560  | 3.7244671  | -1.0643484 |
| 11 | C | C2  | 2.1702600  | -0.4808722 | -2.1058412 |
| 12 | H | H3  | 1.6322171  | -1.0417204 | -2.8794044 |
| 13 | H | H7  | 3.2268251  | -0.7453619 | -2.1830476 |
| 14 | H | H8  | 2.0784257  | 0.5952849  | -2.3361707 |
| 15 | N | N1  | 1.6265723  | -0.8680349 | -0.8010310 |
| 16 | H | H11 | 0.6158211  | -0.7310658 | -0.8199407 |
| 17 | H | H1  | 3.7678835  | -0.2569483 | 1.8109397  |
| 18 | C | C3  | 2.9285575  | -2.2340752 | 1.7066086  |
| 19 | H | H9  | 2.4619461  | -2.9044759 | 0.9749838  |
| 20 | H | H10 | 2.1957599  | -2.0372320 | 2.5006337  |
| 21 | H | H12 | 3.7766964  | -2.7623083 | 2.1604476  |
| 22 | C | C4  | 4.5677407  | -1.2220994 | 0.0799606  |
| 23 | H | H13 | 4.9004847  | -0.3156529 | -0.4319073 |
| 24 | H | H14 | 4.2991995  | -1.9831644 | -0.6629487 |
| 25 | H | H15 | 5.4156353  | -1.6166697 | 0.6553357  |
| 26 | O | O1  | -1.5229982 | 1.2492469  | 0.5477601  |
| 27 | C | C5  | -2.6001885 | 0.7260041  | 0.2574444  |
| 28 | N | N3  | -3.7811258 | 1.2787171  | 0.6410287  |
| 29 | H | H18 | -4.6431243 | 0.8611933  | 0.3185503  |
| 30 | C | C6  | -3.8452472 | 2.5076127  | 1.4220327  |
| 31 | H | H17 | -3.2043964 | 2.4269239  | 2.3044351  |
| 32 | H | H19 | -4.8782131 | 2.6675531  | 1.7394598  |
| 33 | H | H20 | -3.5111173 | 3.3702187  | 0.8338270  |
| 34 | C | C7  | -2.7272416 | -0.6064311 | -0.5102445 |
| 35 | H | H21 | -3.7041512 | -0.5772833 | -1.0392614 |
| 36 | N | N4  | -1.6315977 | -0.7416090 | -1.4587367 |
| 37 | H | H16 | -1.6066616 | -1.6968753 | -1.8054055 |
| 38 | C | C8  | -1.7027278 | 0.1861740  | -2.5889252 |
| 39 | H | H23 | -1.5361342 | 1.2086497  | -2.2355552 |
| 40 | H | H24 | -2.6713363 | 0.1541441  | -3.1215385 |
| 41 | H | H25 | -0.9067560 | -0.0533778 | -3.2999312 |
| 42 | C | C9  | -2.8063061 | -1.8022648 | 0.4876689  |
| 43 | H | H22 | -3.6340565 | -1.5573596 | 1.1691727  |
| 44 | C | C10 | -1.5374693 | -1.9909477 | 1.3328157  |
| 45 | H | H26 | -1.2656806 | -1.0747078 | 1.8656931  |
| 46 | H | H28 | -0.6818808 | -2.2835468 | 0.7150816  |
| 47 | H | H29 | -1.7019449 | -2.7815664 | 2.0745948  |
| 48 | C | C11 | -3.1916072 | -3.1071458 | -0.2323057 |
| 49 | H | H27 | -4.0895013 | -2.9825057 | -0.8510544 |
| 50 | H | H30 | -3.3982492 | -3.8928730 | 0.5035918  |
| 51 | H | H31 | -2.3831596 | -3.4828231 | -0.8727242 |
| 52 | H | H32 | 0.4176108  | 1.6529926  | 0.2533650  |

ESP onto the electronic density surface for conformer I of **3c** at selected representative isovalues.

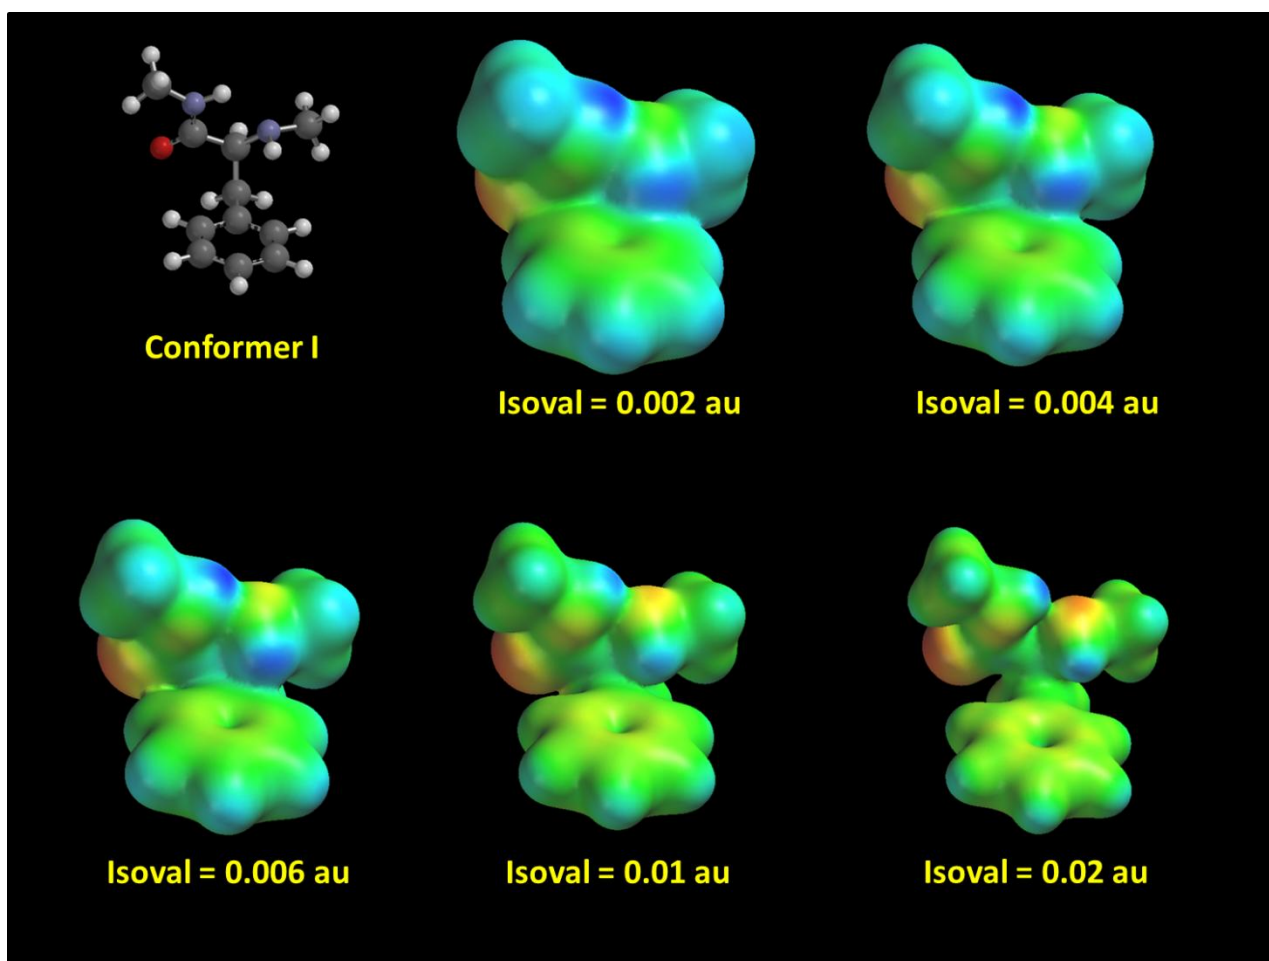

ESP onto the electronic density surface for conformer II of **3c** at selected representative isovalues.

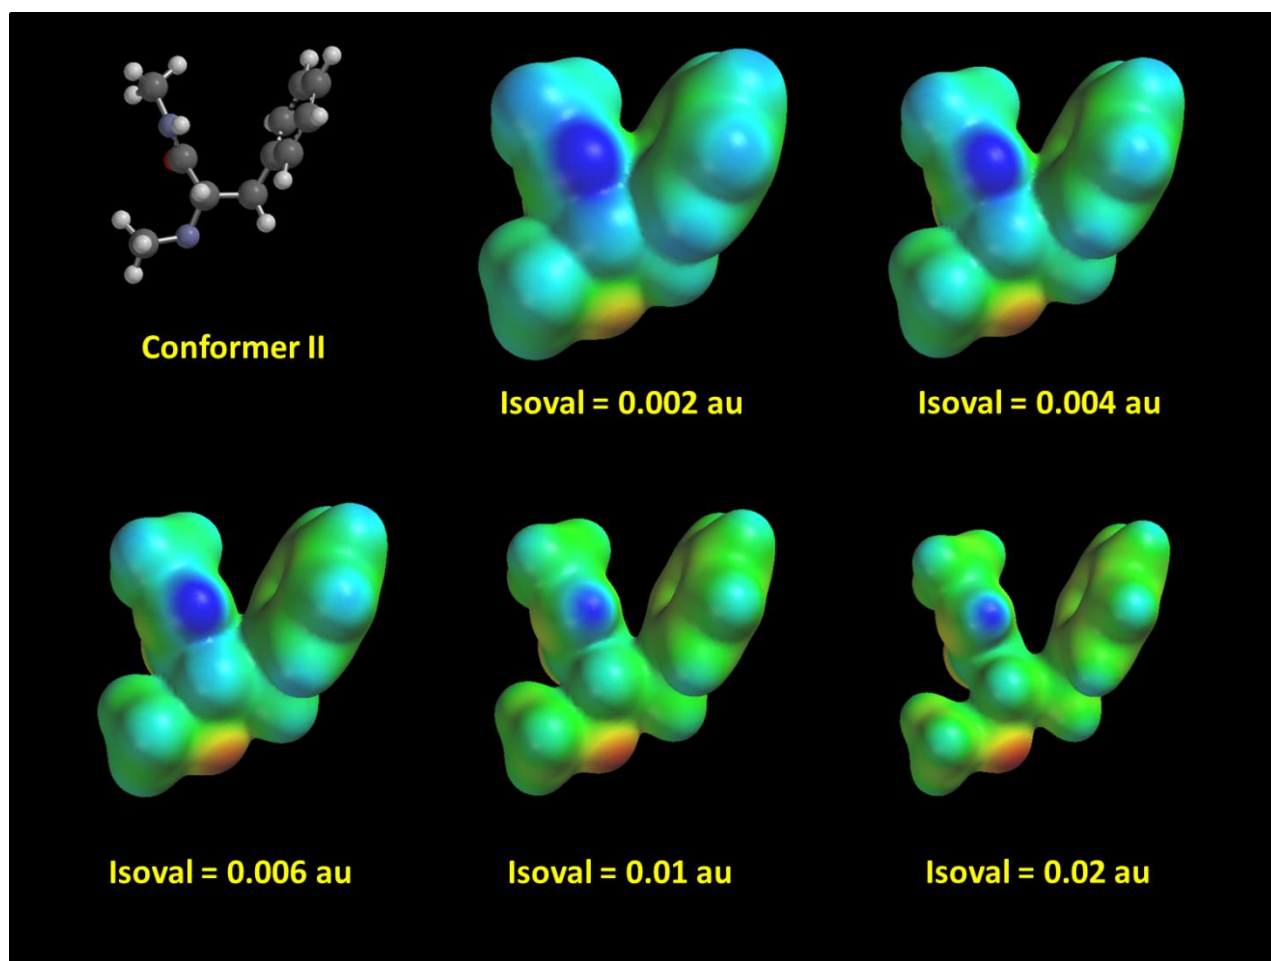



ESP onto the electronic density surface for conformer III of **3c** at selected representative isovalues.

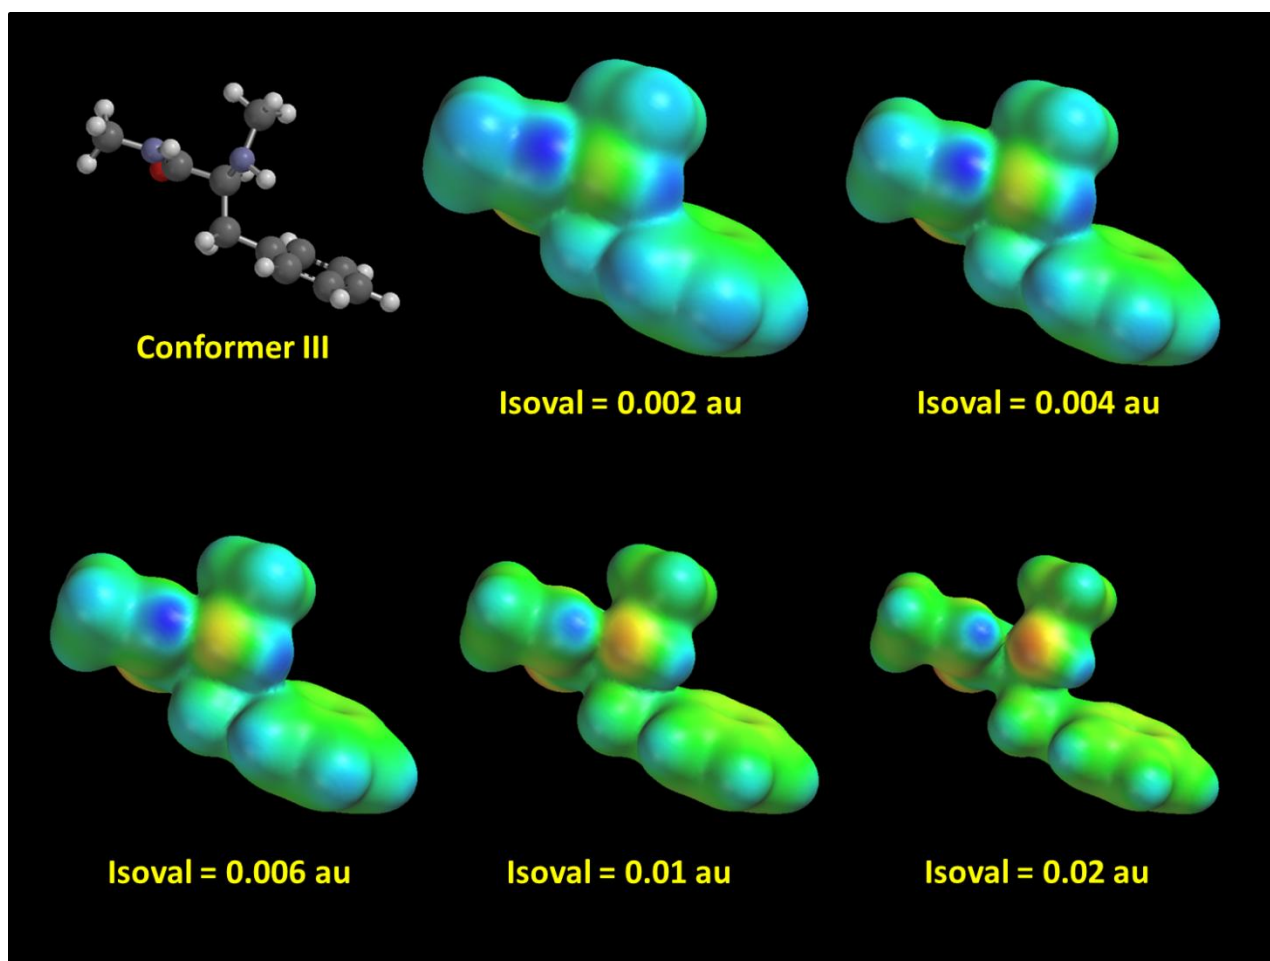

Supplement: c3ra41843j.pdf [file c3ra41843j.pdf]
